# Supplementary material for: A three-component synthesis of aryl(heteroaryl)acylamides
Source: Royal Society of Chemistry journal article supplement (doi:10.1039/c5ob01355k), 2015-01-01

## **A Three-Component Synthesis of Aryl(heteroaryl)acylamides**

Supporting information

(part 2)

Rafał Loska,\* Patrycja Bukowska

*Institute of Organic Chemistry, Polish Academy of Sciences, Kasprzaka 44/52, 01-224 Warsaw 42, Poland*

E-mail: [rafal.loska@icho.edu.pl](mailto:rafal.loska@icho.edu.pl)

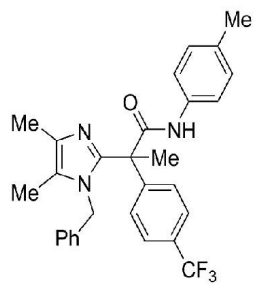

10a:  $^1\text{H}$  NMR (500 MHz,  $\text{CDCl}_3$ )

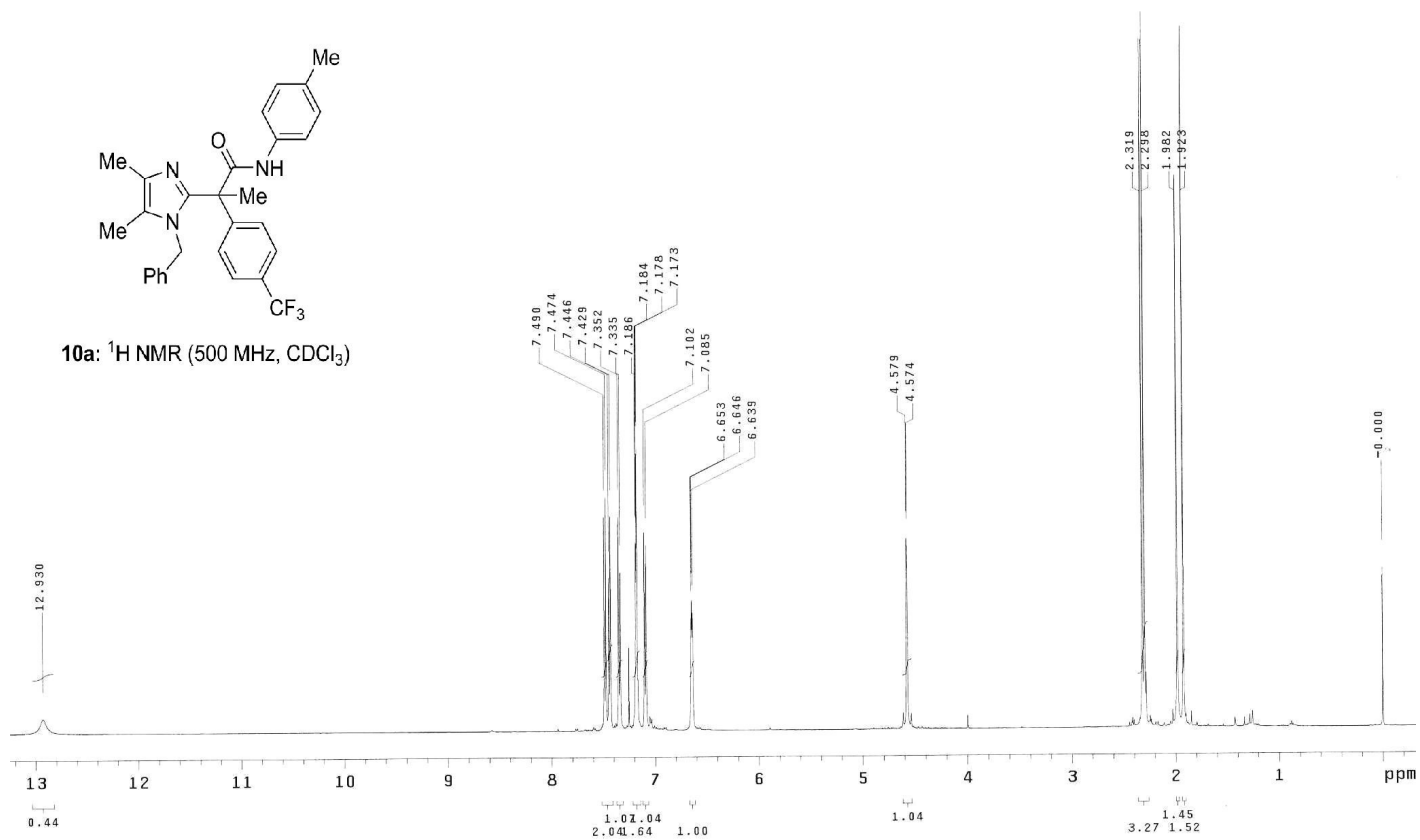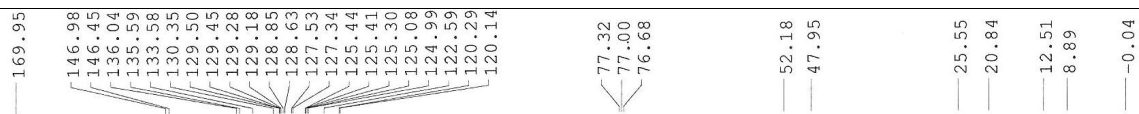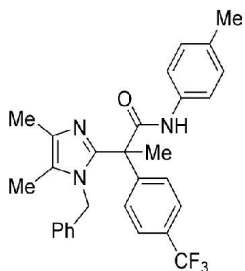

10a:  $^{13}\text{C}$  NMR (100 MHz,  $\text{CDCl}_3$ )

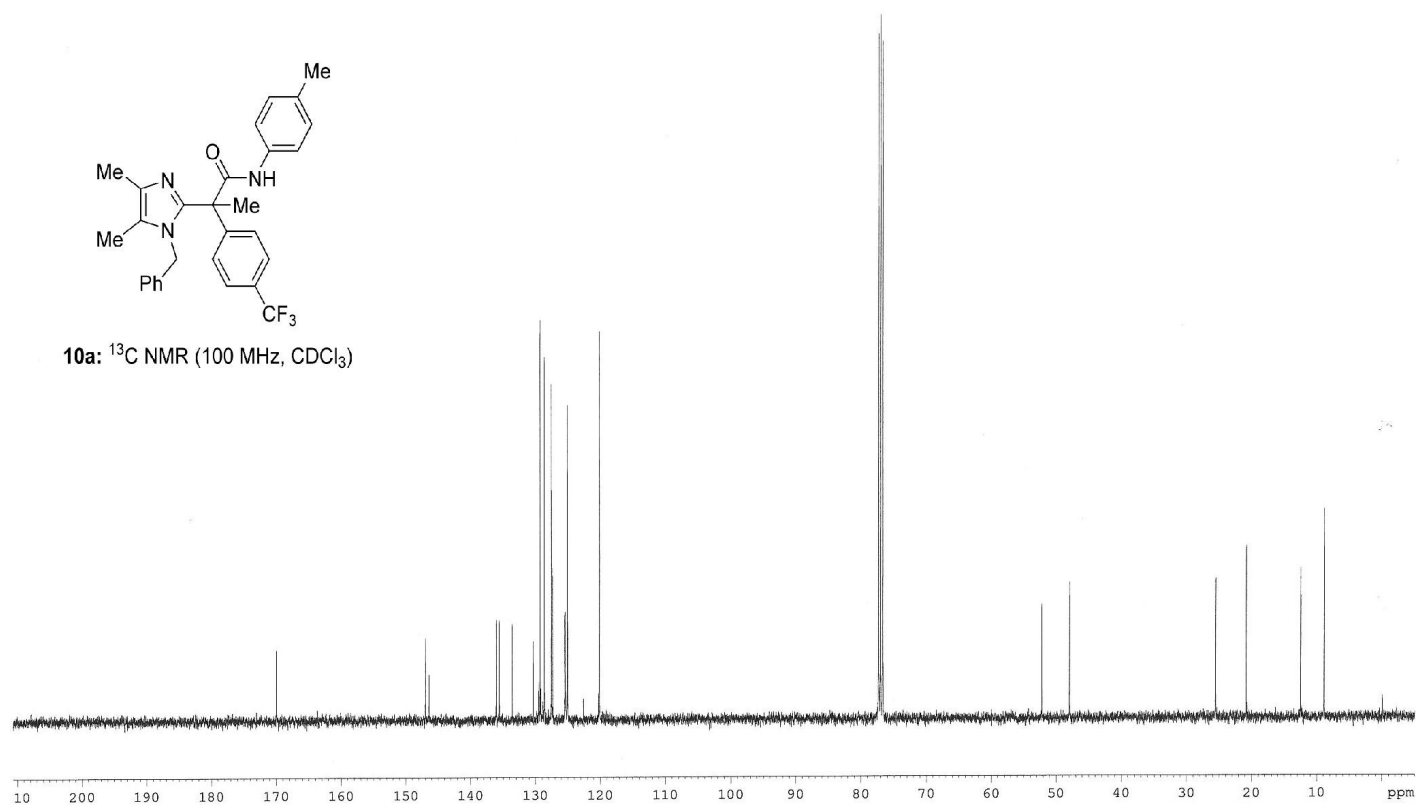

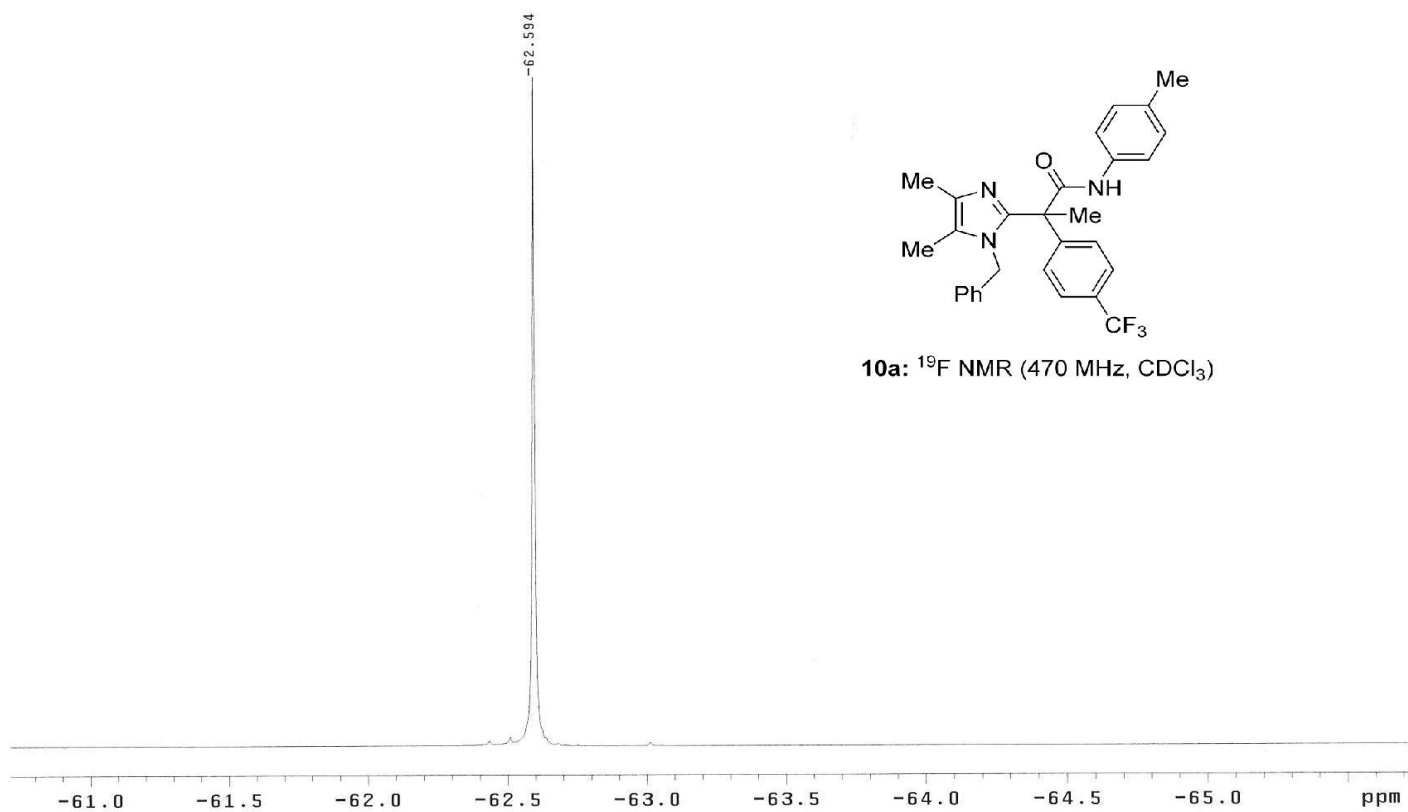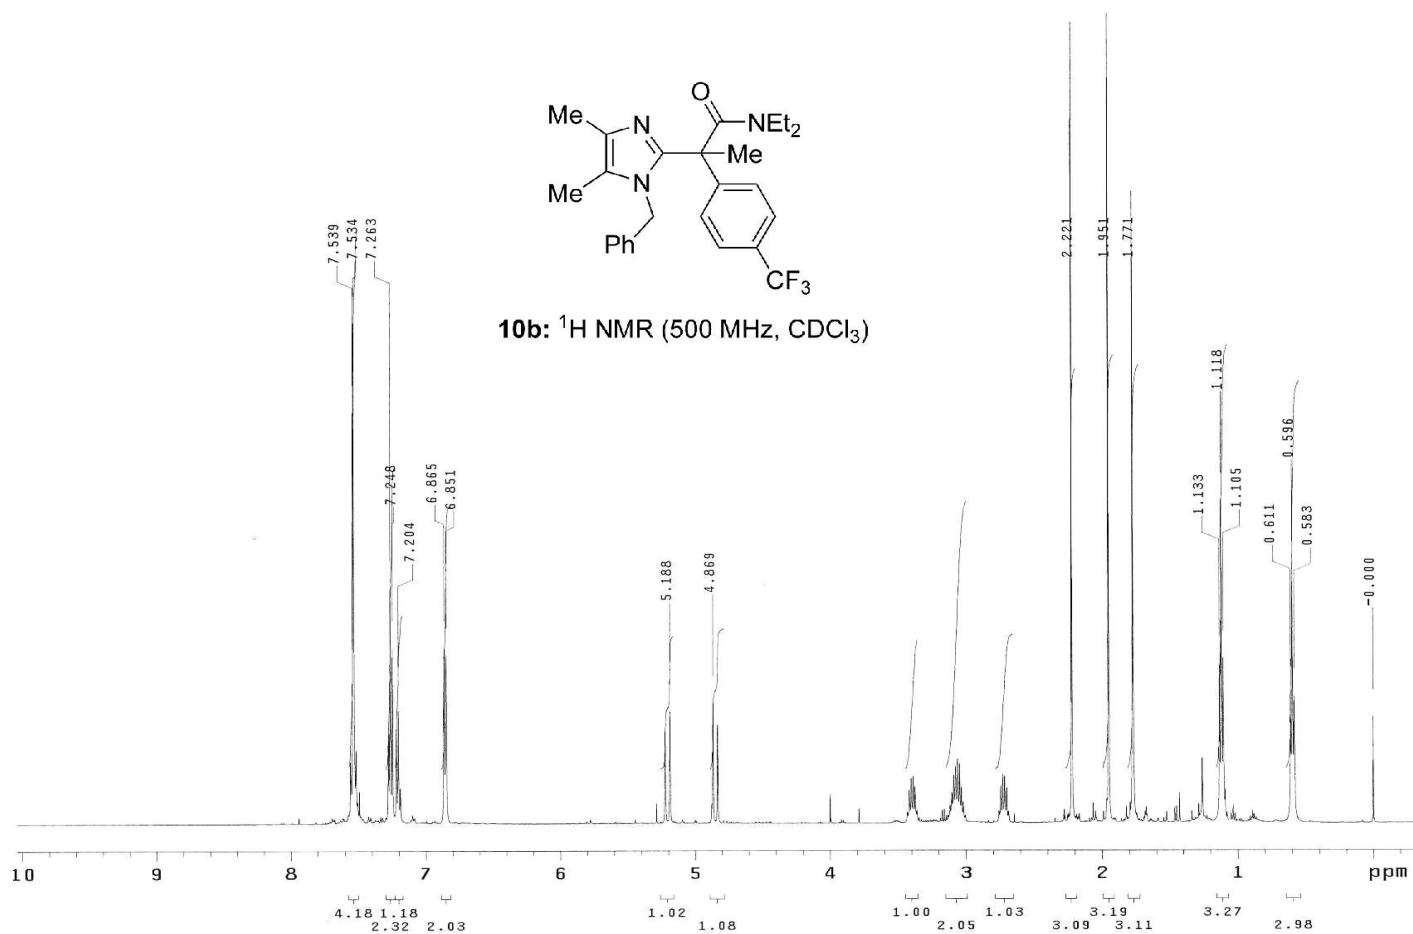

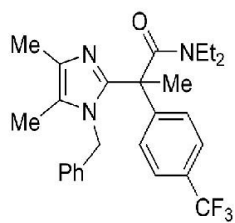

**10b:**  $^{13}\text{C}$  NMR (125 MHz,  $\text{CDCl}_3$ )

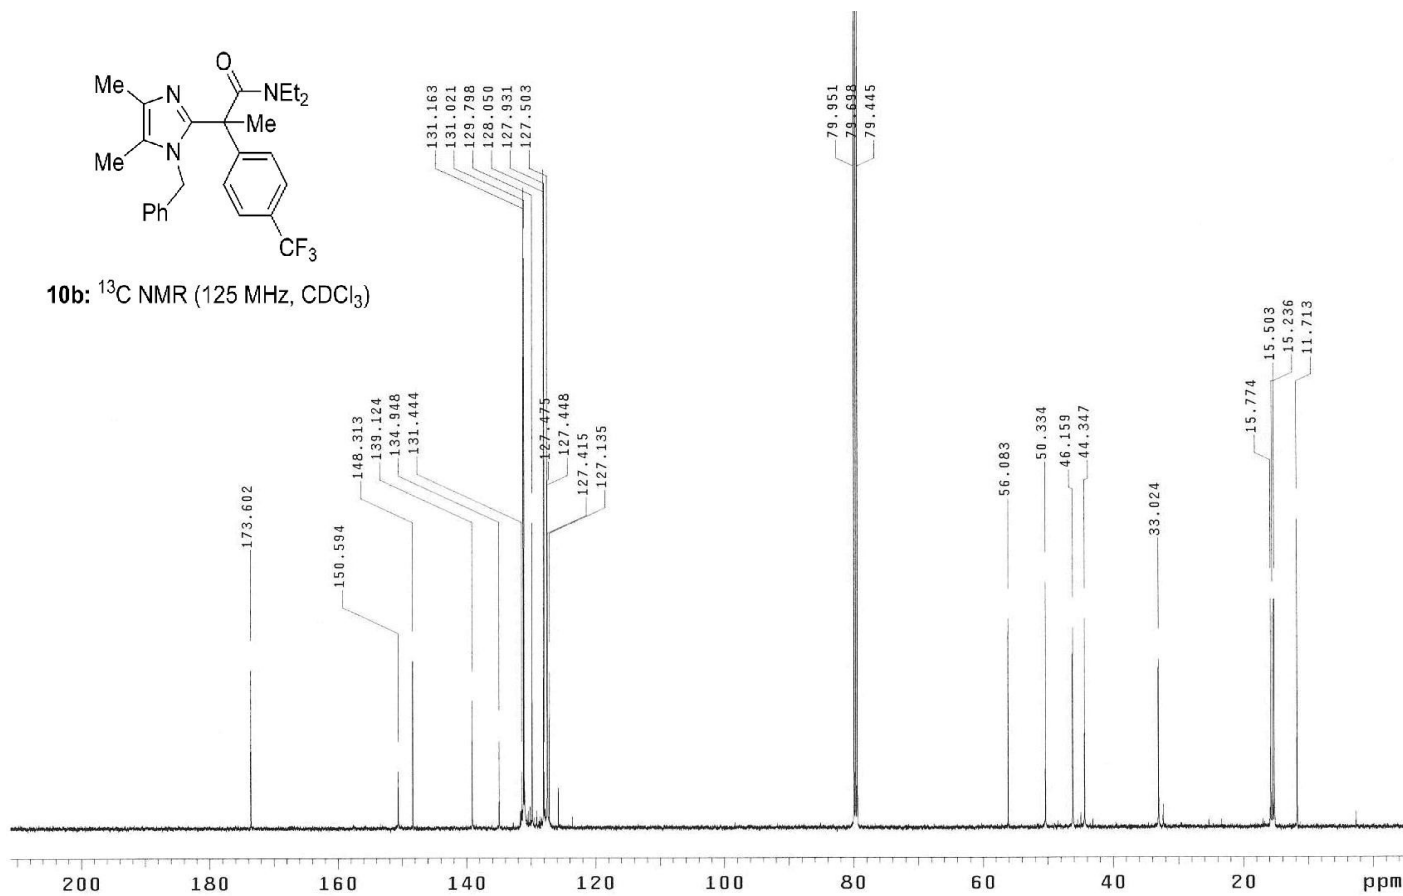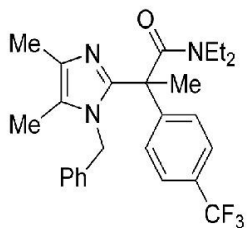

**10b:**  $^{19}\text{F}$  NMR (470 MHz,  $\text{CDCl}_3$ )

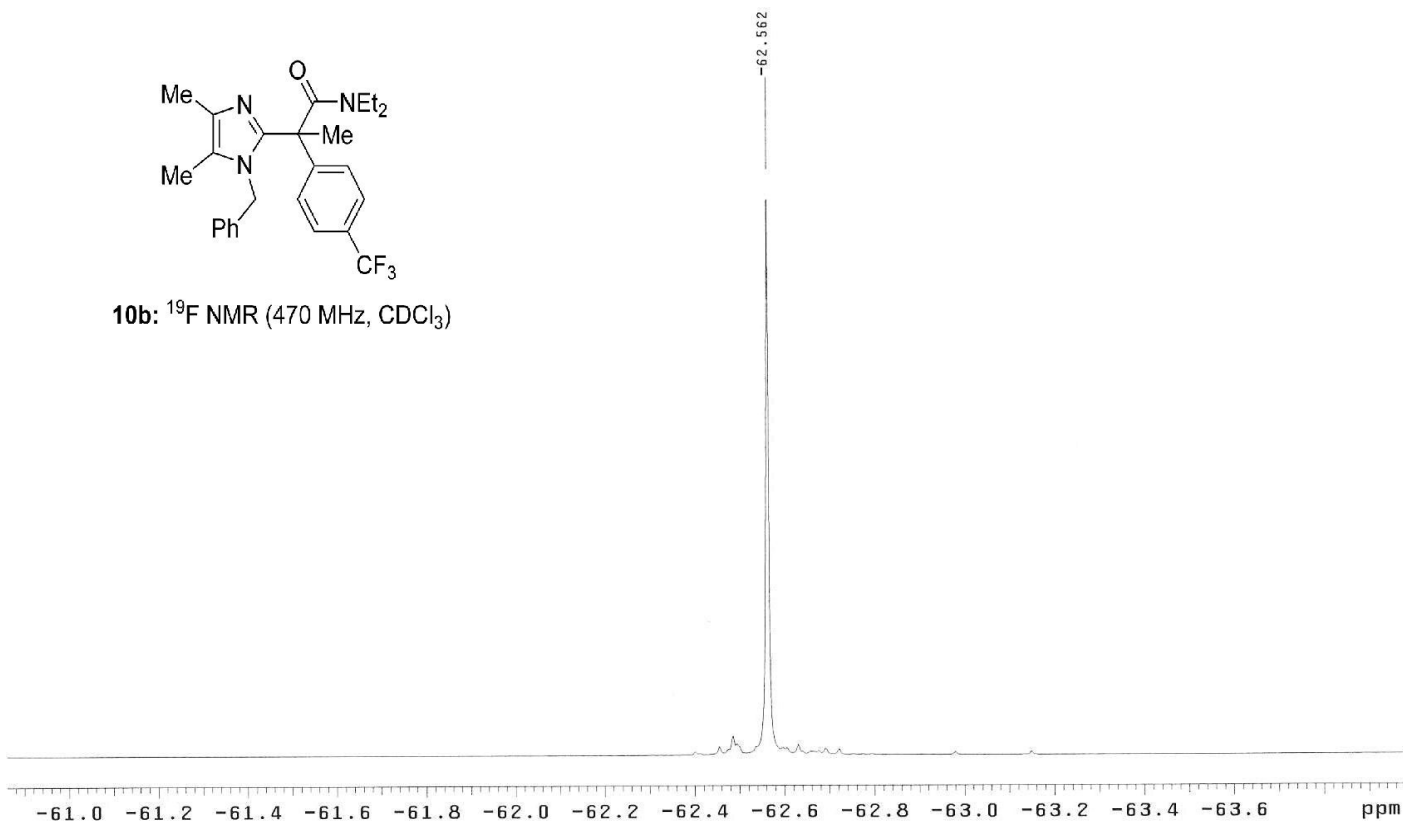

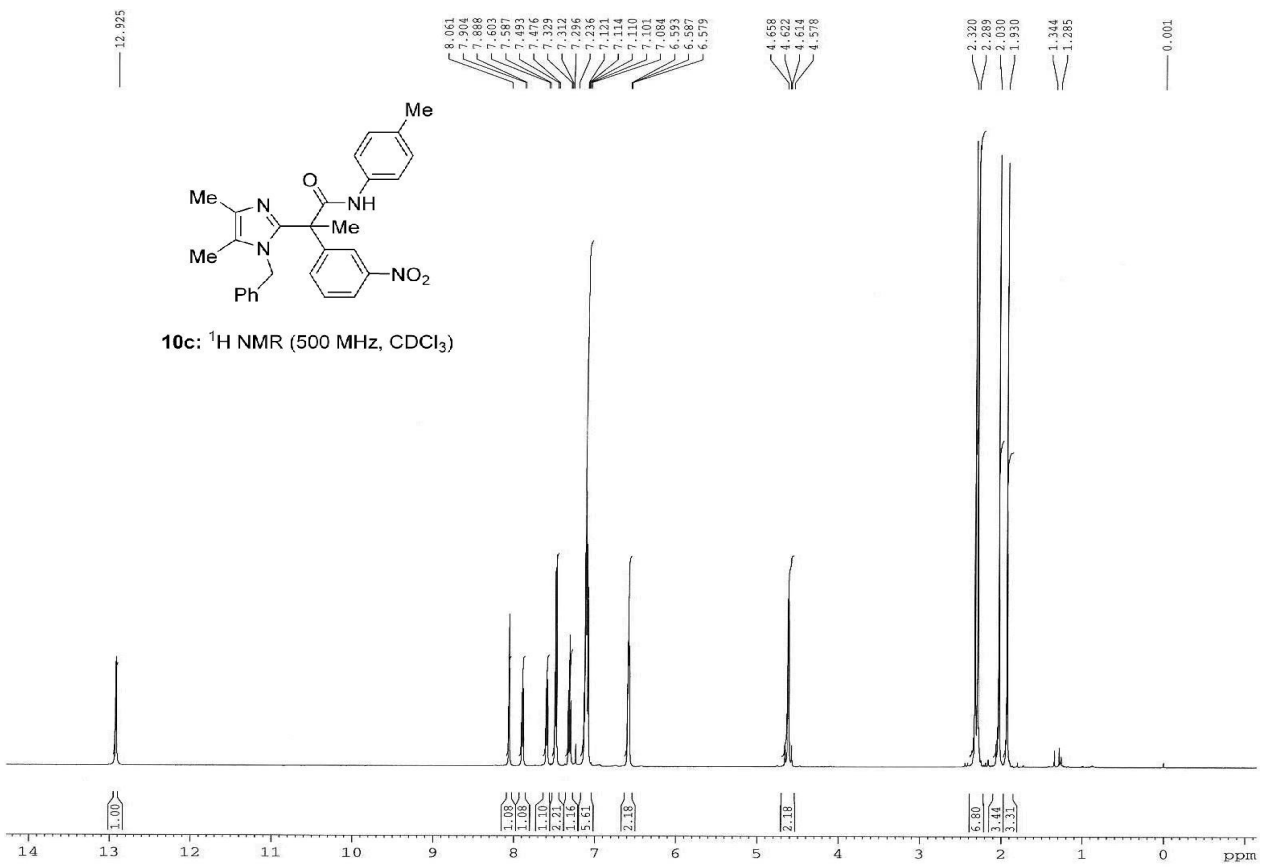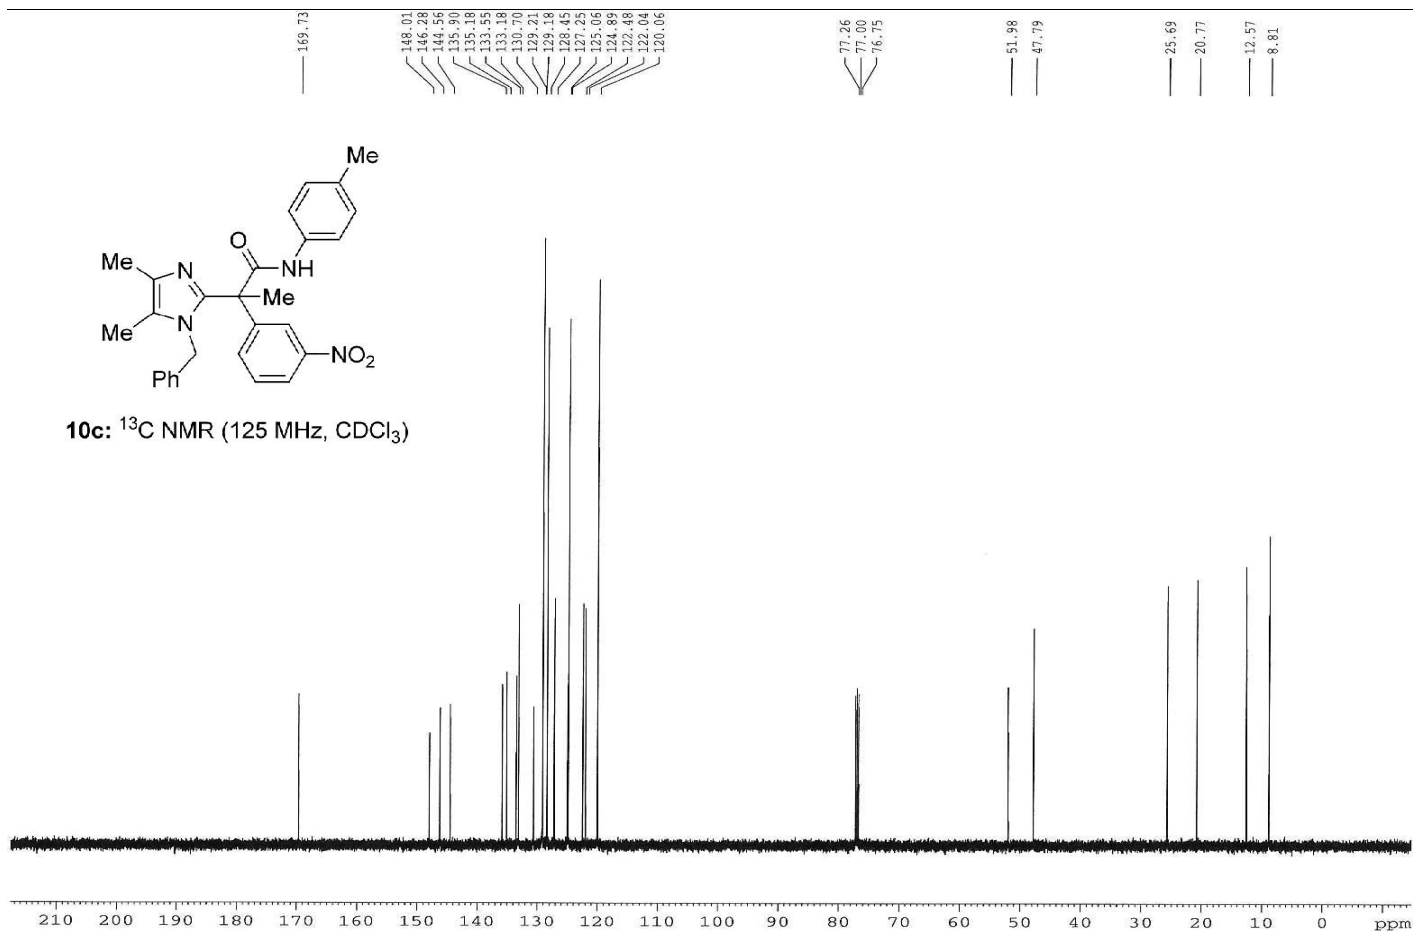

13.03

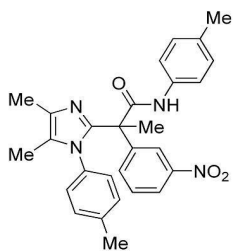

10d: <sup>1</sup>H NMR (400 MHz, CDCl<sub>3</sub>)

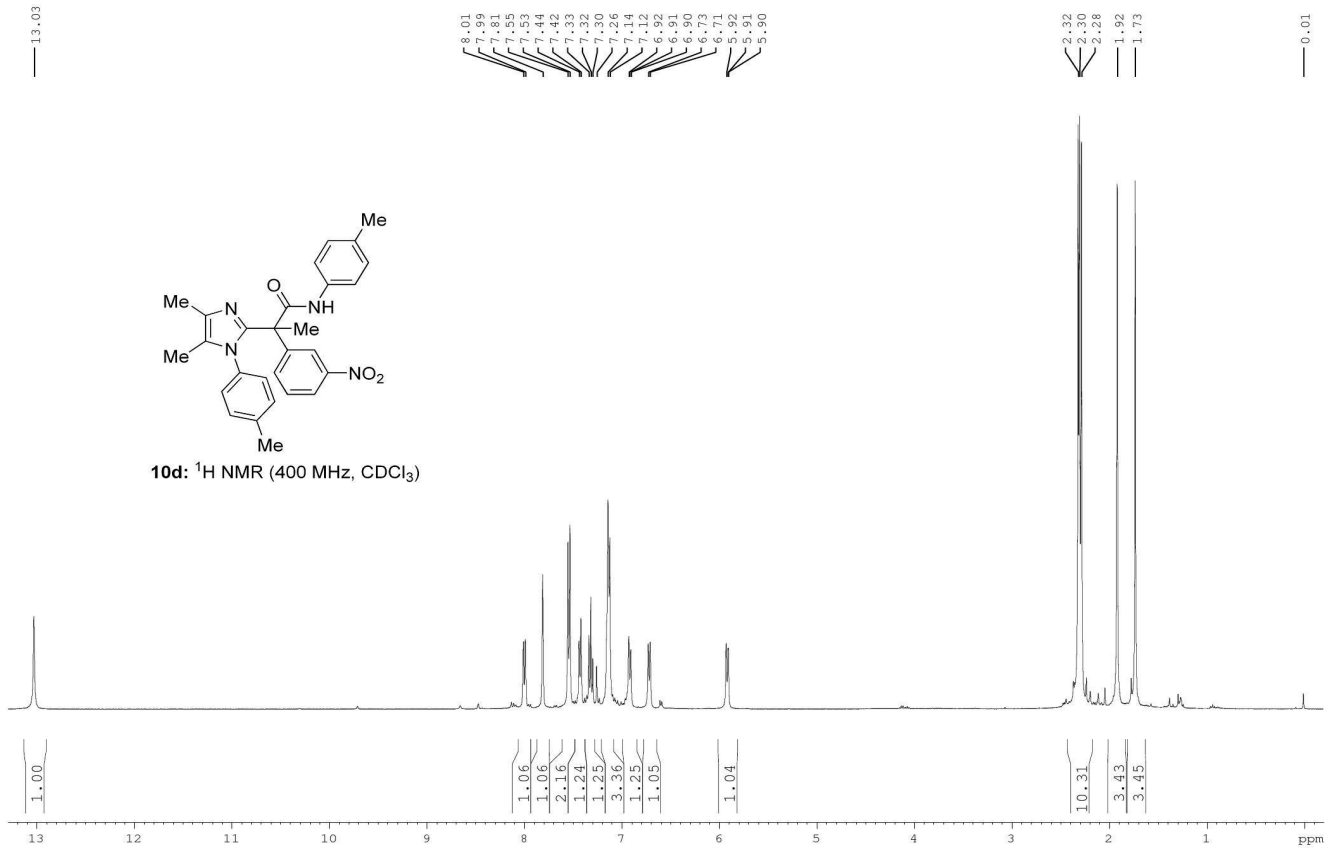

170.4

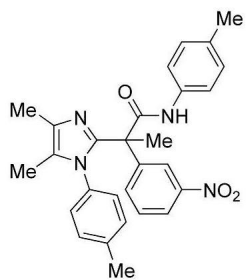

10d: <sup>13</sup>C NMR (100 MHz, CDCl<sub>3</sub>)

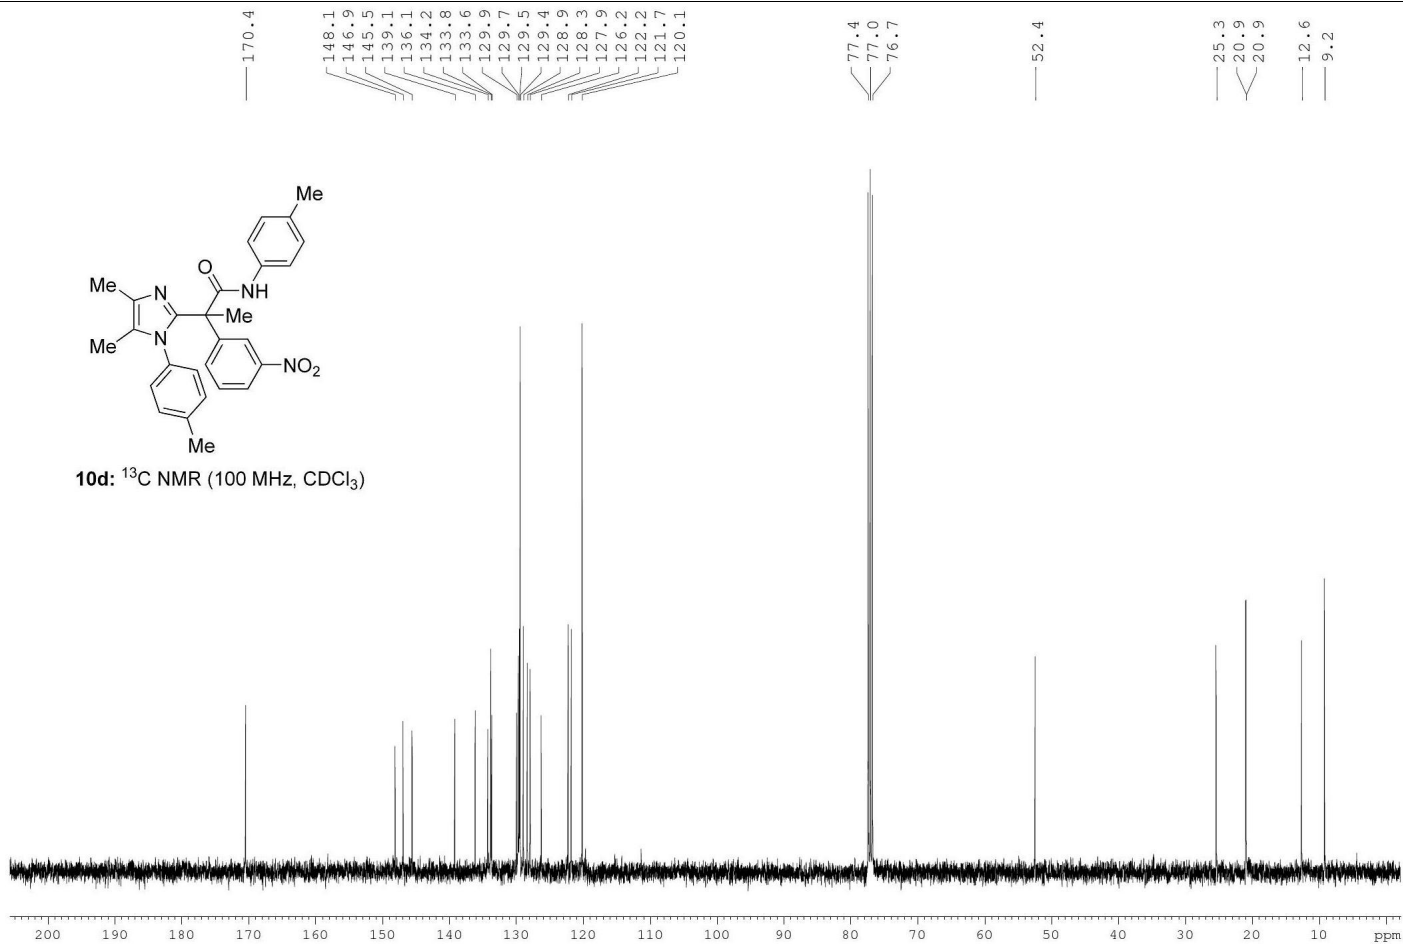

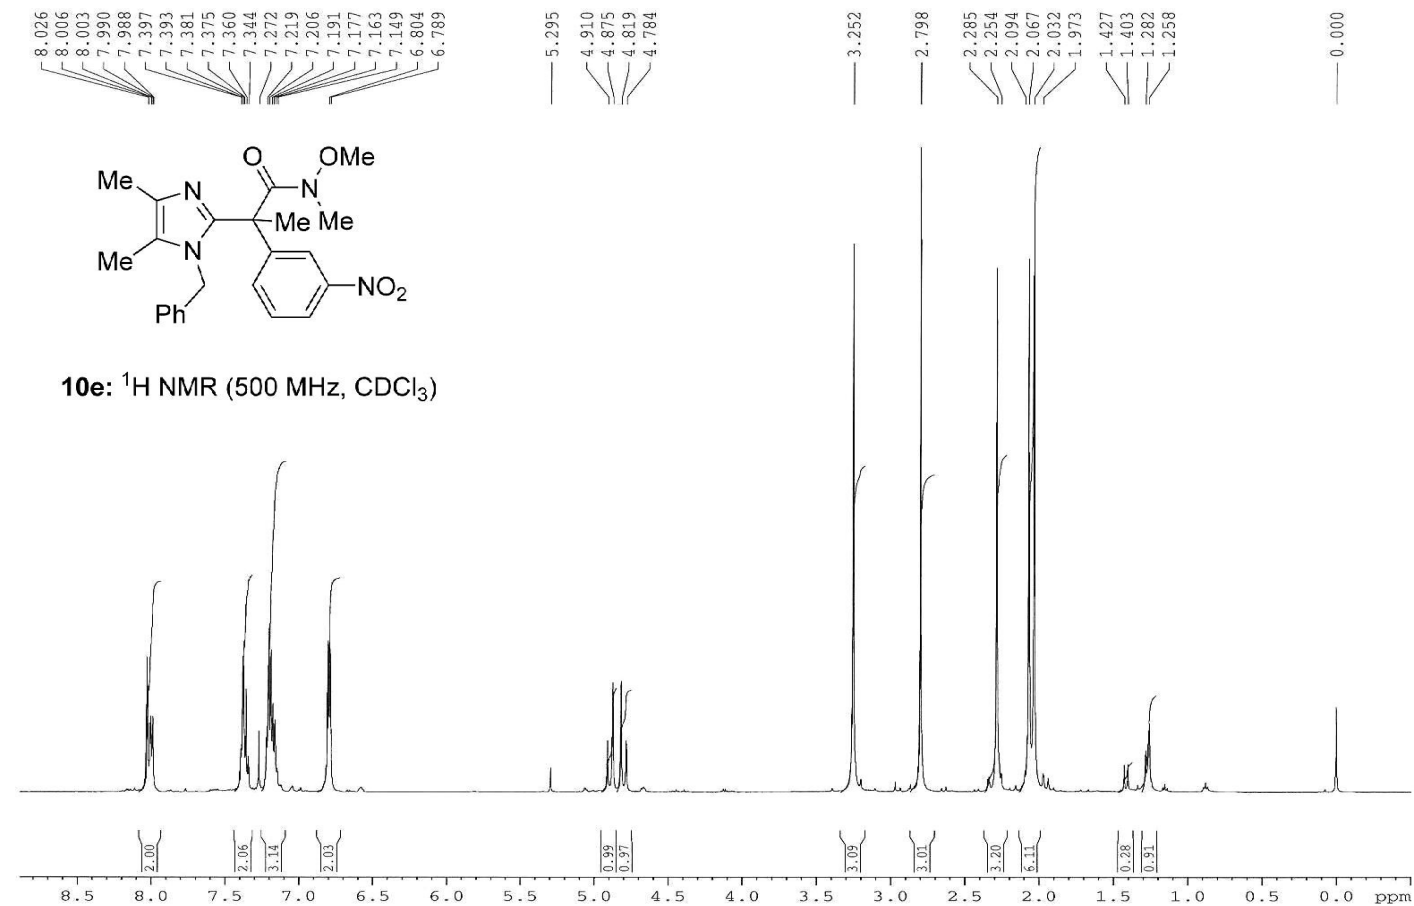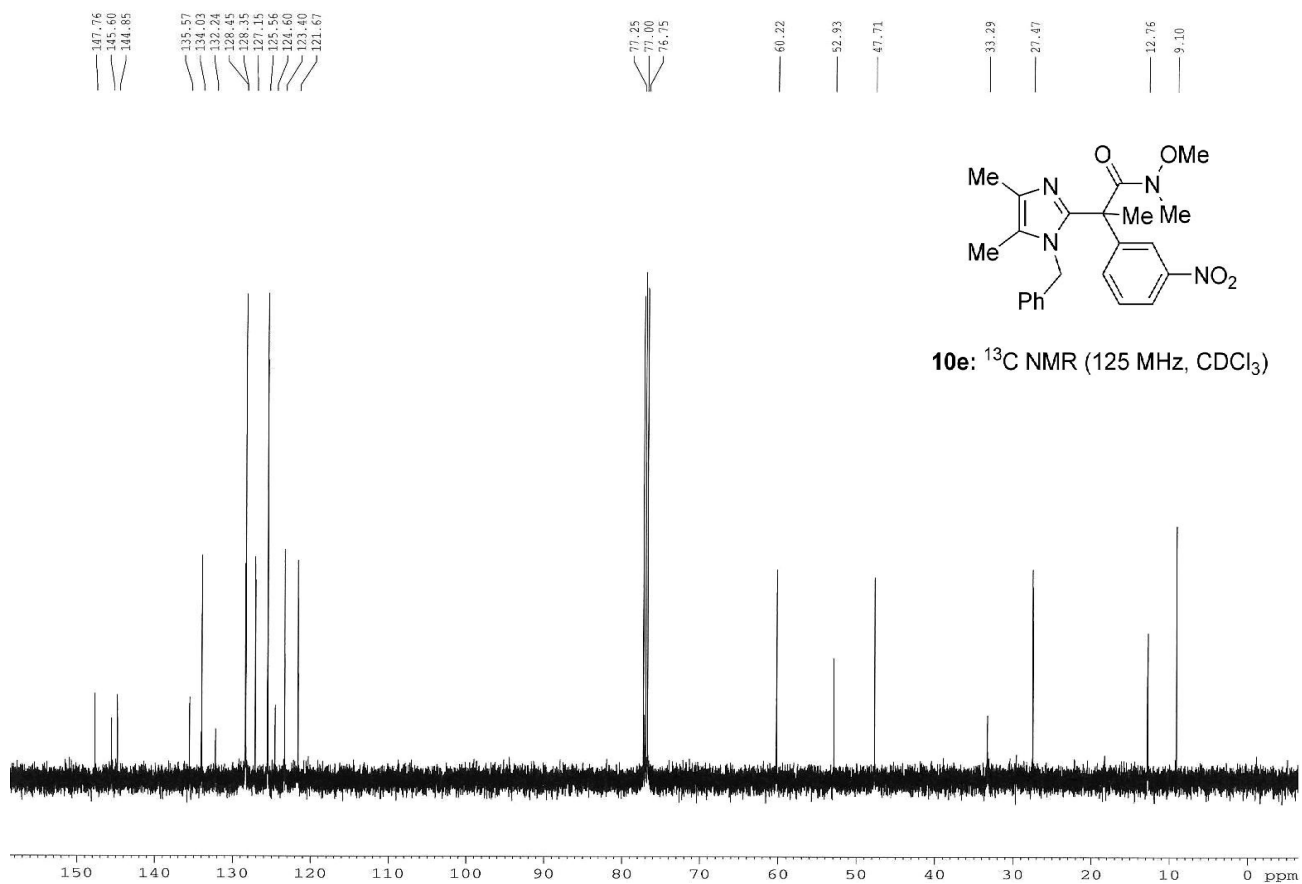

13.205

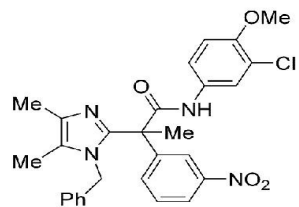

**10f**:  $^1\text{H}$  NMR (500 MHz,  $\text{CDCl}_3$ )

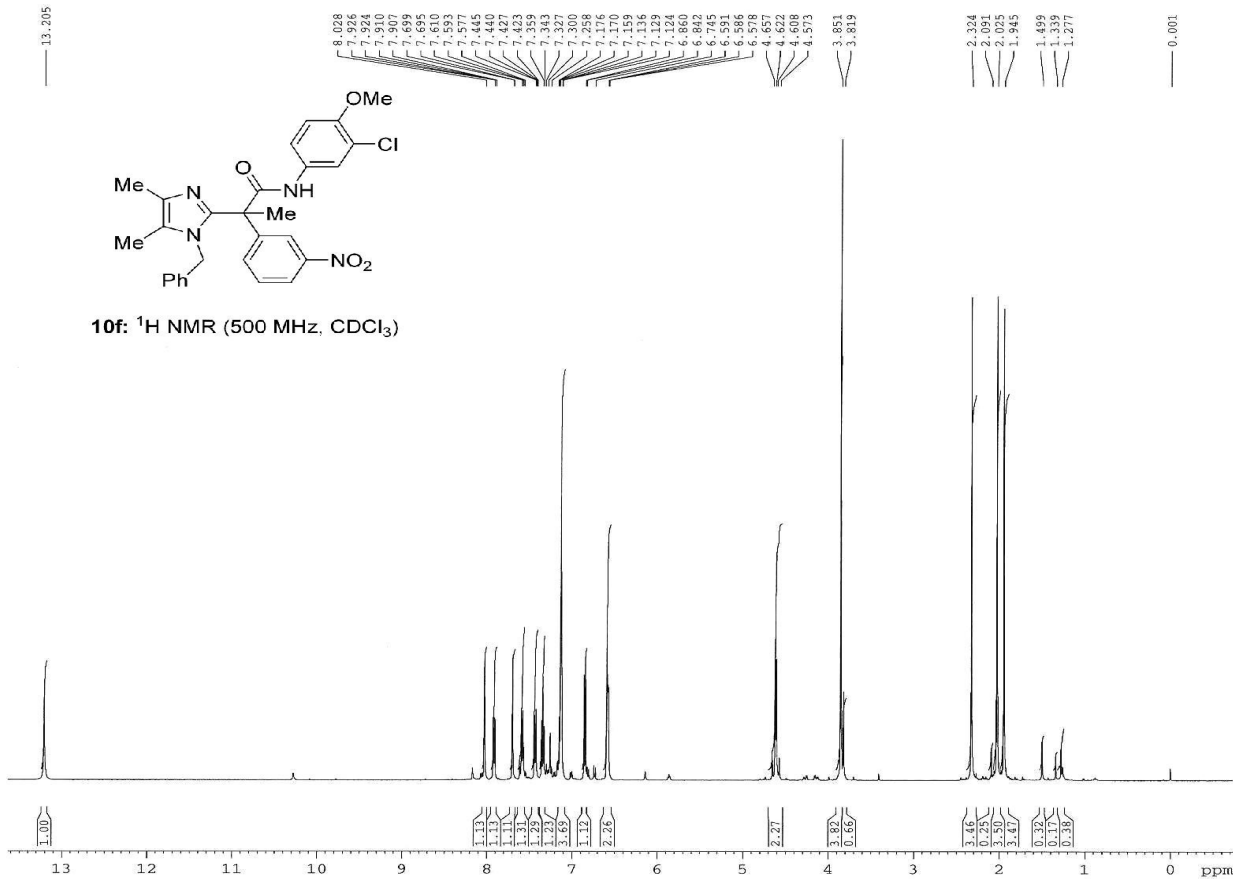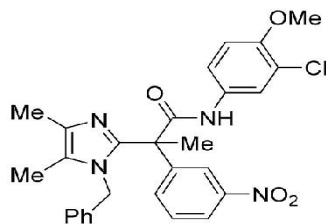

**10f**:  $^{13}\text{C}$  NMR (125 MHz,  $\text{CDCl}_3$ )

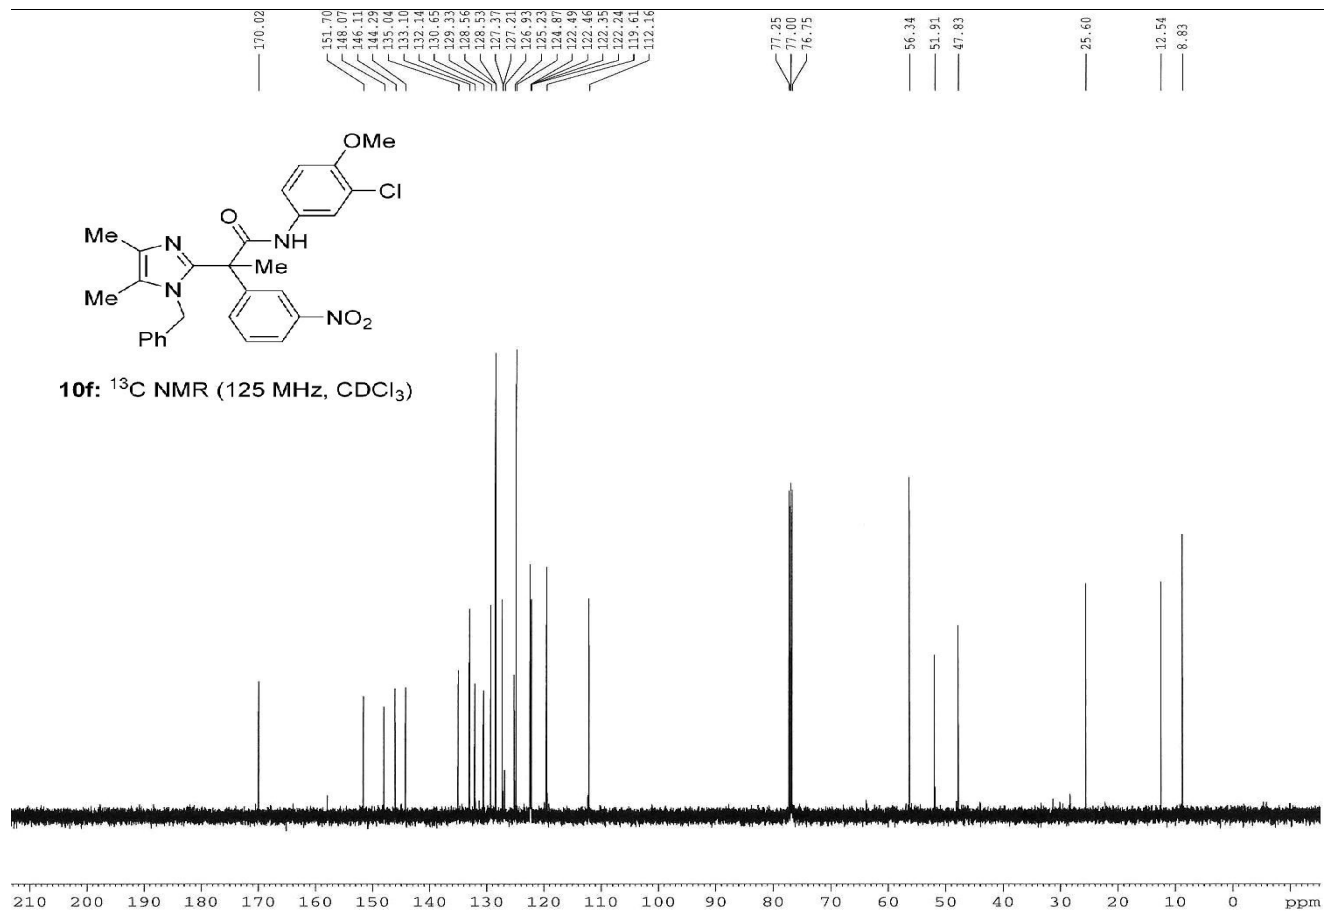



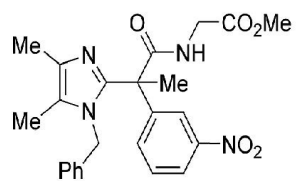

**10g:**  $^1\text{H}$  NMR (200 MHz,  $\text{CDCl}_3$ )

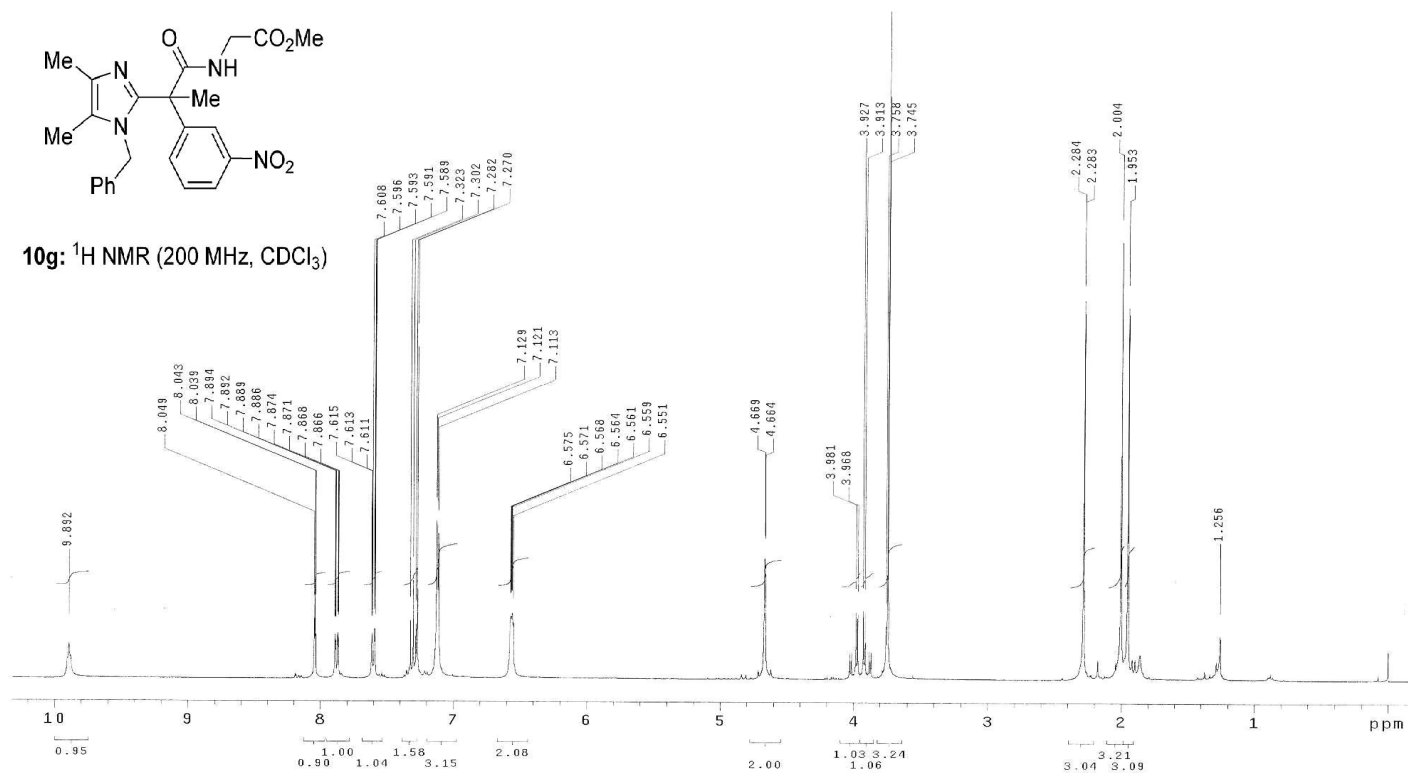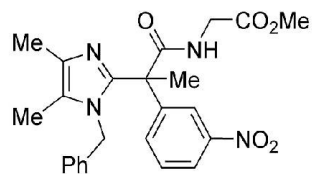

**10g:**  $^{13}\text{C}$  NMR (50 MHz,  $\text{CDCl}_3$ )

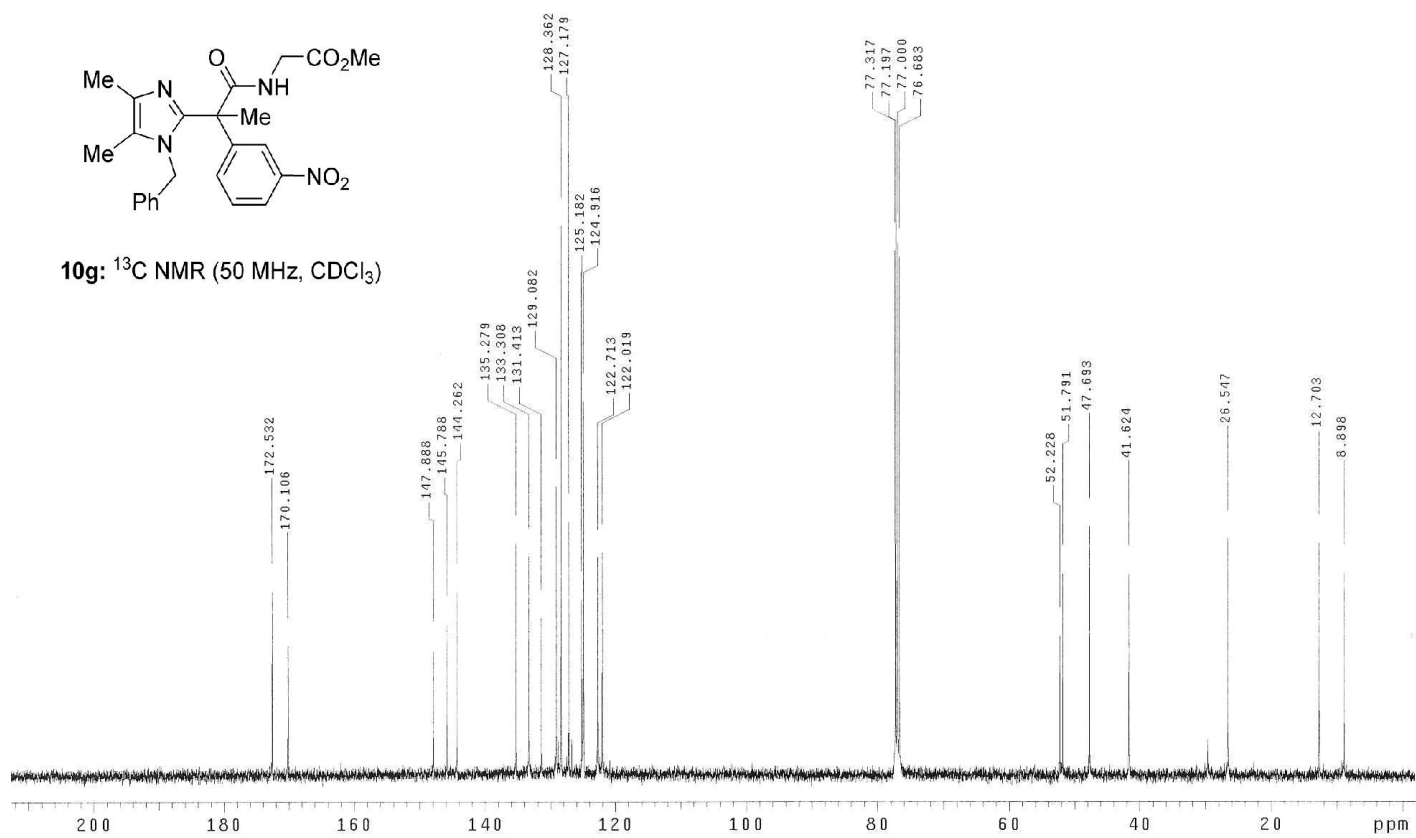

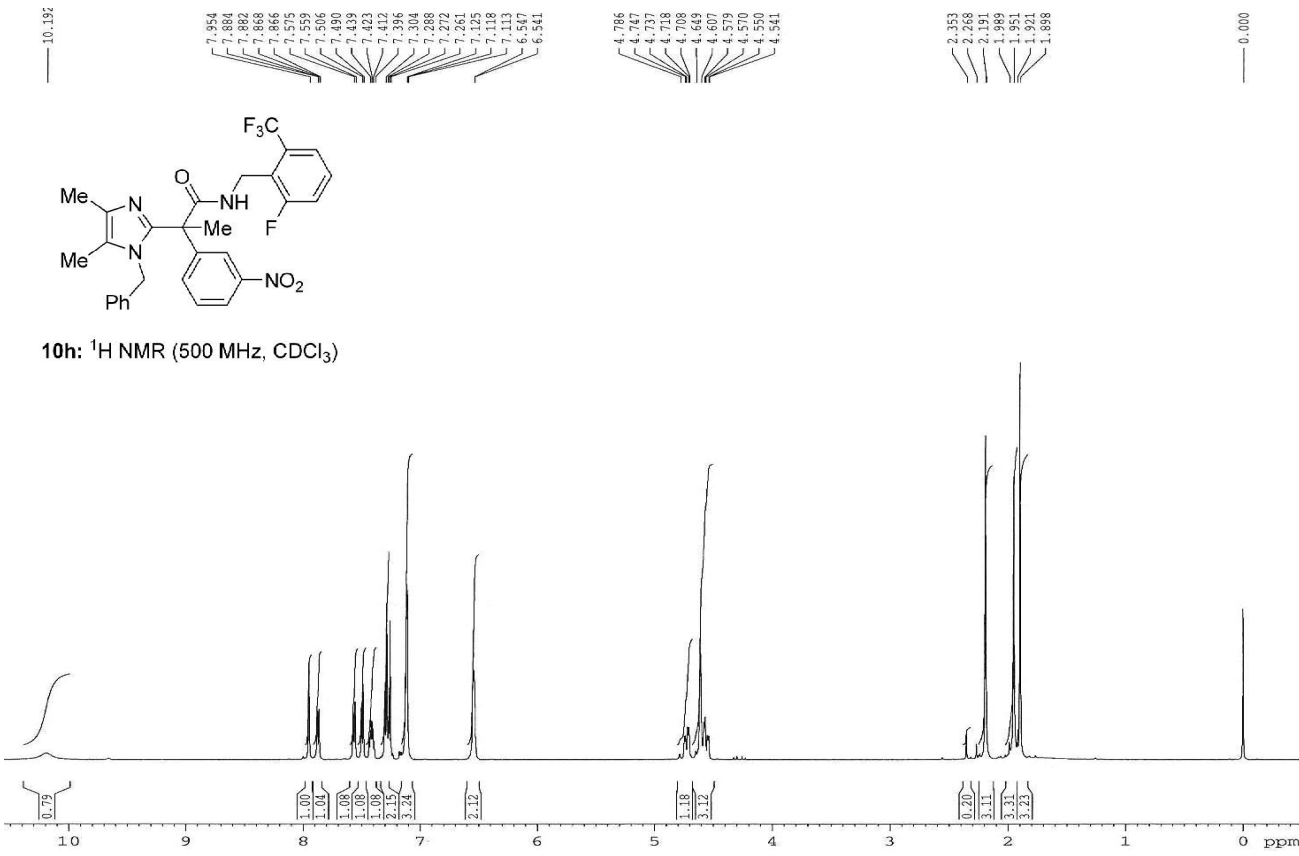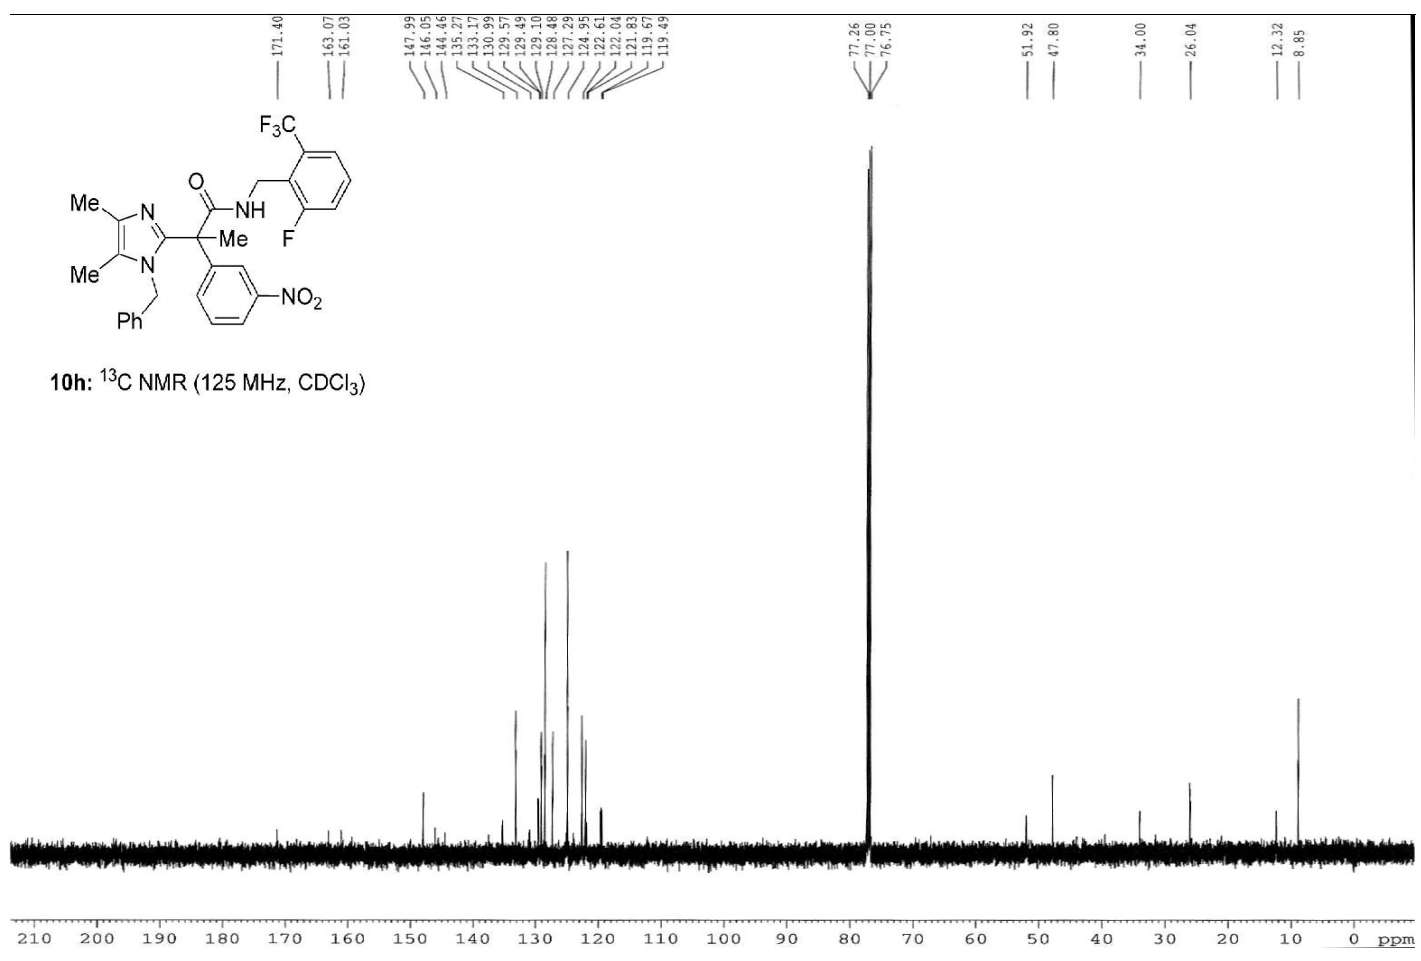

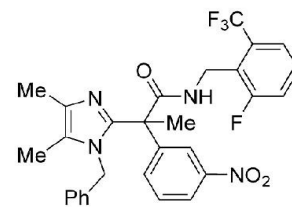

10h:  $^{19}\text{F}$  NMR (470 MHz,  $\text{CDCl}_3$ )

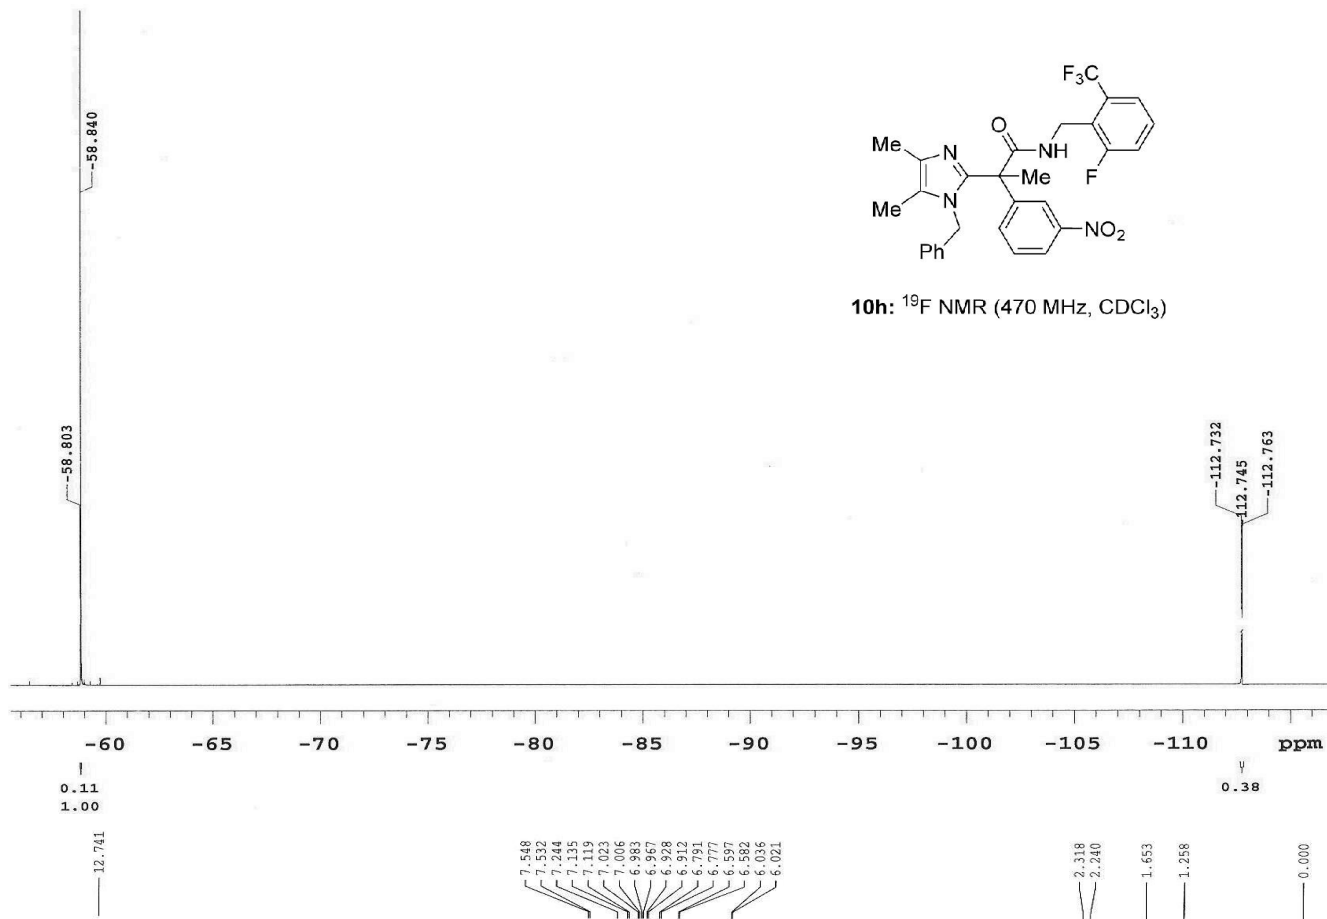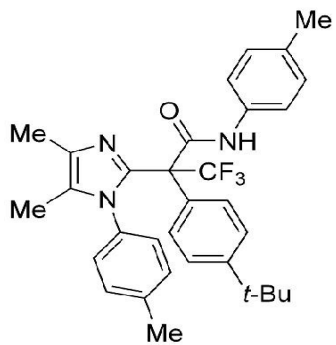

10i:  $^1\text{H}$  NMR (500 MHz,  $\text{CDCl}_3$ )

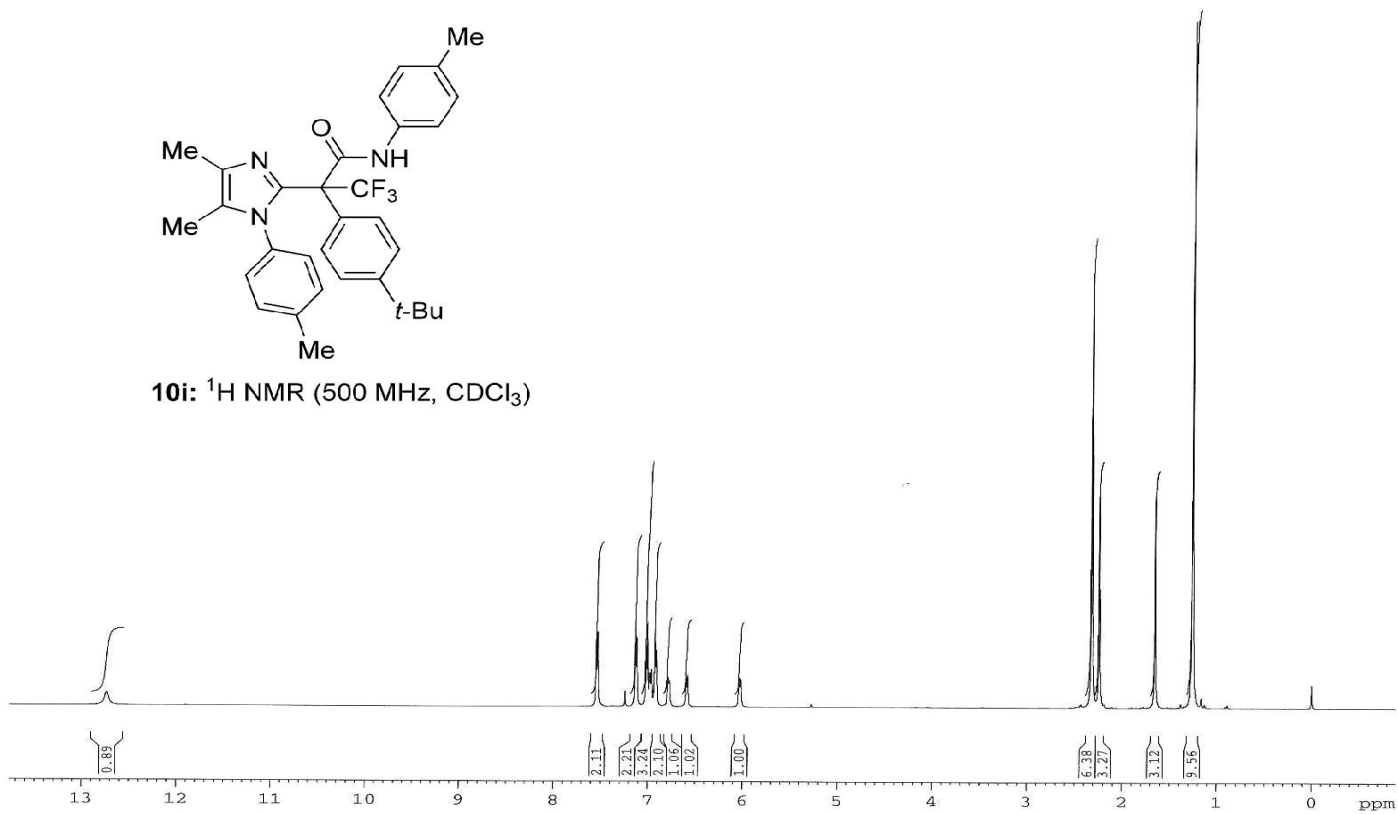

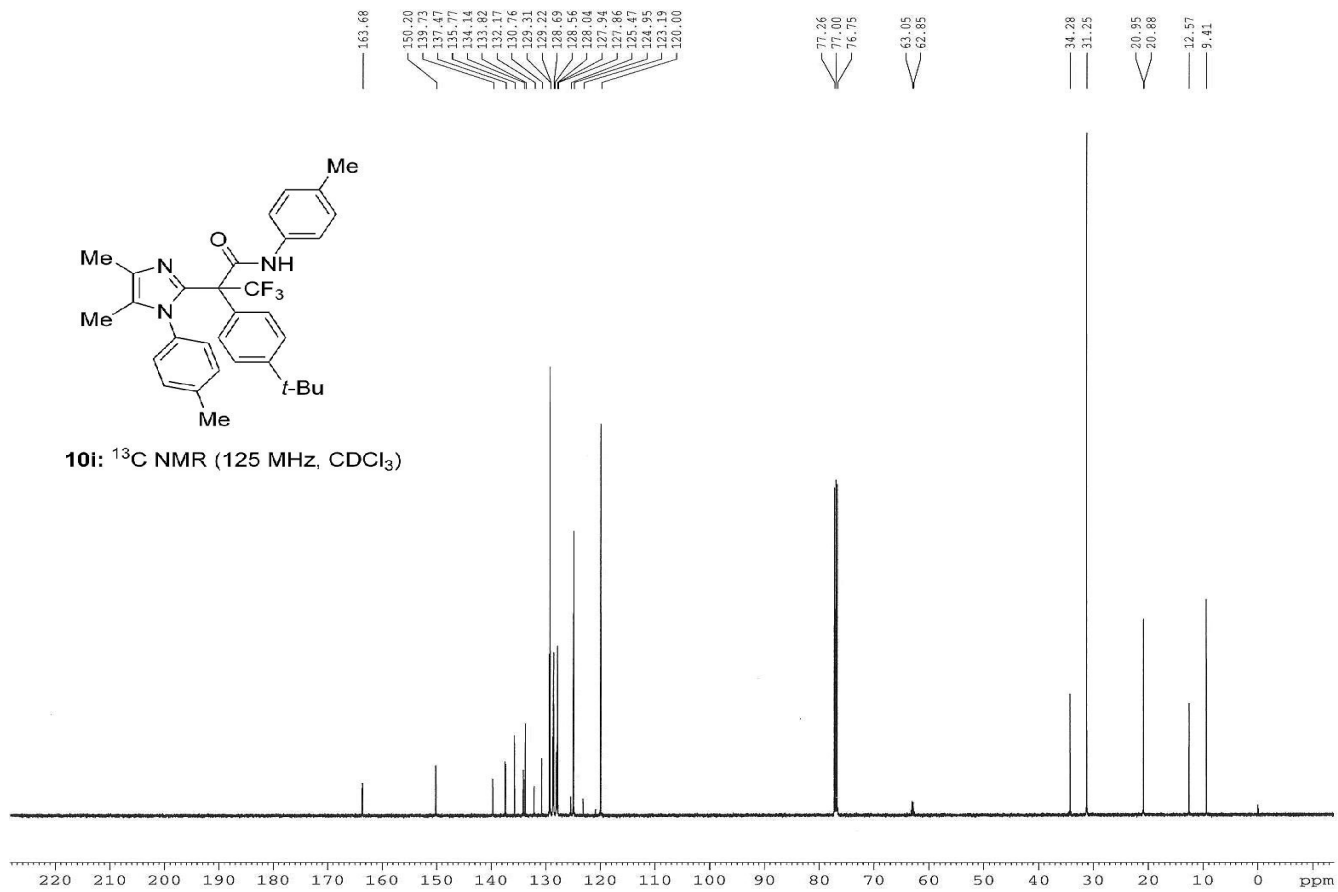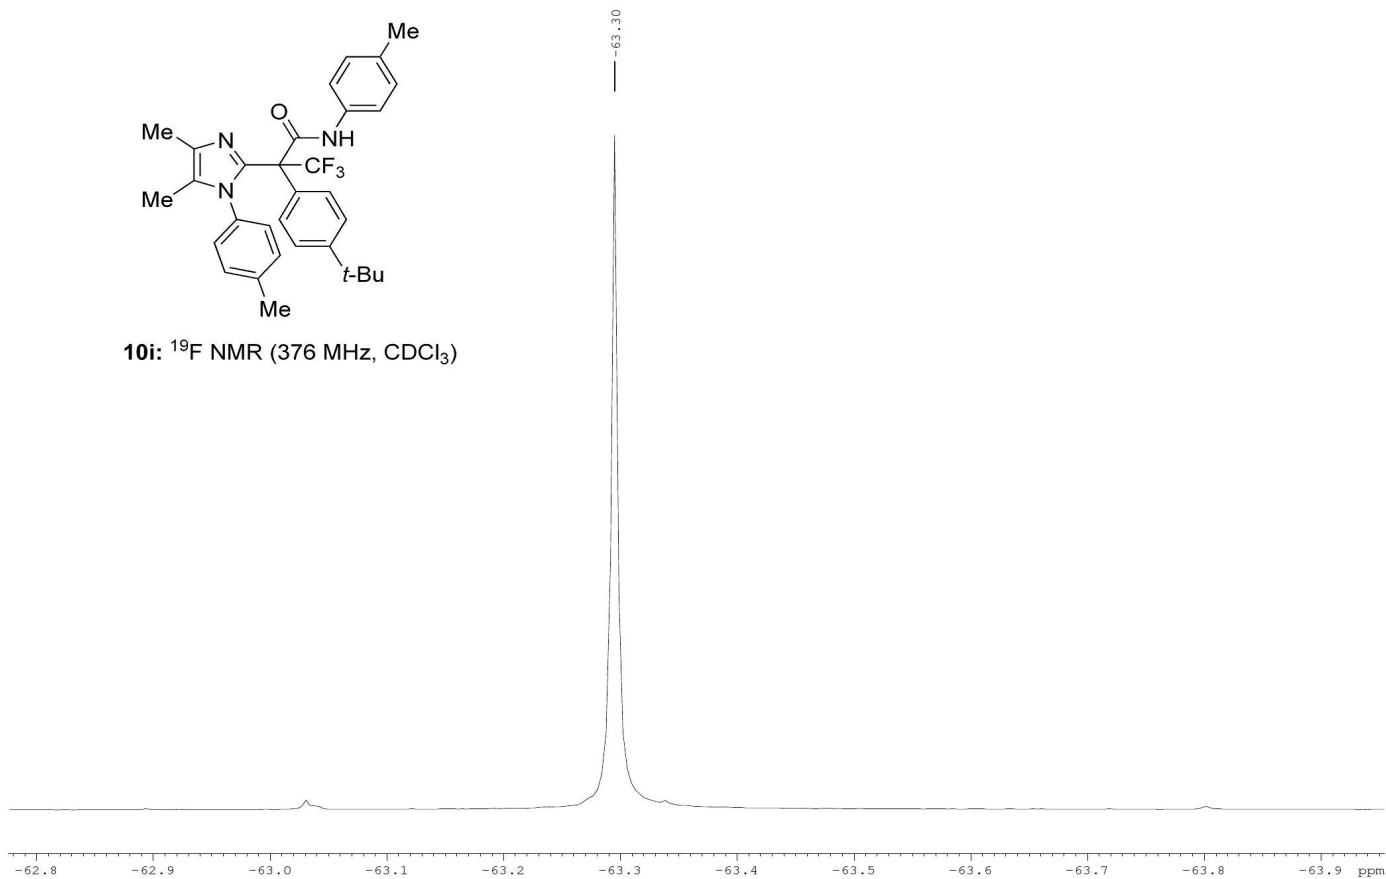

9.83  
9.82  
9.80

7.02  
7.00  
6.94  
6.92  
6.90  
6.69  
6.67  
6.17  
6.15  
6.15

4.54  
4.53  
4.52

3.68  
3.66  
3.66  
3.64  
3.52  
3.51  
3.51  
3.49  
3.36  
3.34  
3.33

2.25  
1.71  
1.71  
1.69  
1.64  
1.25  
1.22  
1.21  
1.20  
1.19

0.00

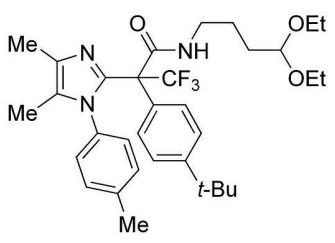

10j: <sup>1</sup>H NMR (400 MHz, CDCl<sub>3</sub>)

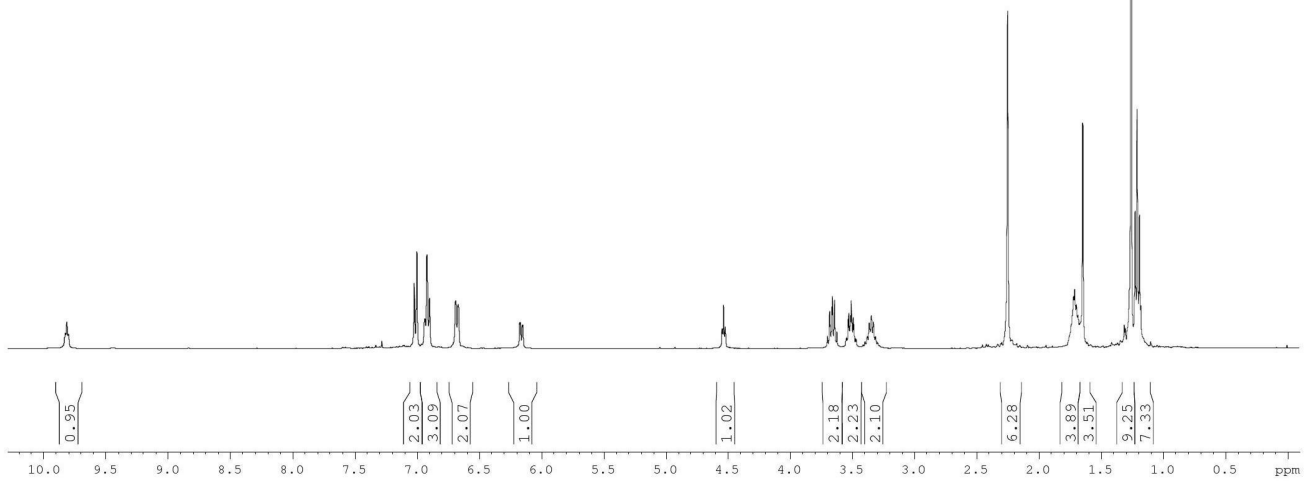

165.9  
149.9  
139.8  
137.2  
134.2  
132.0  
131.0  
129.0  
128.6  
128.3  
127.9  
127.8  
127.3  
125.7  
124.7  
122.9  
102.5  
77.3  
77.0  
76.7  
62.5  
62.2  
61.1  
61.0  
39.8  
34.1  
31.1  
30.9  
24.2  
20.8  
15.2  
12.5  
9.3

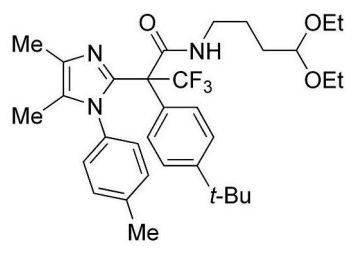

10j: <sup>13</sup>C NMR (100 MHz, CDCl<sub>3</sub>)

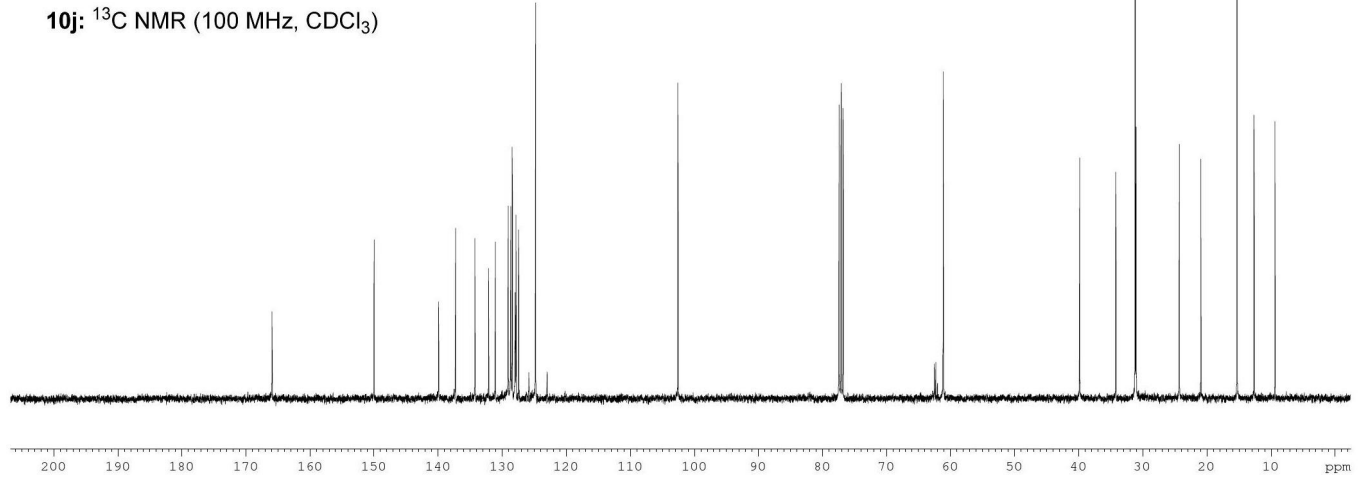

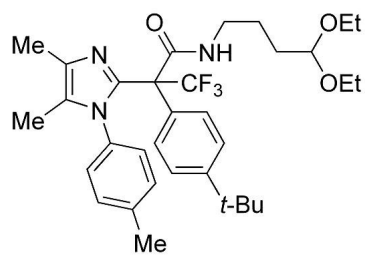

10j: <sup>19</sup>F NMR (376 MHz, CDCl<sub>3</sub>)

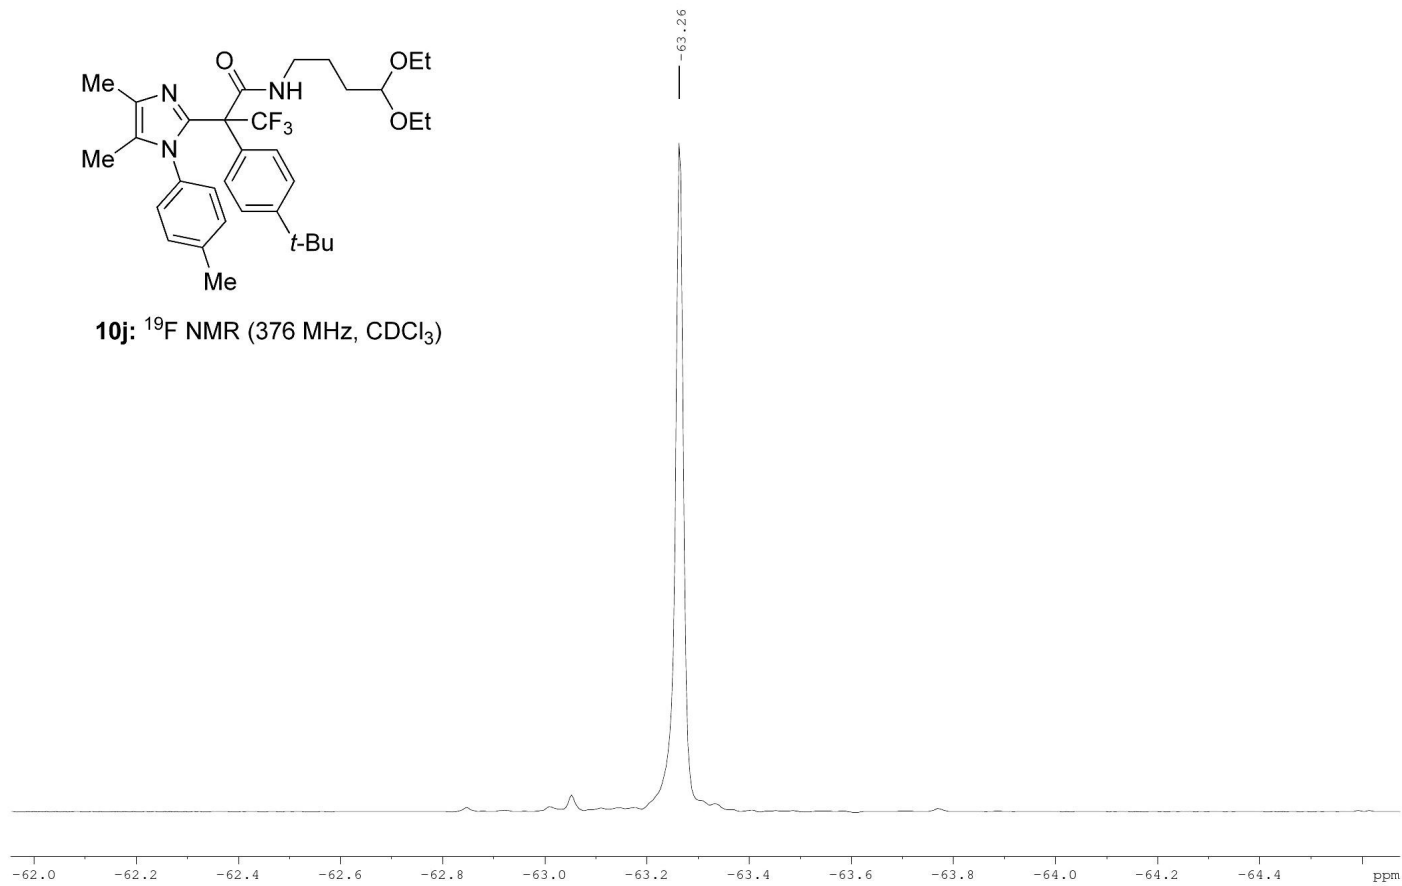

11.46  
8.202  
8.186  
7.976  
7.960  
7.781  
7.779  
7.765  
7.750  
7.748  
7.590  
7.576  
7.565  
7.548  
7.464  
7.447  
7.305  
7.288  
7.243  
7.233  
7.113  
7.097  
5.205  
2.649  
2.288  
1.397  
1.245  
0.000

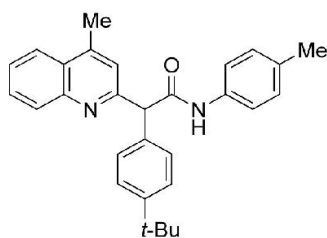

**11a:**  $^1\text{H}$  NMR (500 MHz,  $\text{CDCl}_3$ )

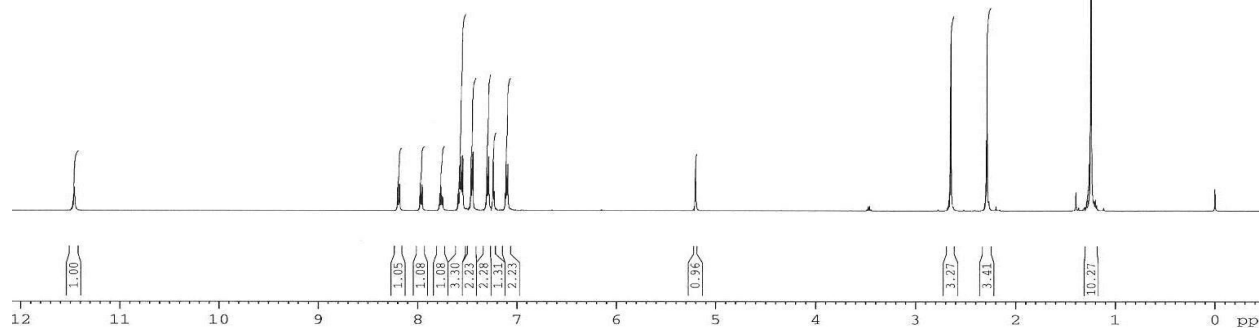

168.38  
158.66  
150.26  
146.44  
146.01  
136.04  
135.80  
133.33  
129.89  
129.33  
128.92  
127.77  
127.08  
124.61  
125.71  
123.86  
123.35  
119.77  
77.26  
77.00  
76.75  
60.06  
34.37  
31.23  
20.83  
18.75  
0 ppm

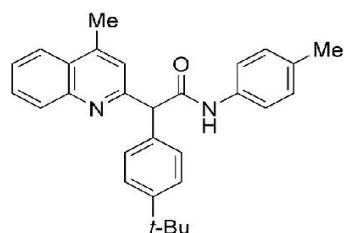

**11a:**  $^{13}\text{C}$  NMR (125 MHz,  $\text{CDCl}_3$ )

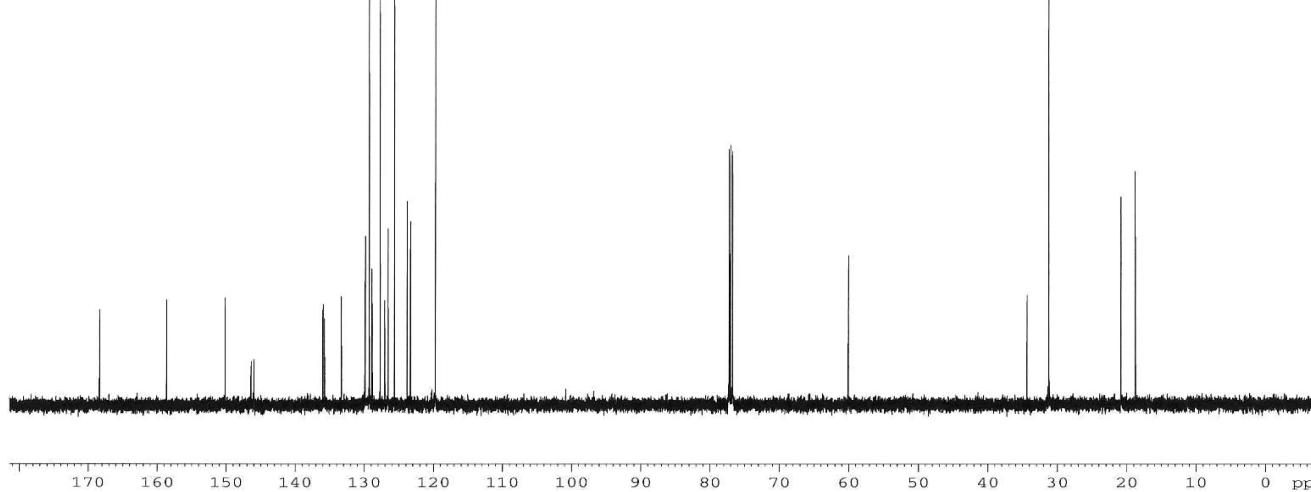

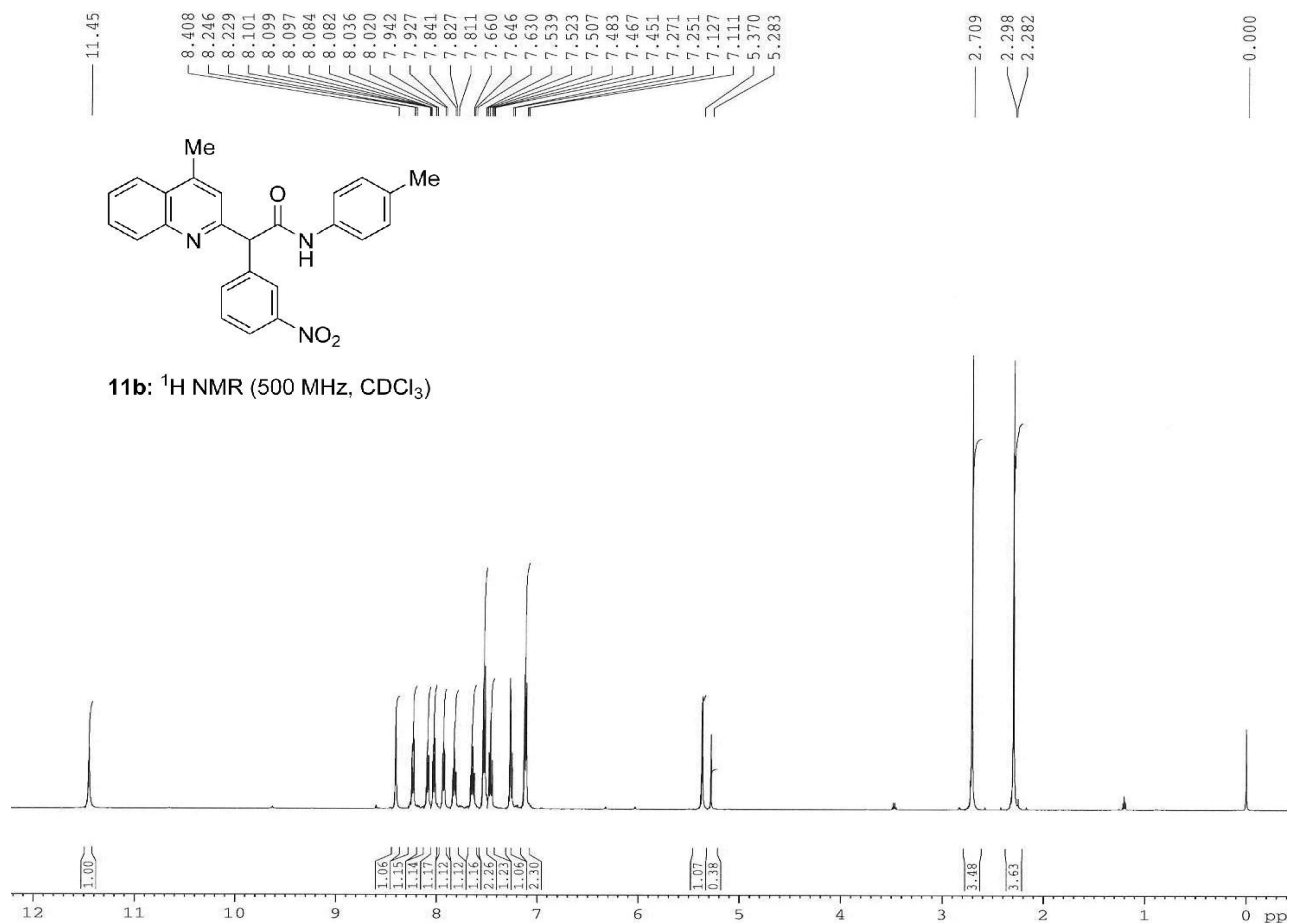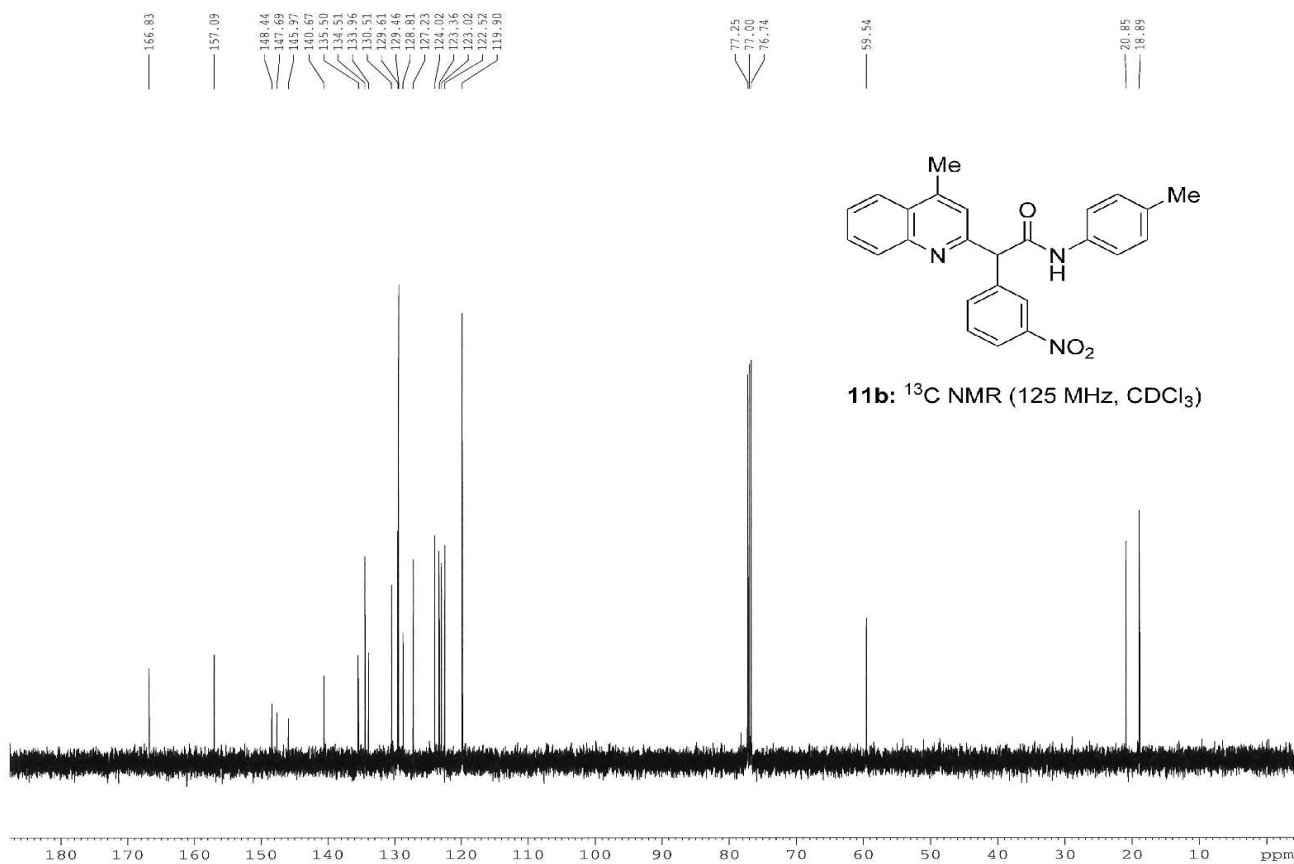



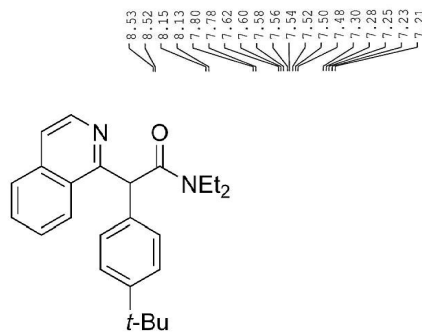

**11c:**  $^1\text{H}$  NMR (400 MHz,  $\text{CDCl}_3$ )

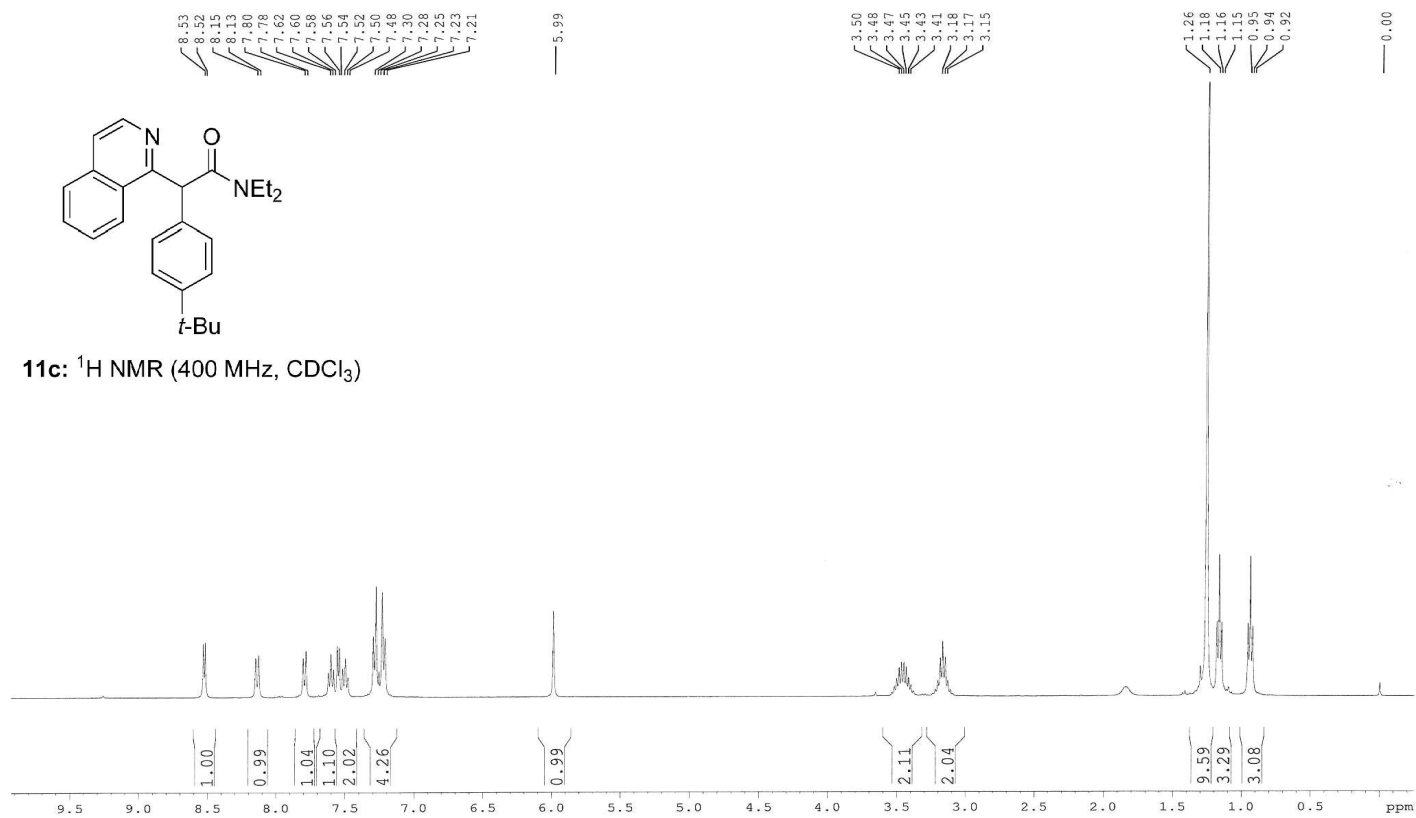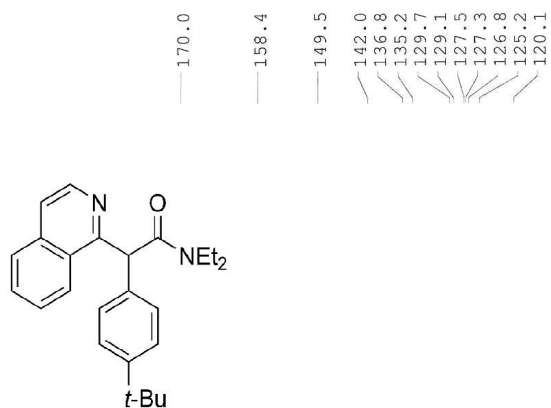

**11c:**  $^{13}\text{C}$  NMR (100 MHz,  $\text{CDCl}_3$ )

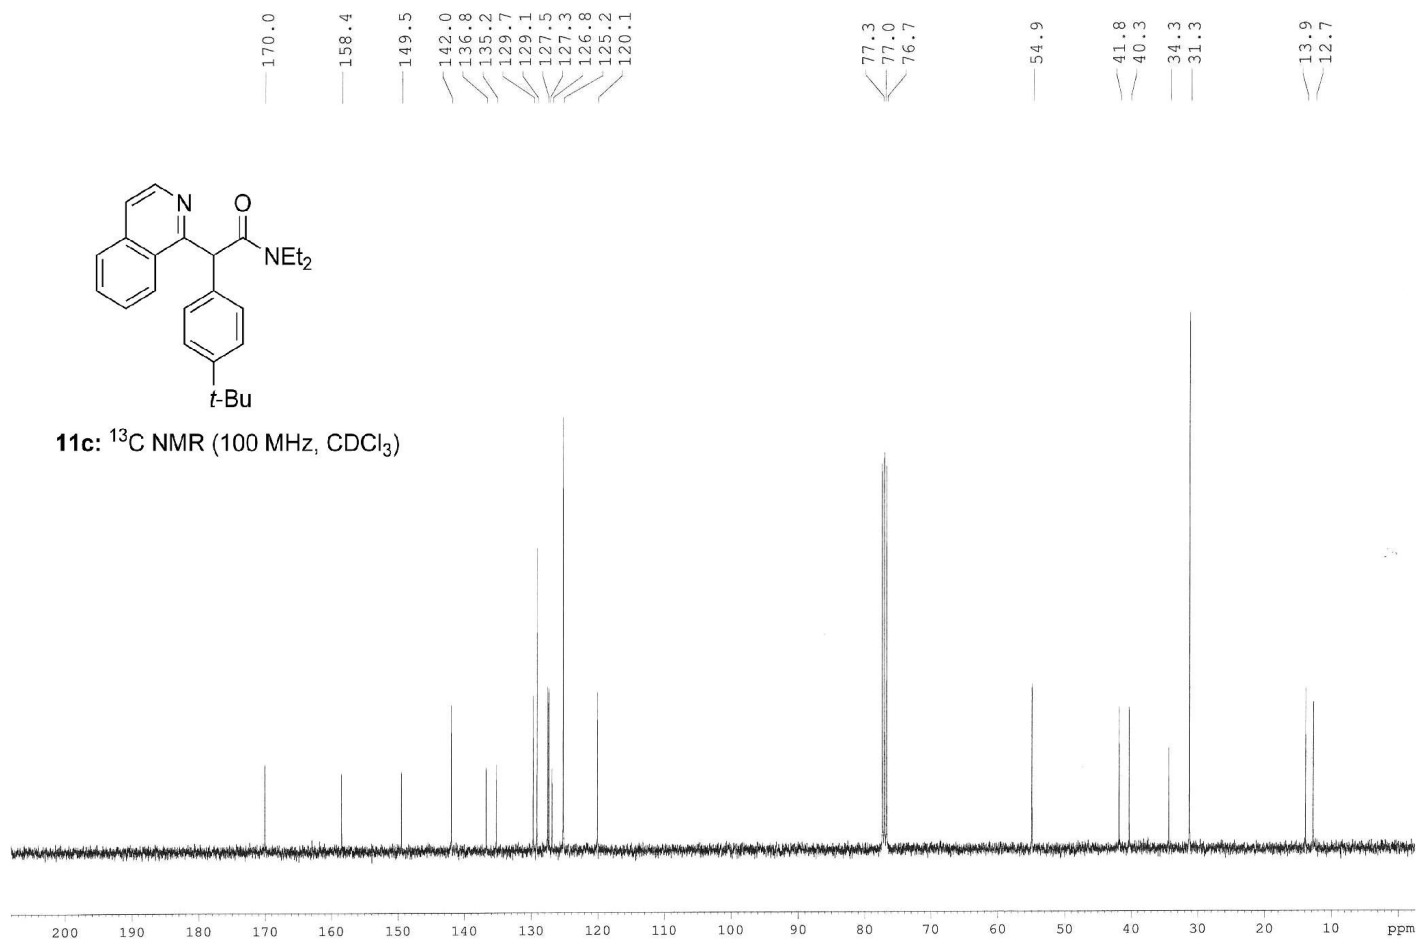

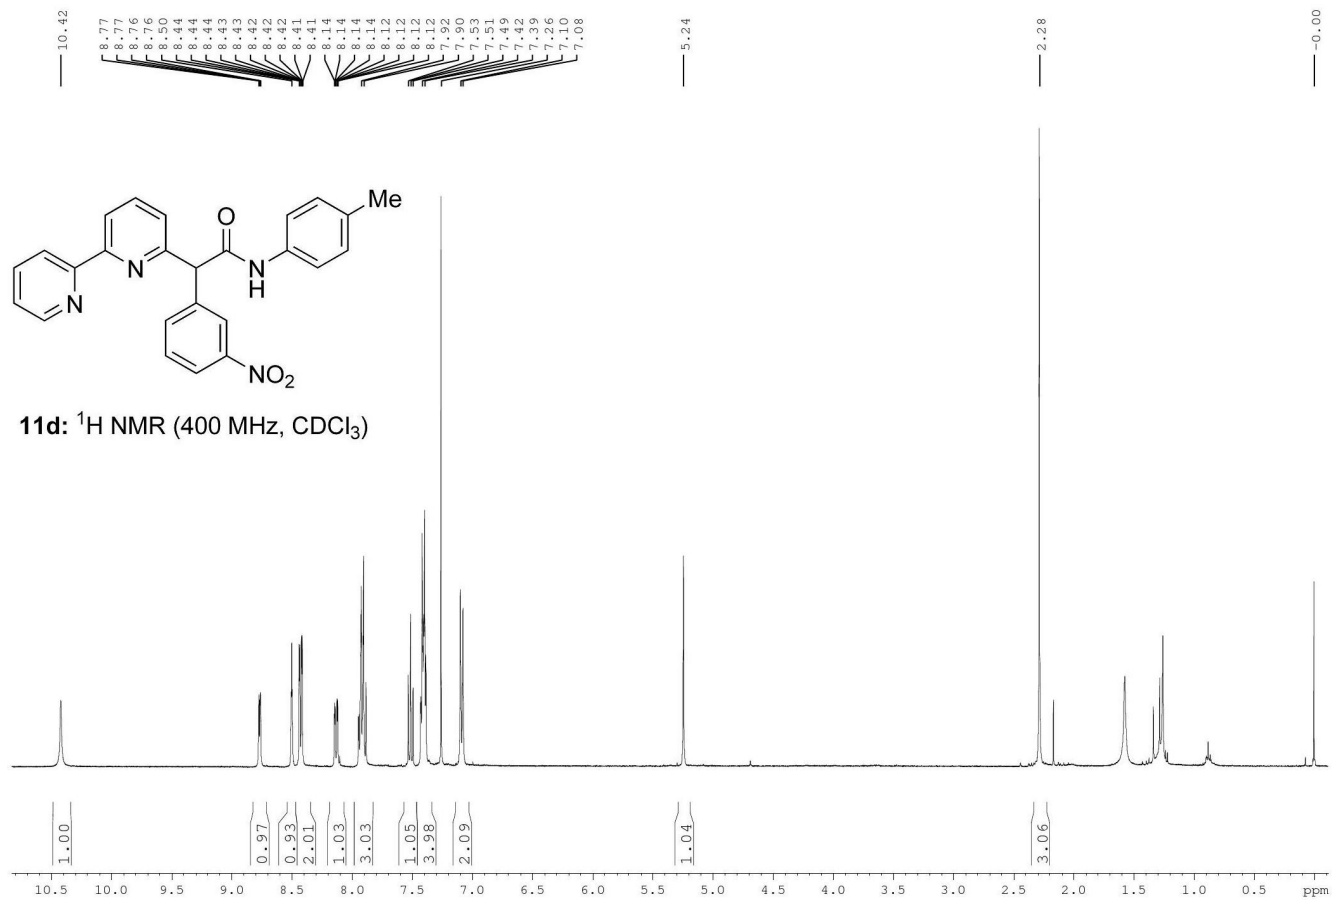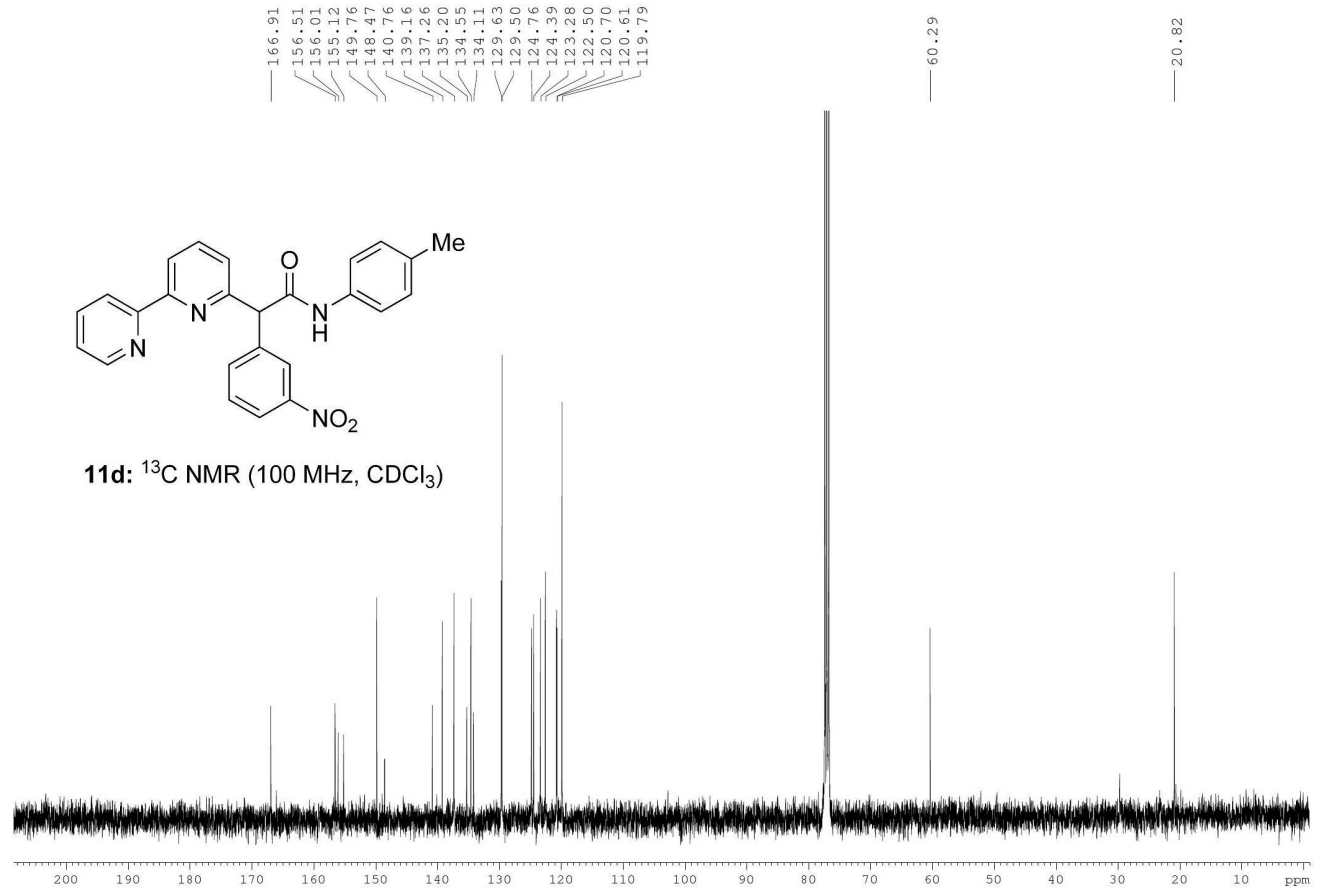

10.69

8.60  
8.58  
7.61  
7.59  
7.55  
7.53  
7.47  
7.45  
7.34  
7.34  
7.34  
7.29  
7.28  
7.28  
7.27  
7.26  
7.26  
7.24  
7.10  
7.08

5.12

2.28

1.30

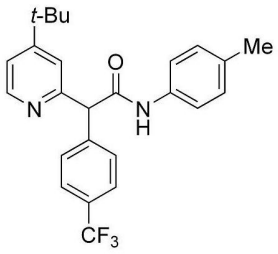

11e: <sup>1</sup>H NMR (400 MHz, CDCl<sub>3</sub>)

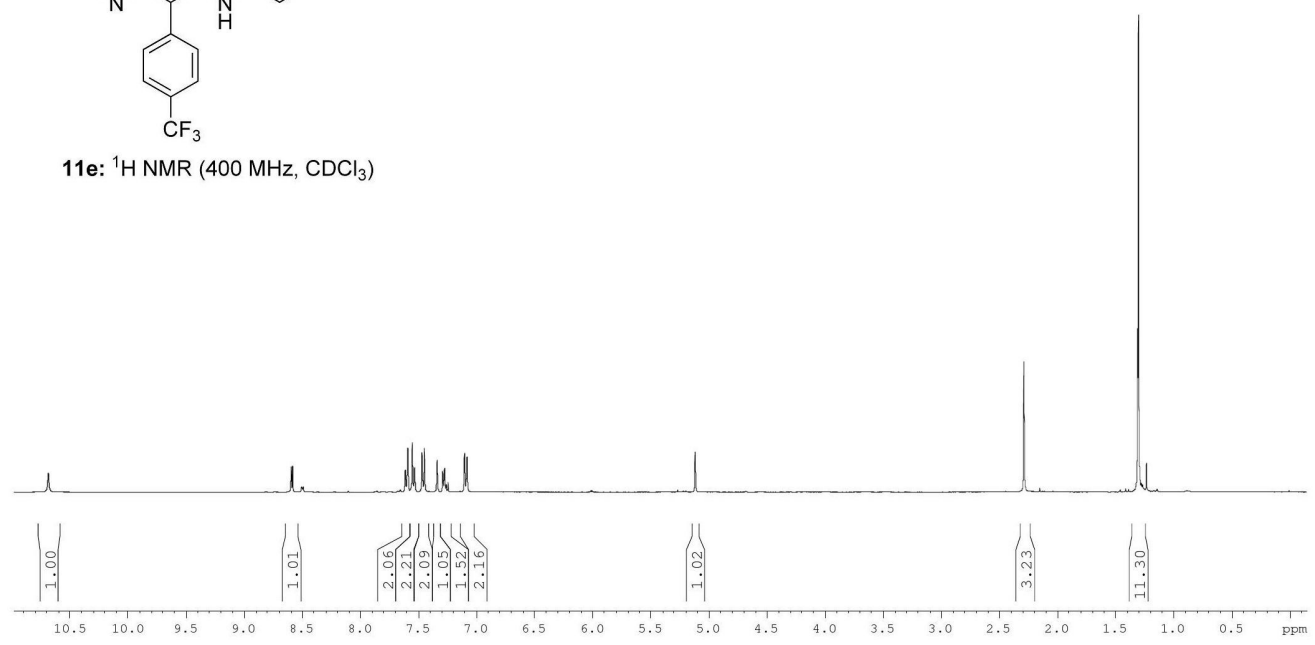

167.7  
162.4  
157.4  
149.6  
148.8  
143.2  
135.6  
133.8  
129.4  
128.4  
125.6  
125.6  
125.5  
122.7  
122.0  
120.7  
120.0  
119.9

77.4  
77.0  
76.7

60.9

34.9  
30.4

20.8

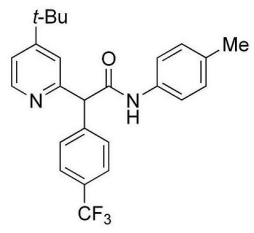

11e: <sup>13</sup>C NMR (100 MHz, CDCl<sub>3</sub>)

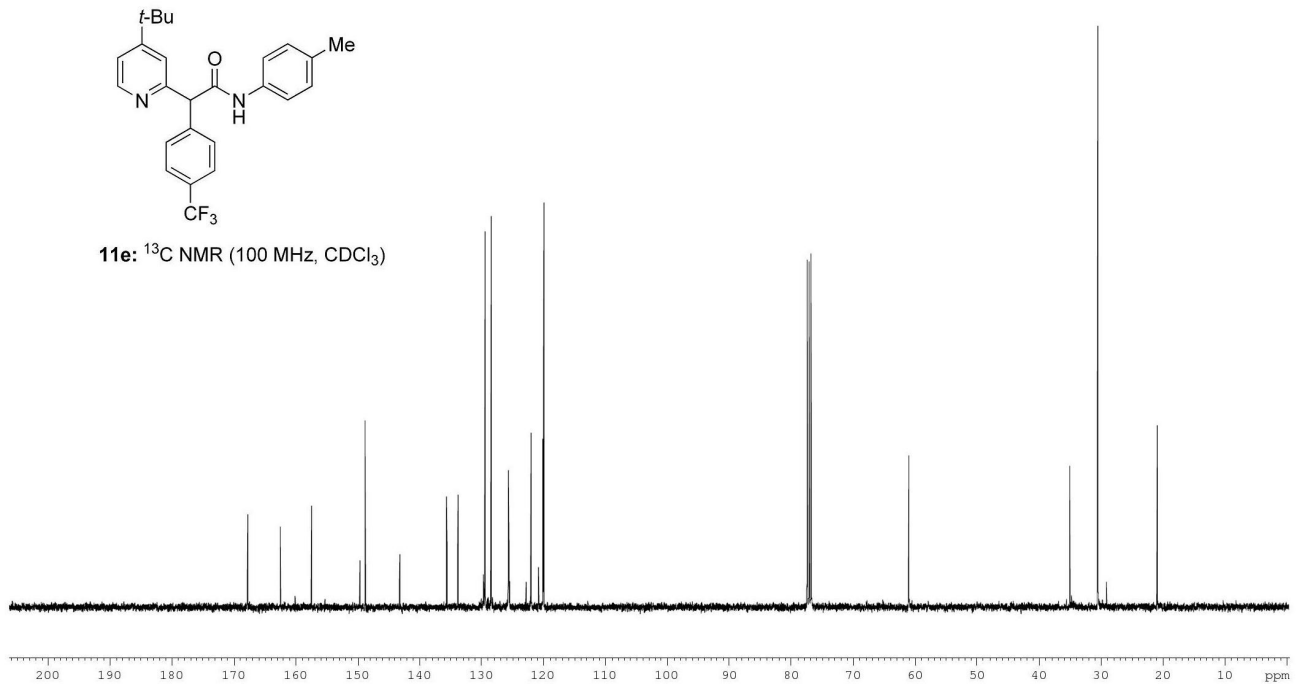

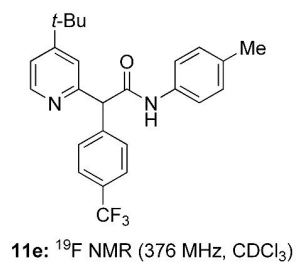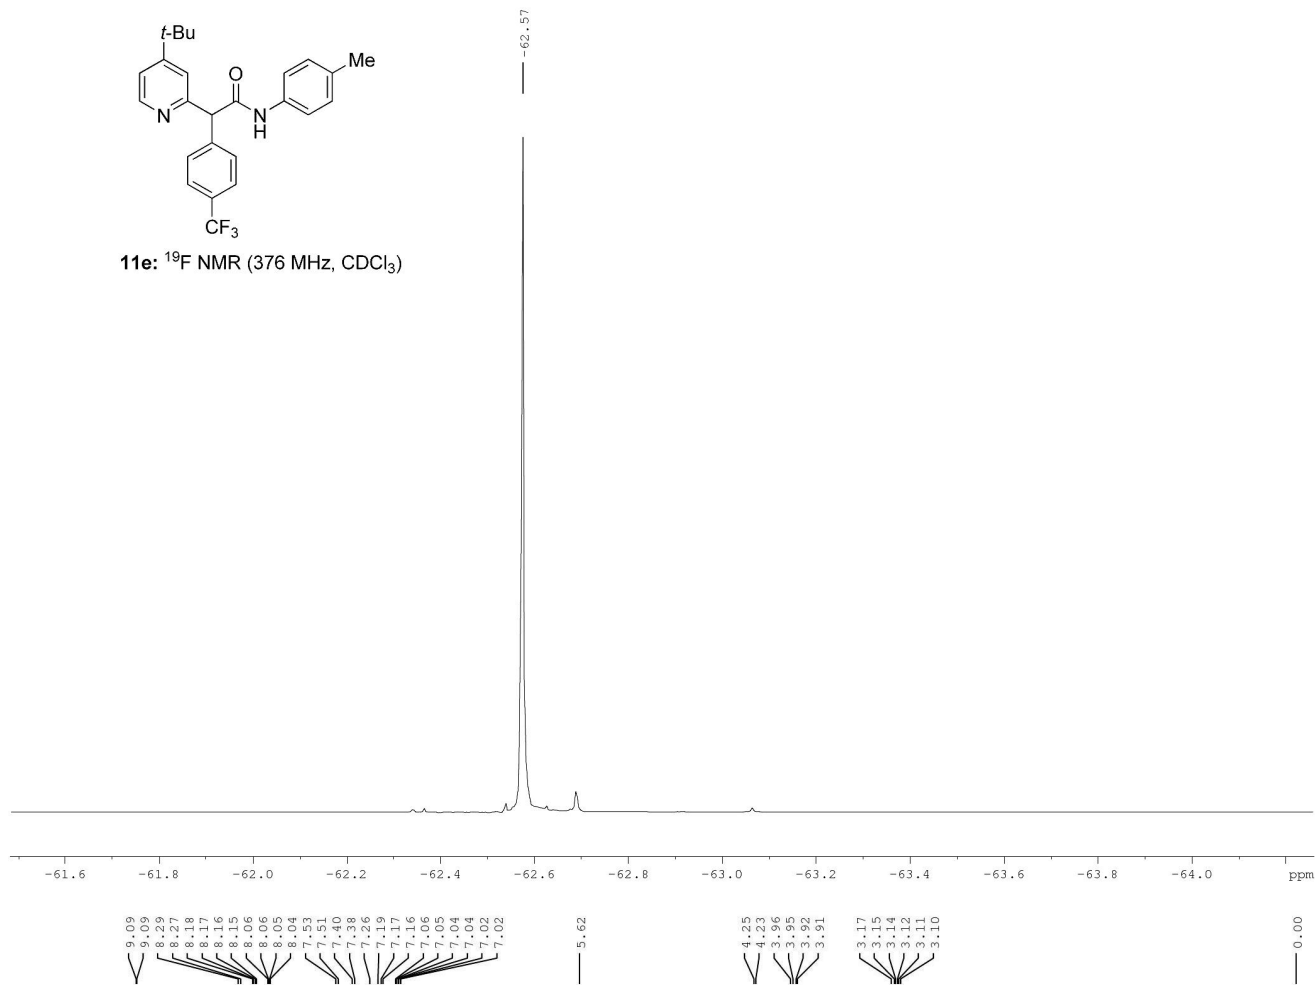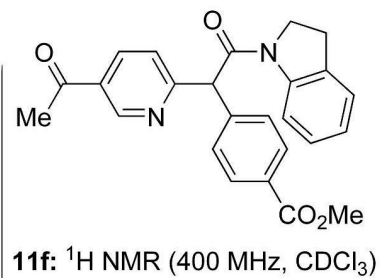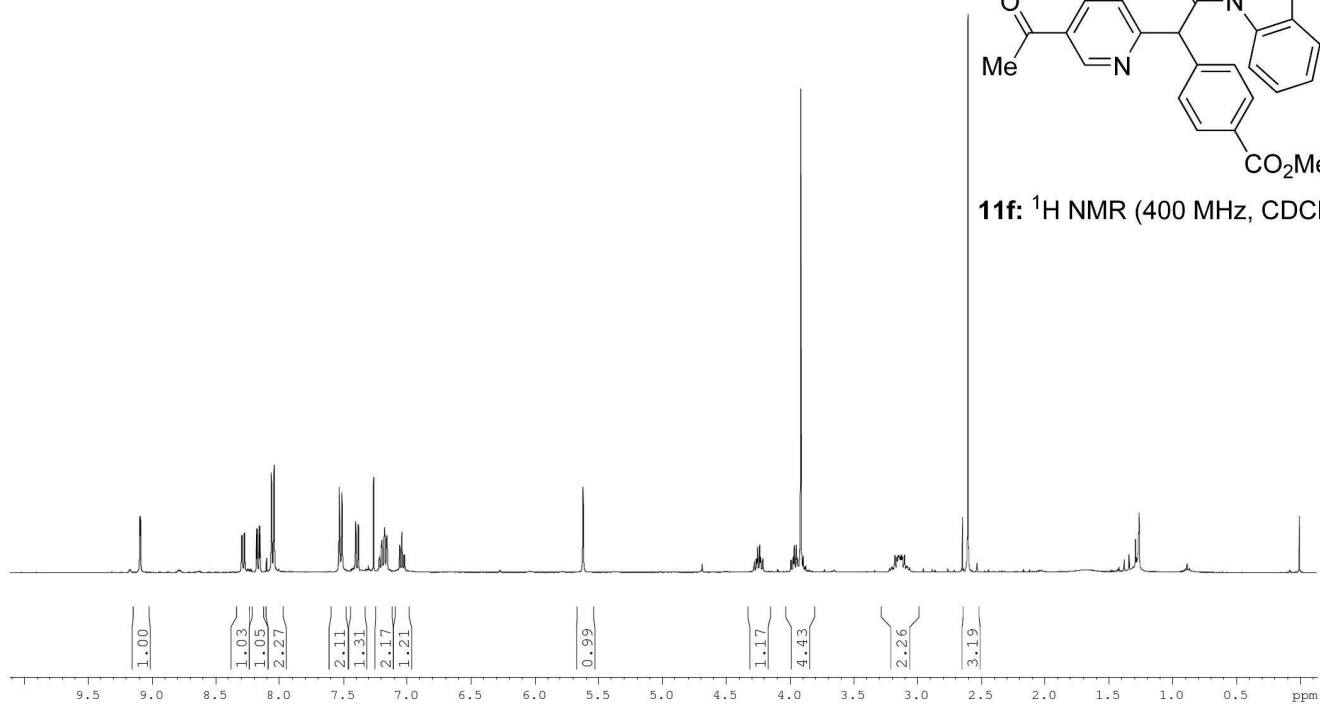

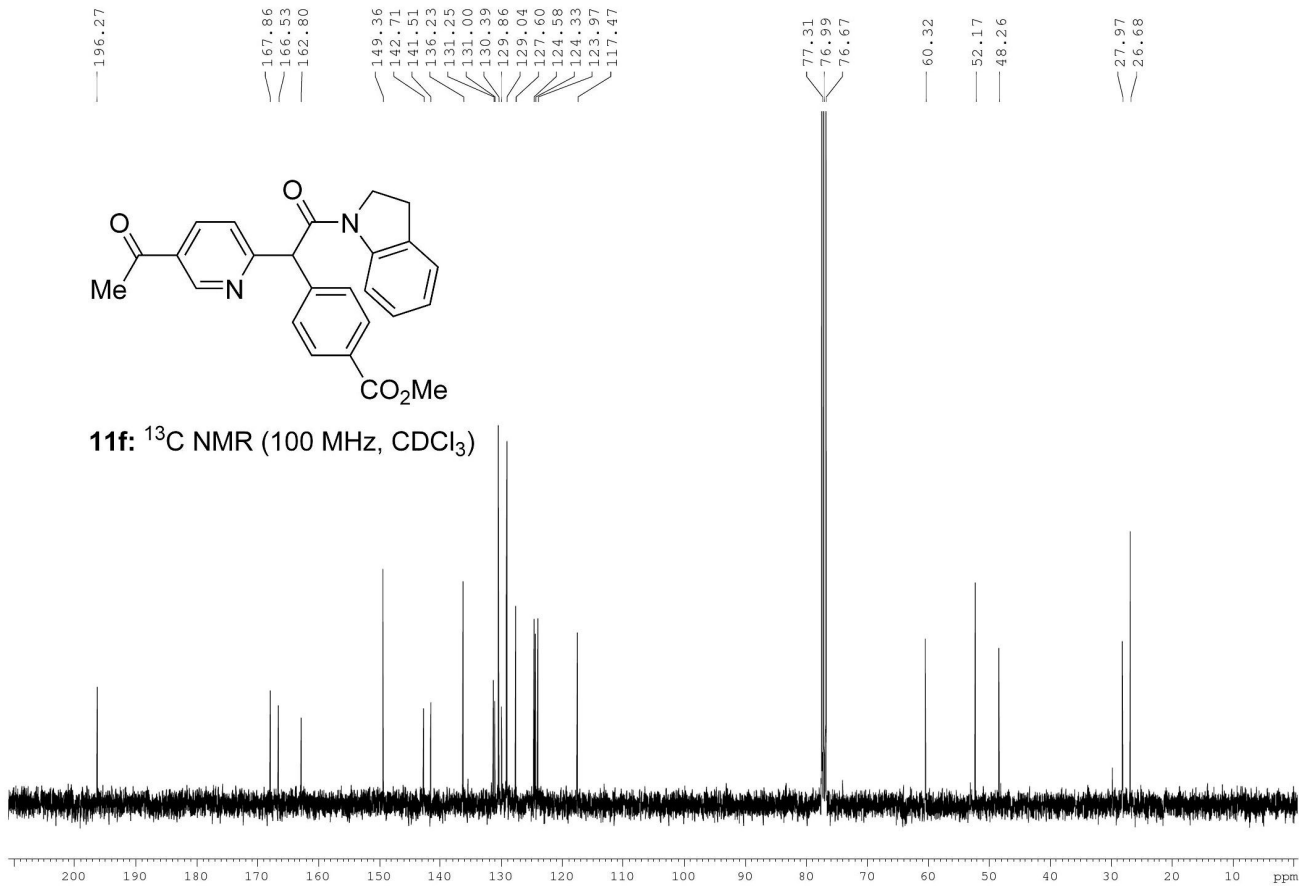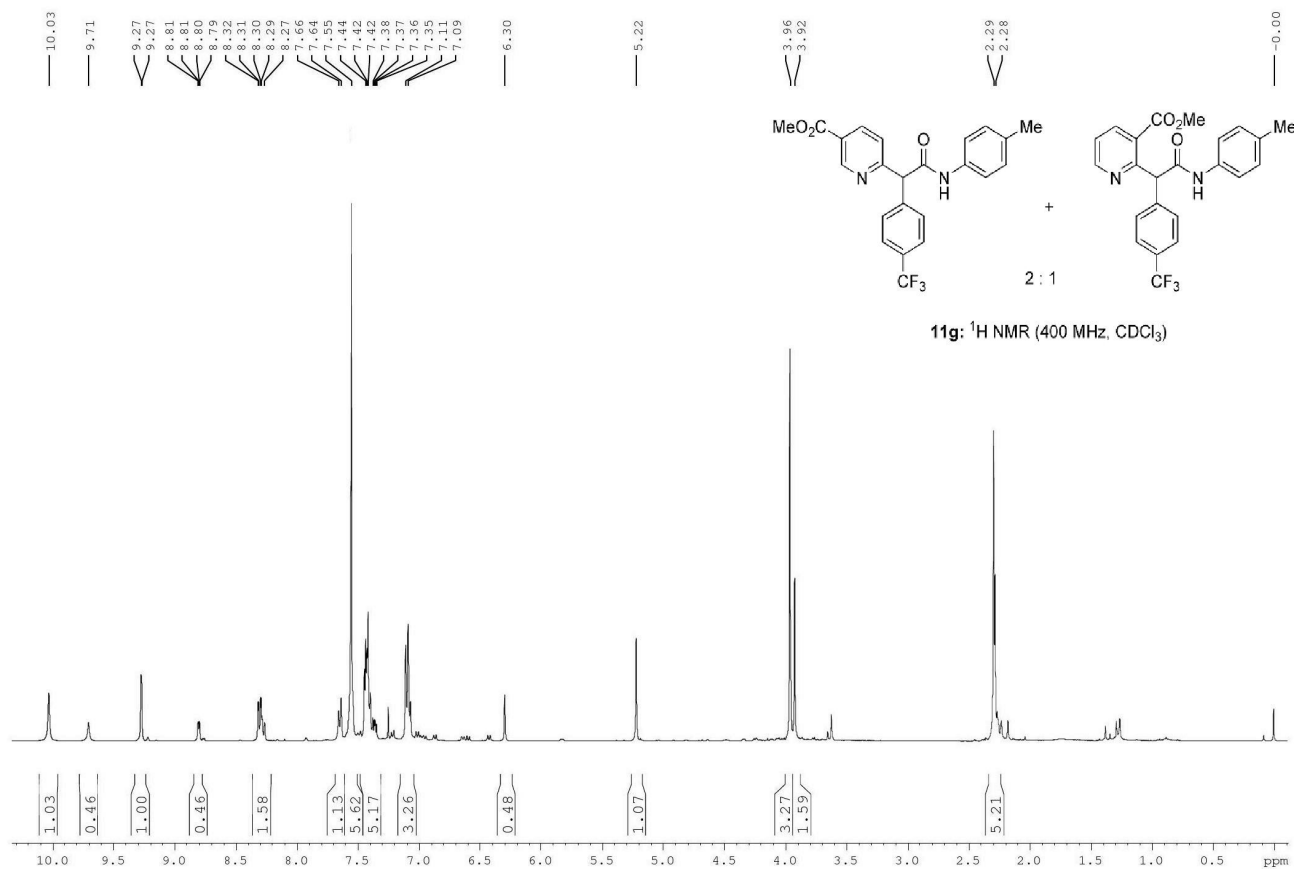

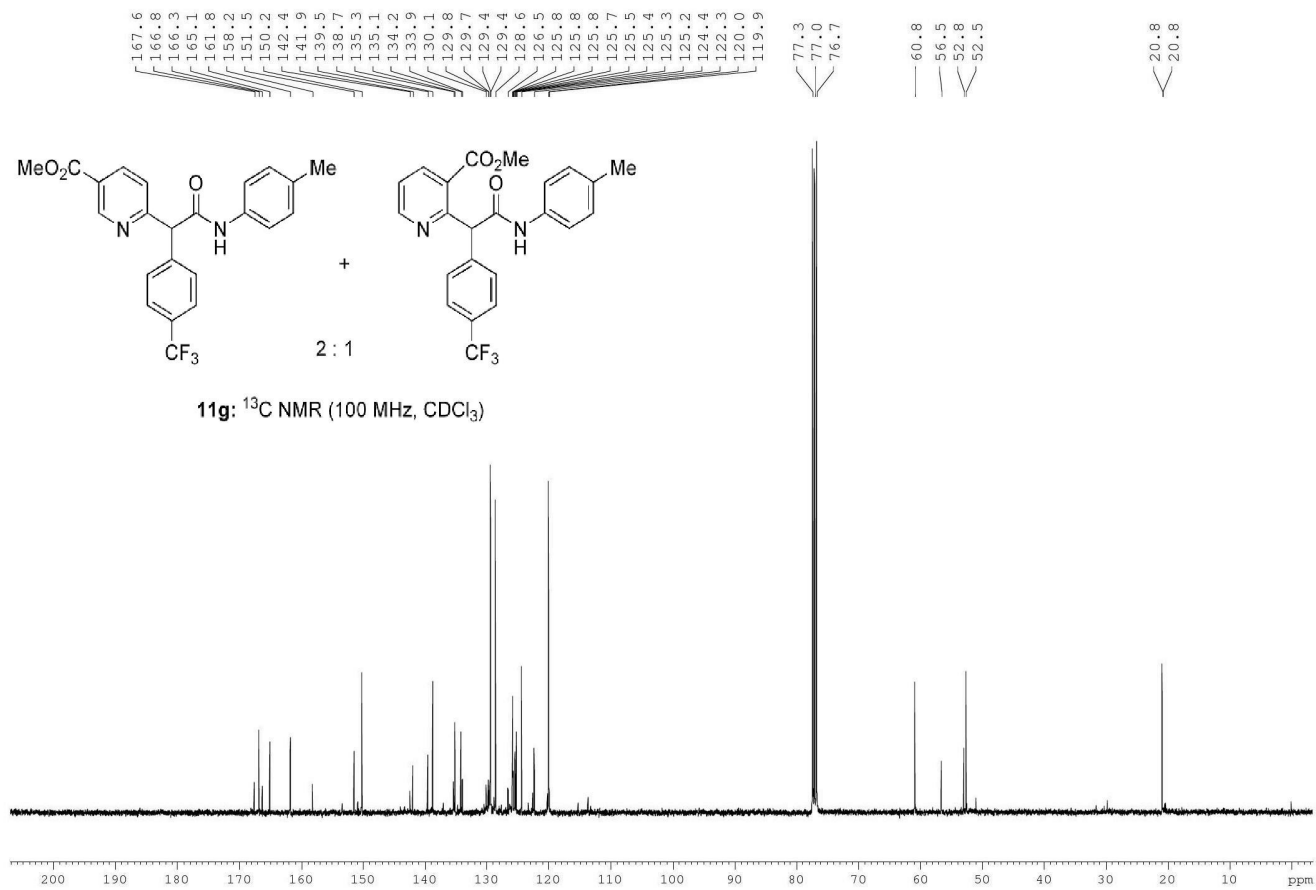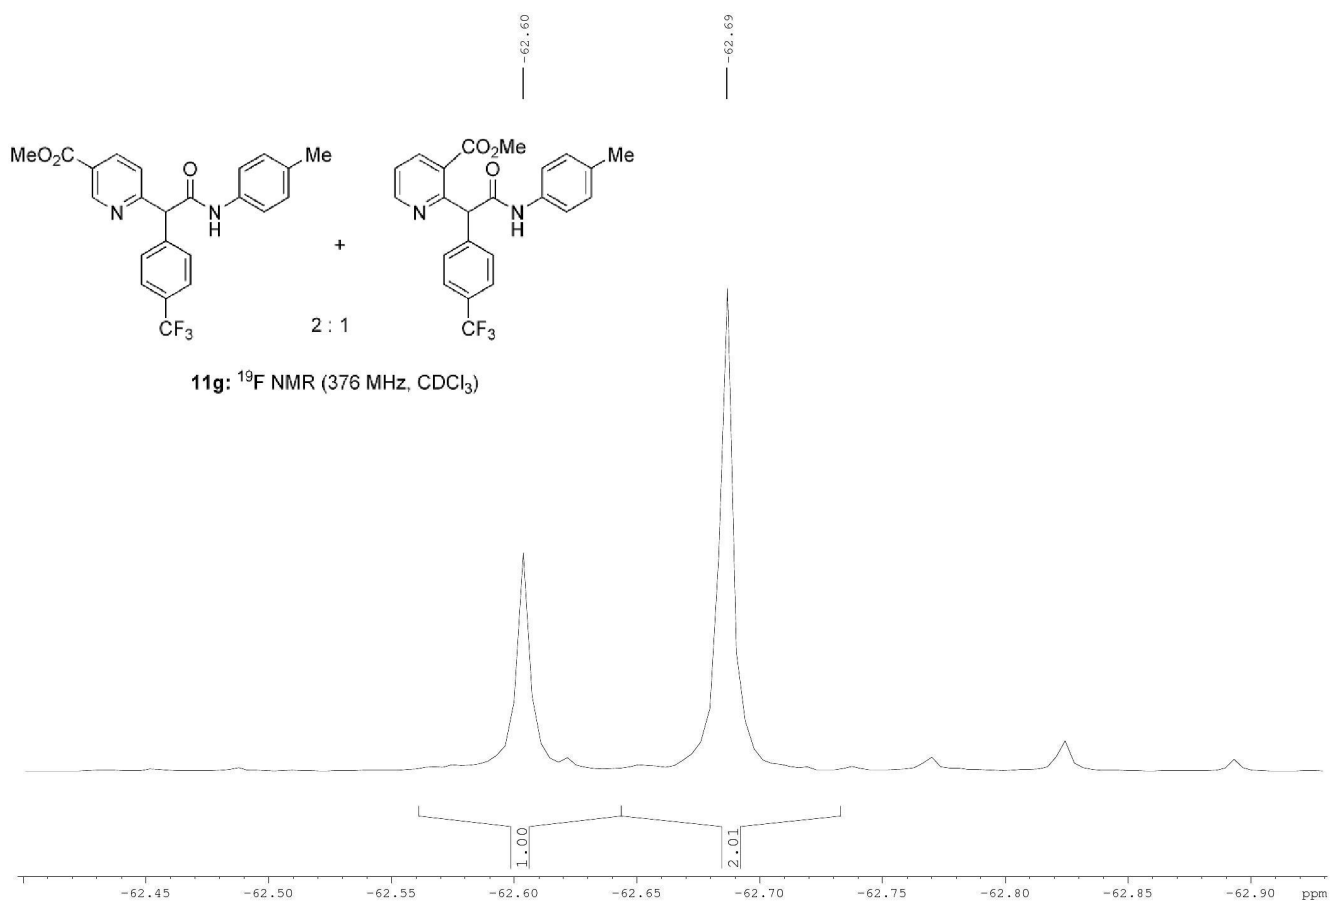

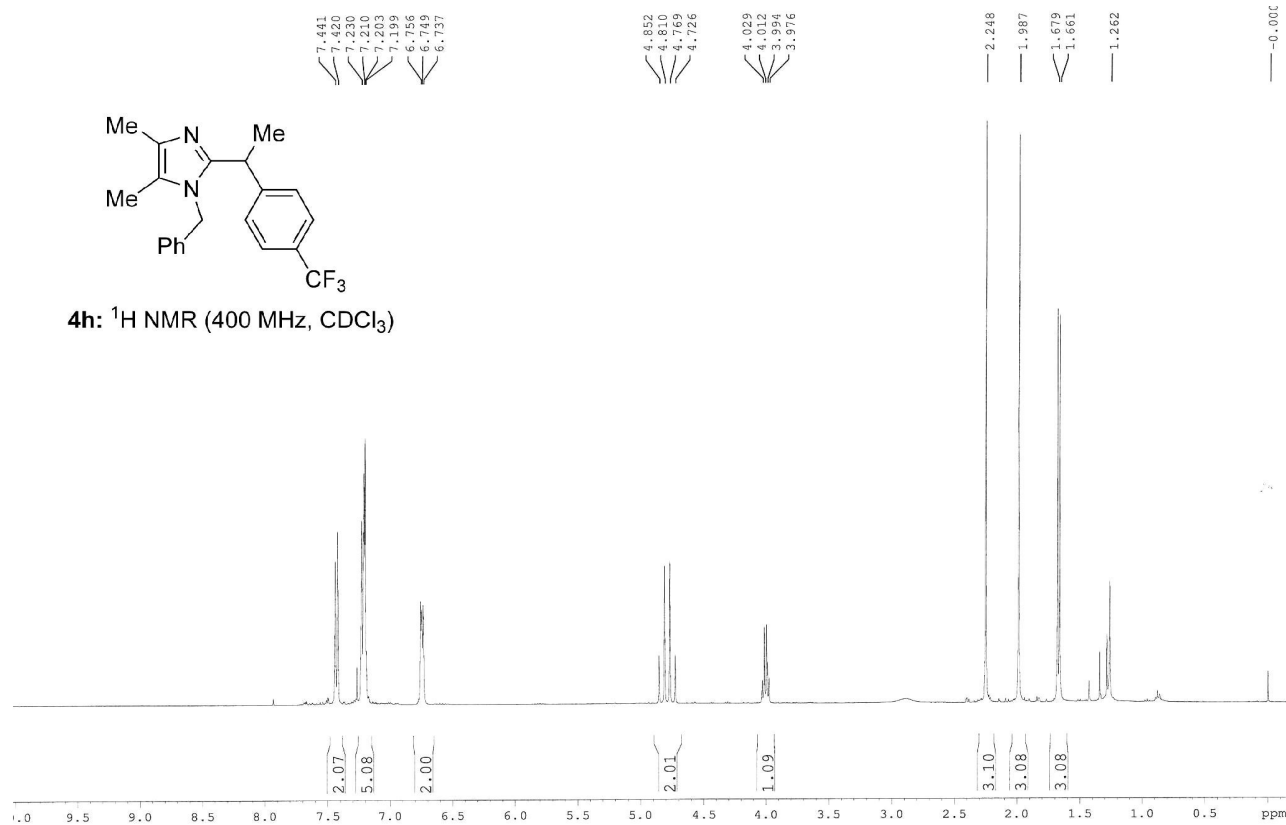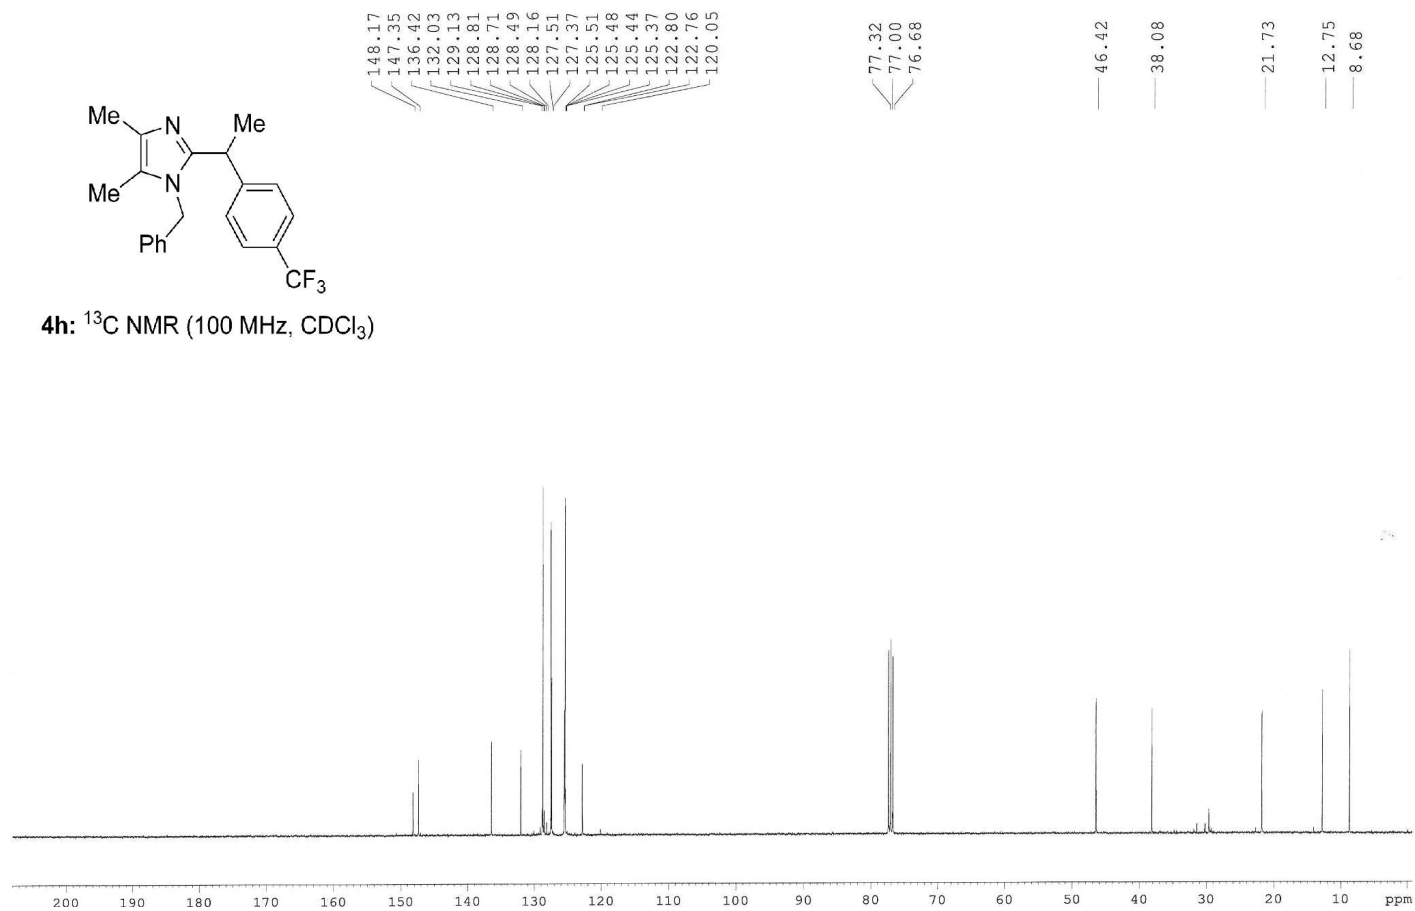

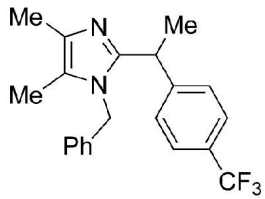

4h:  $^{19}\text{F}$  NMR (376 MHz,  $\text{CDCl}_3$ )

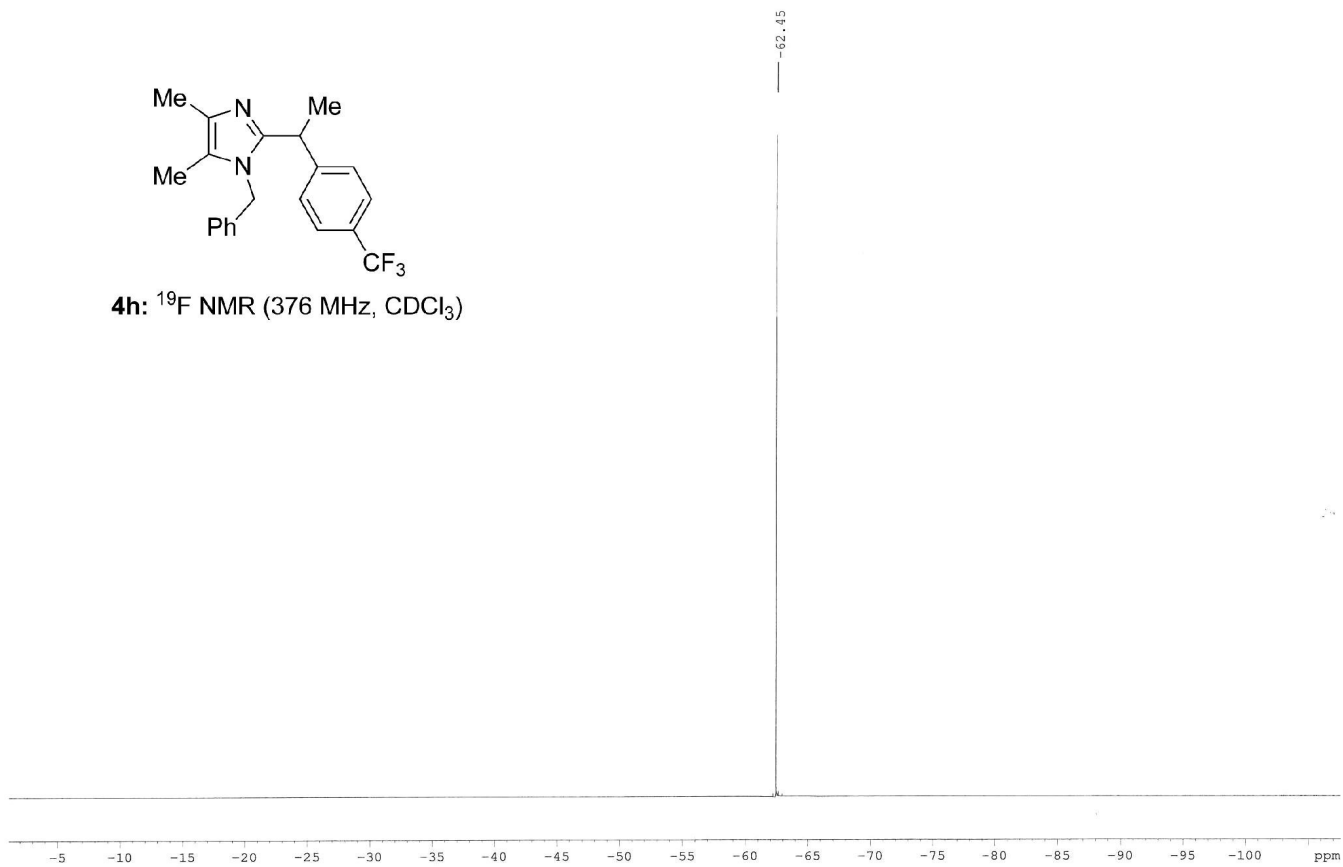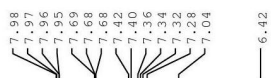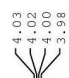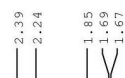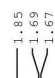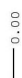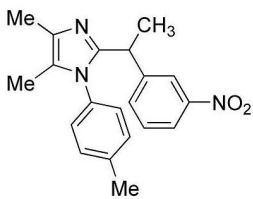

4i:  $^1\text{H}$  NMR (400 MHz,  $\text{CDCl}_3$ )

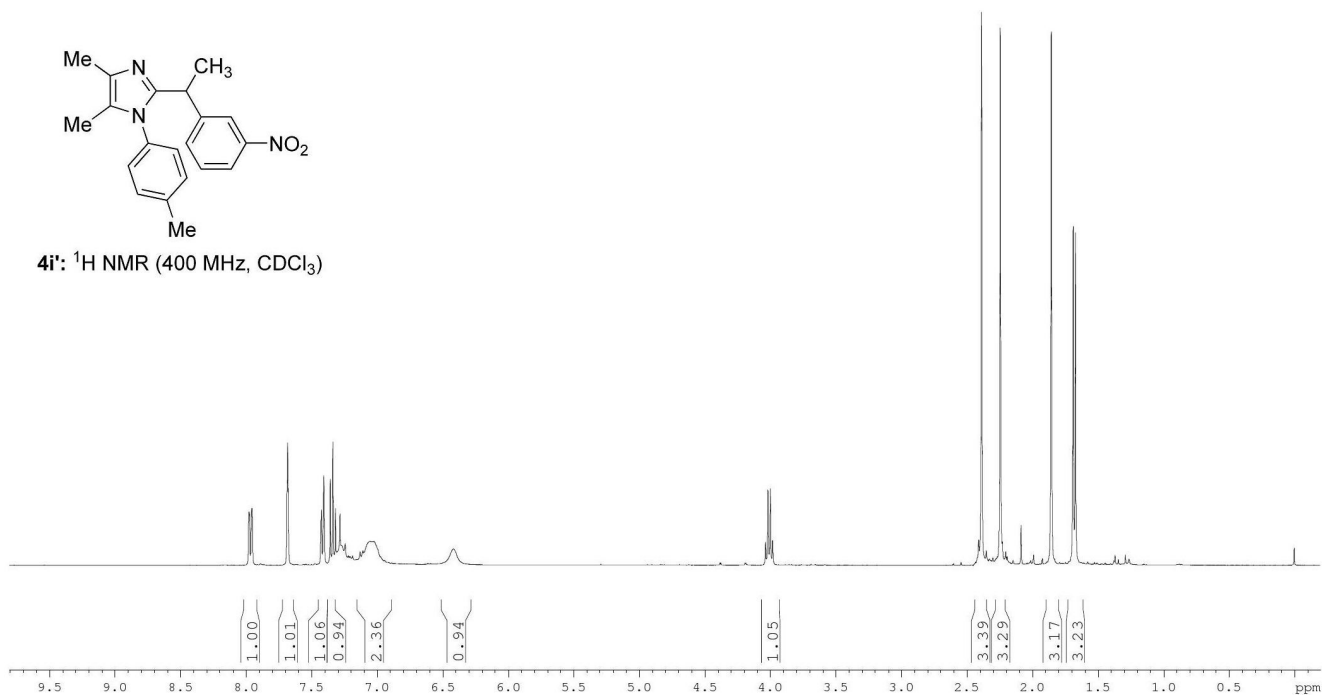

1.00

1.01

1.06

0.94

2.36

0.94

1.05

3.39

3.29

3.17

3.23



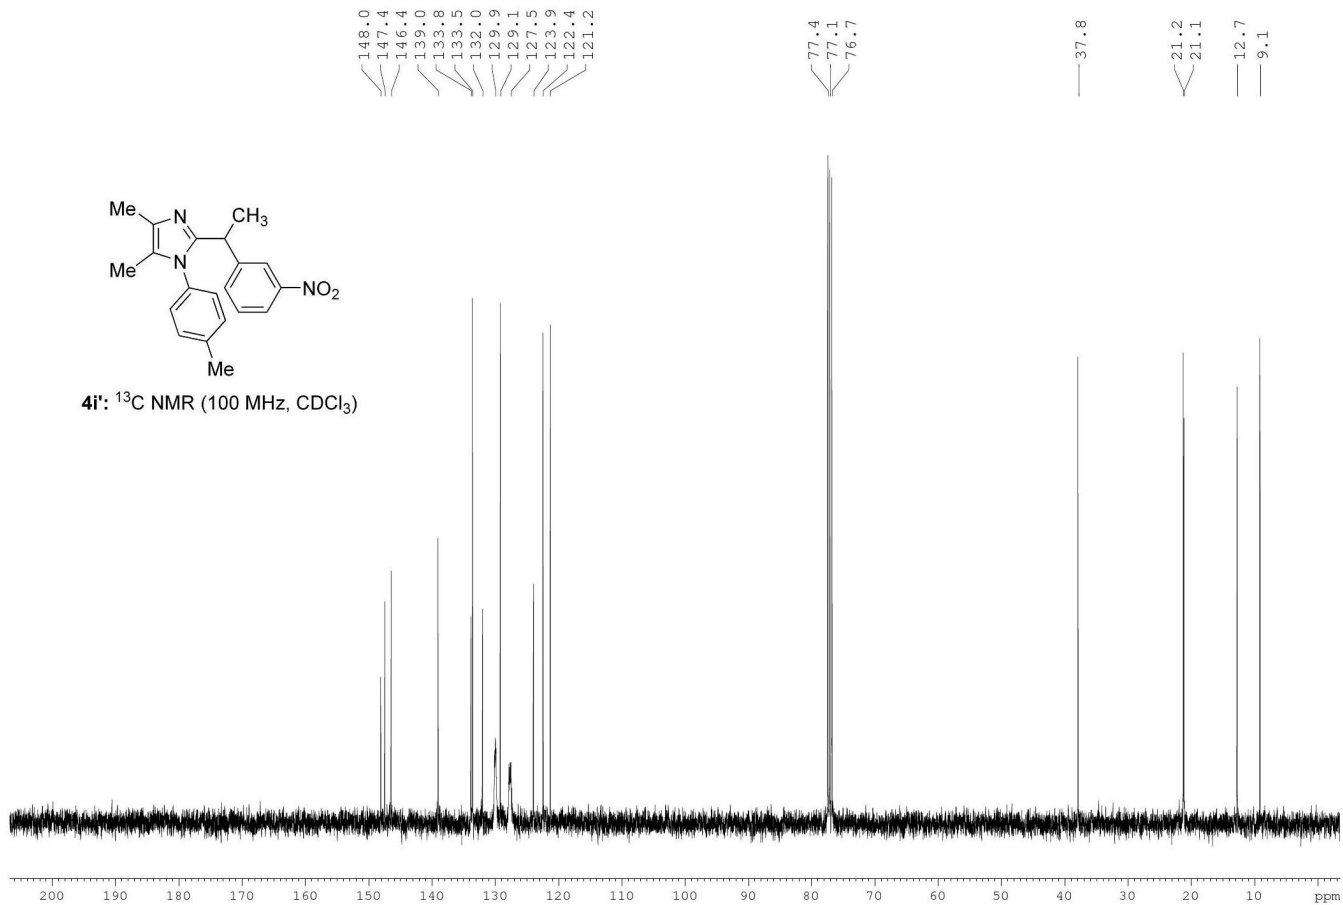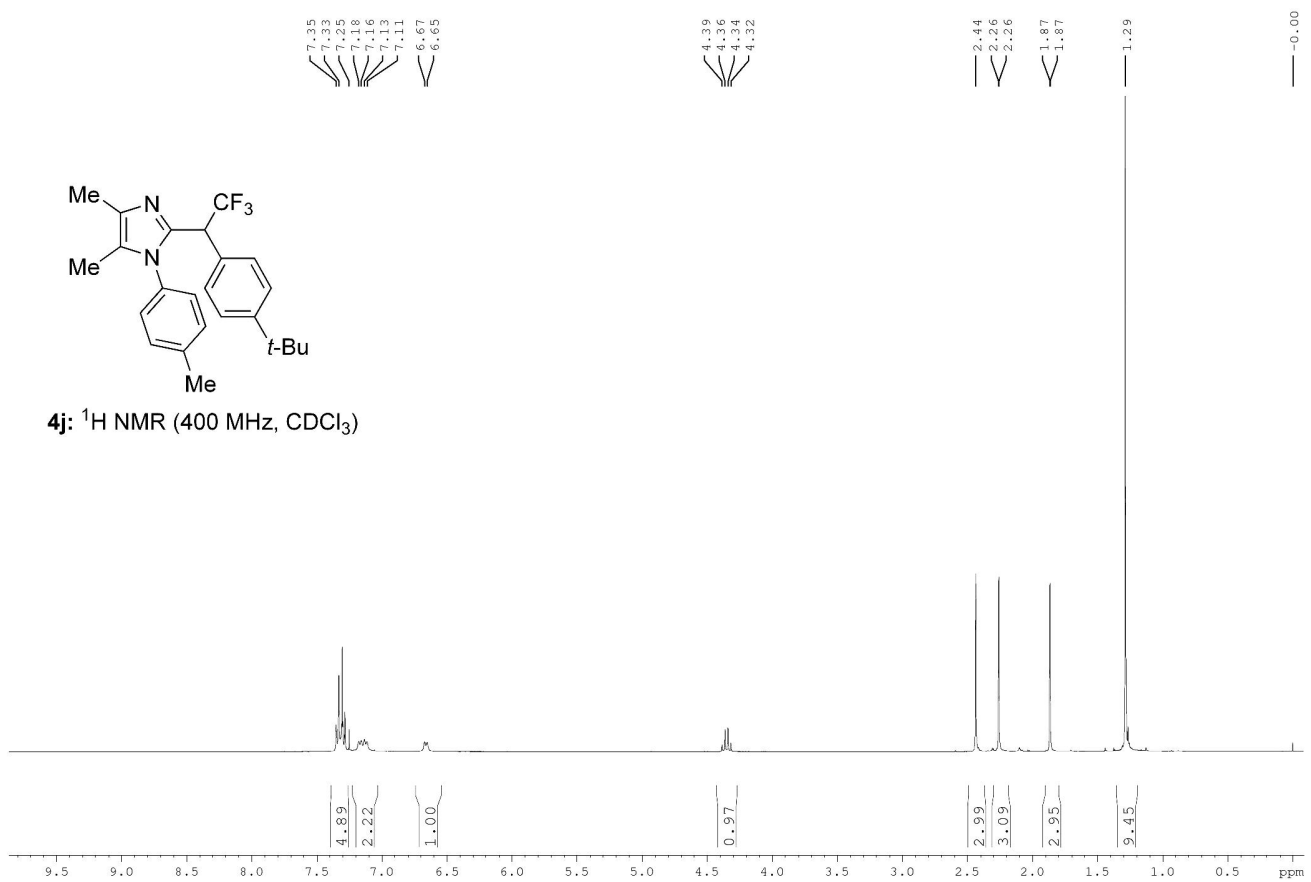

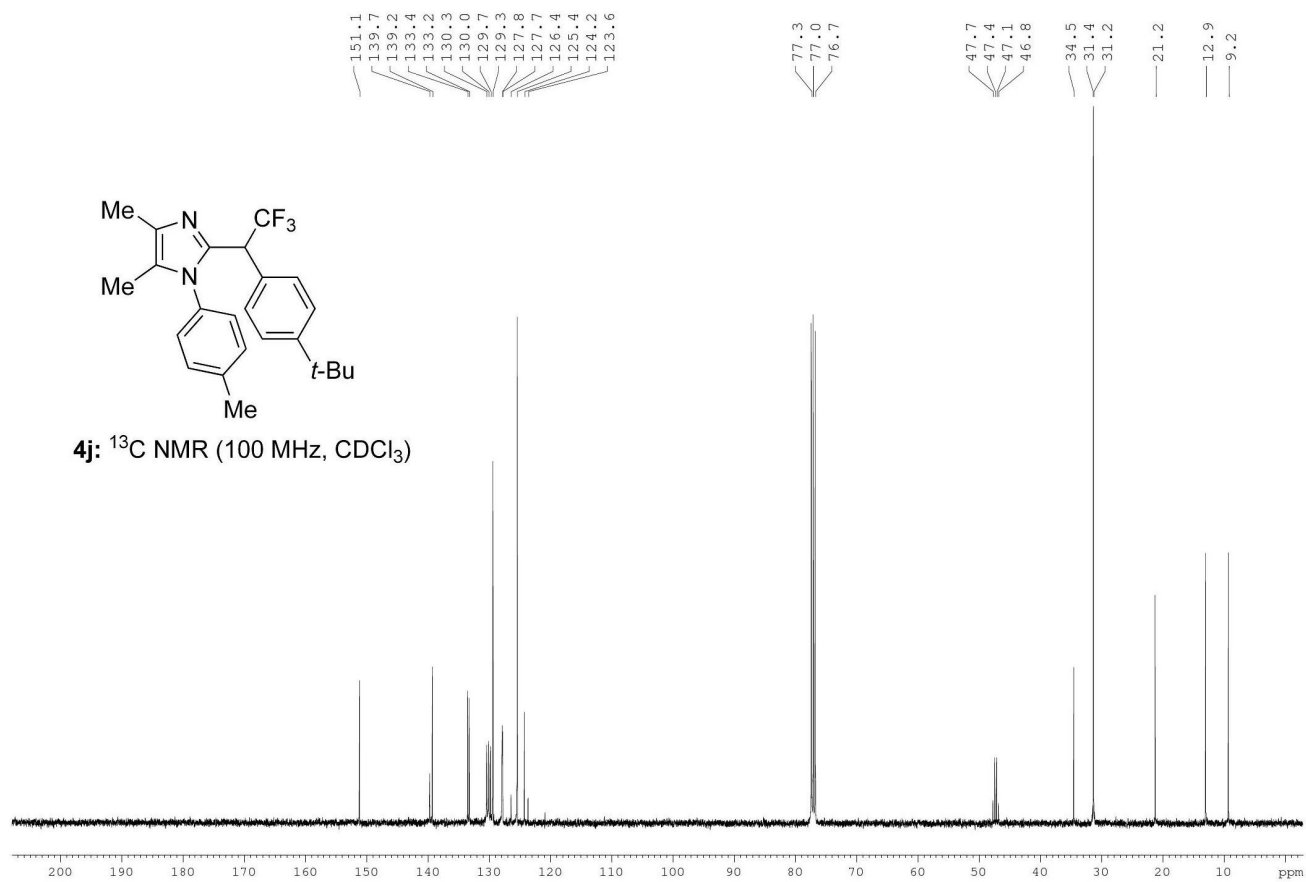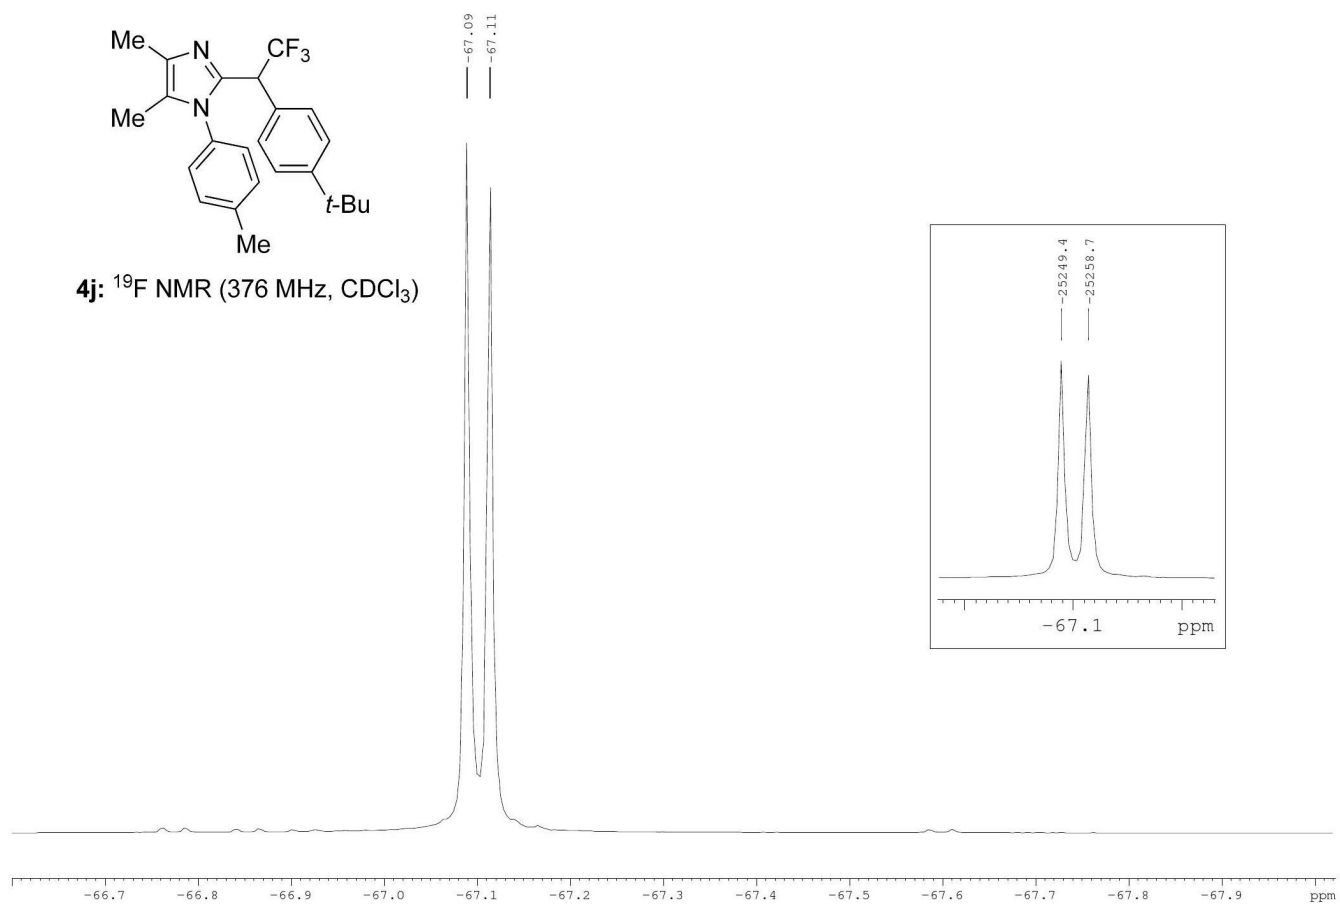

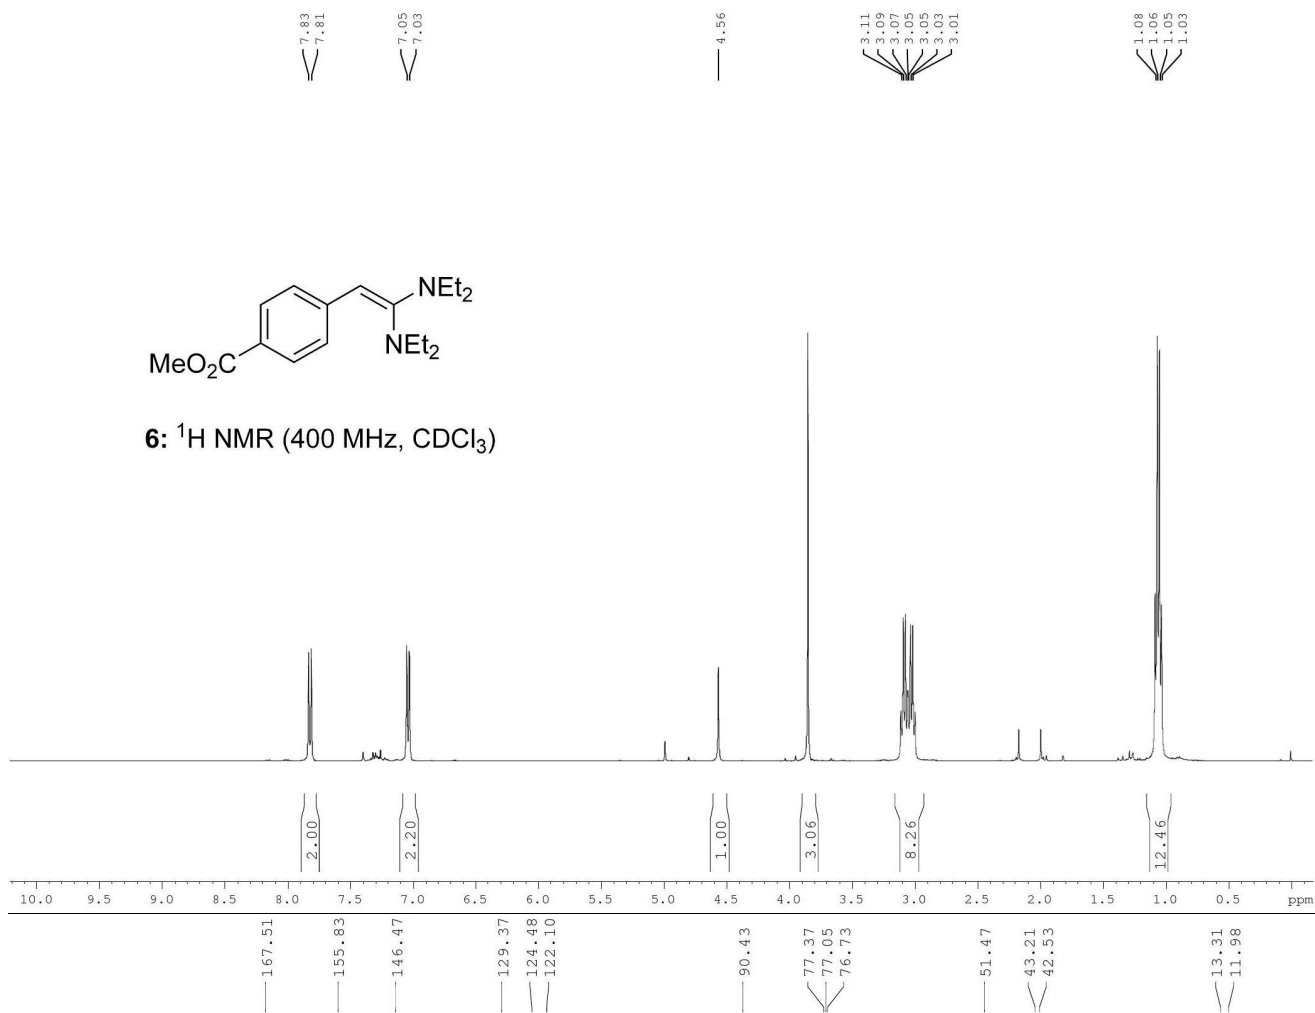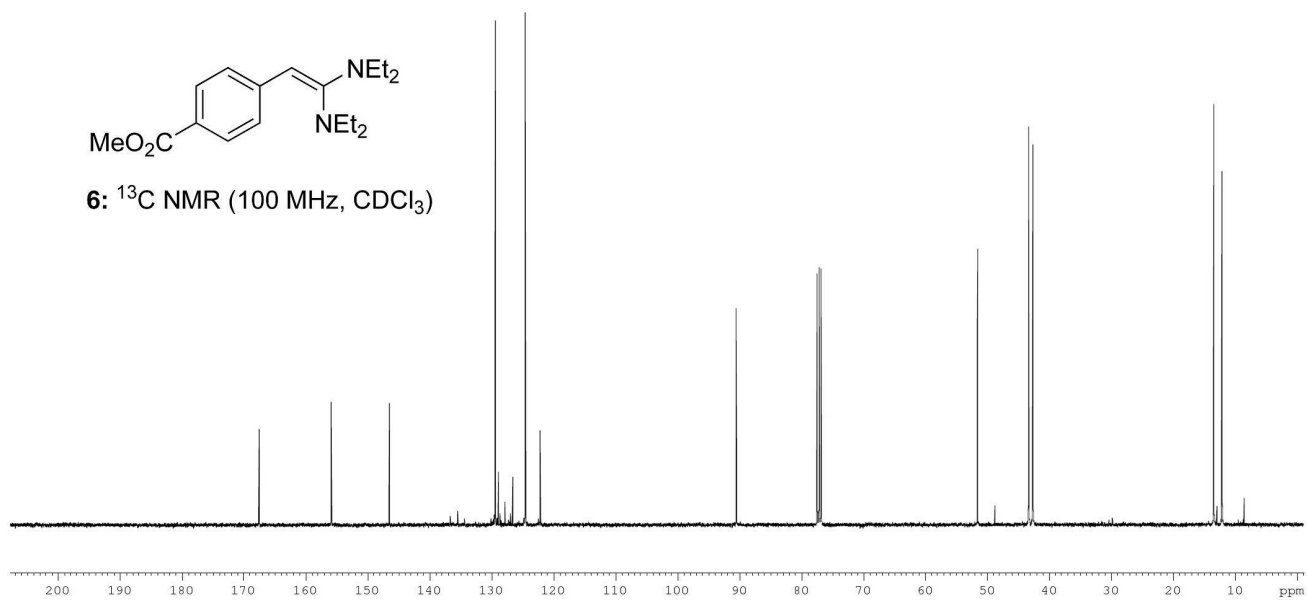

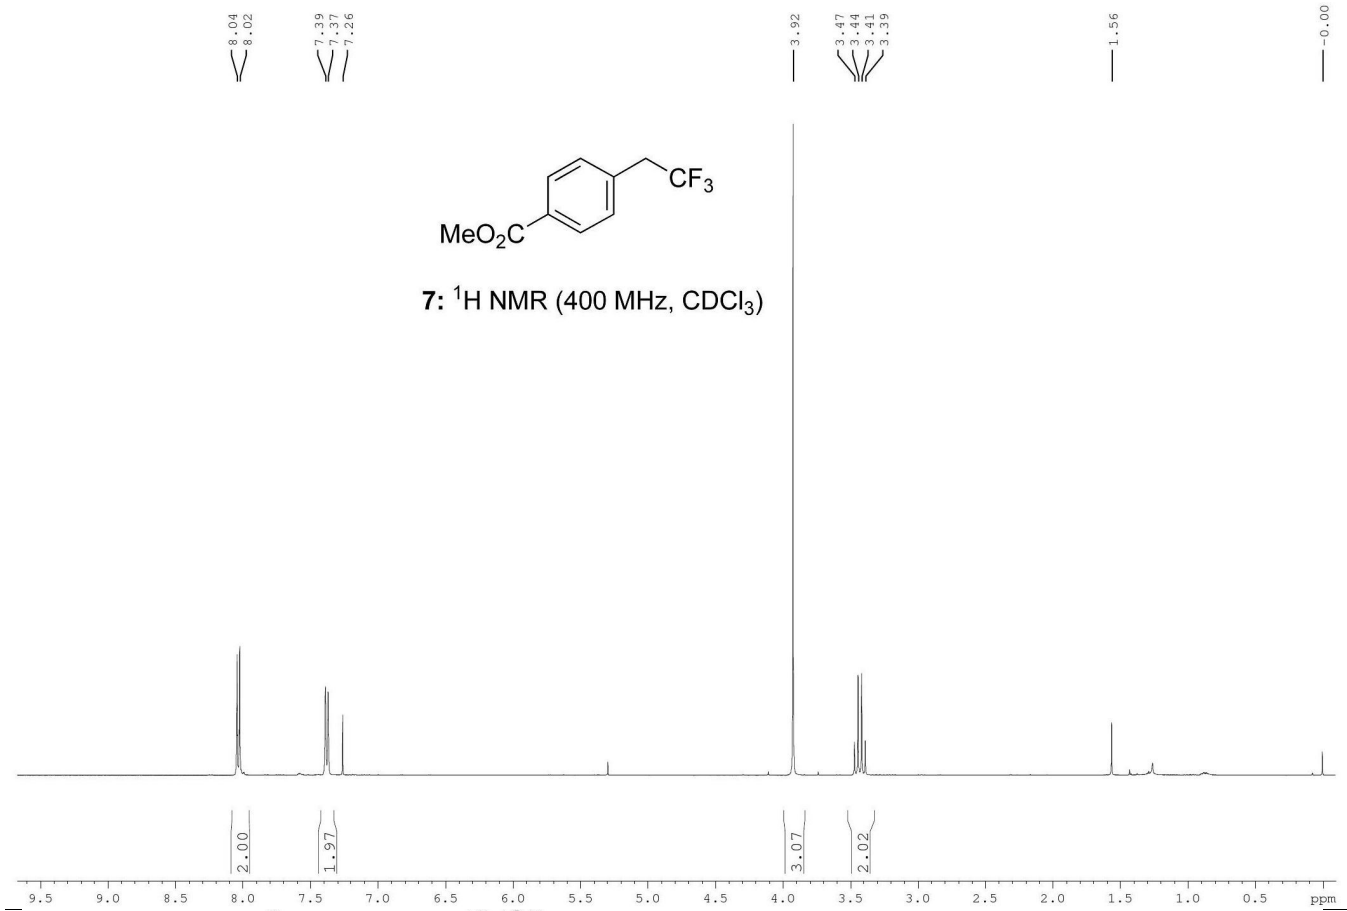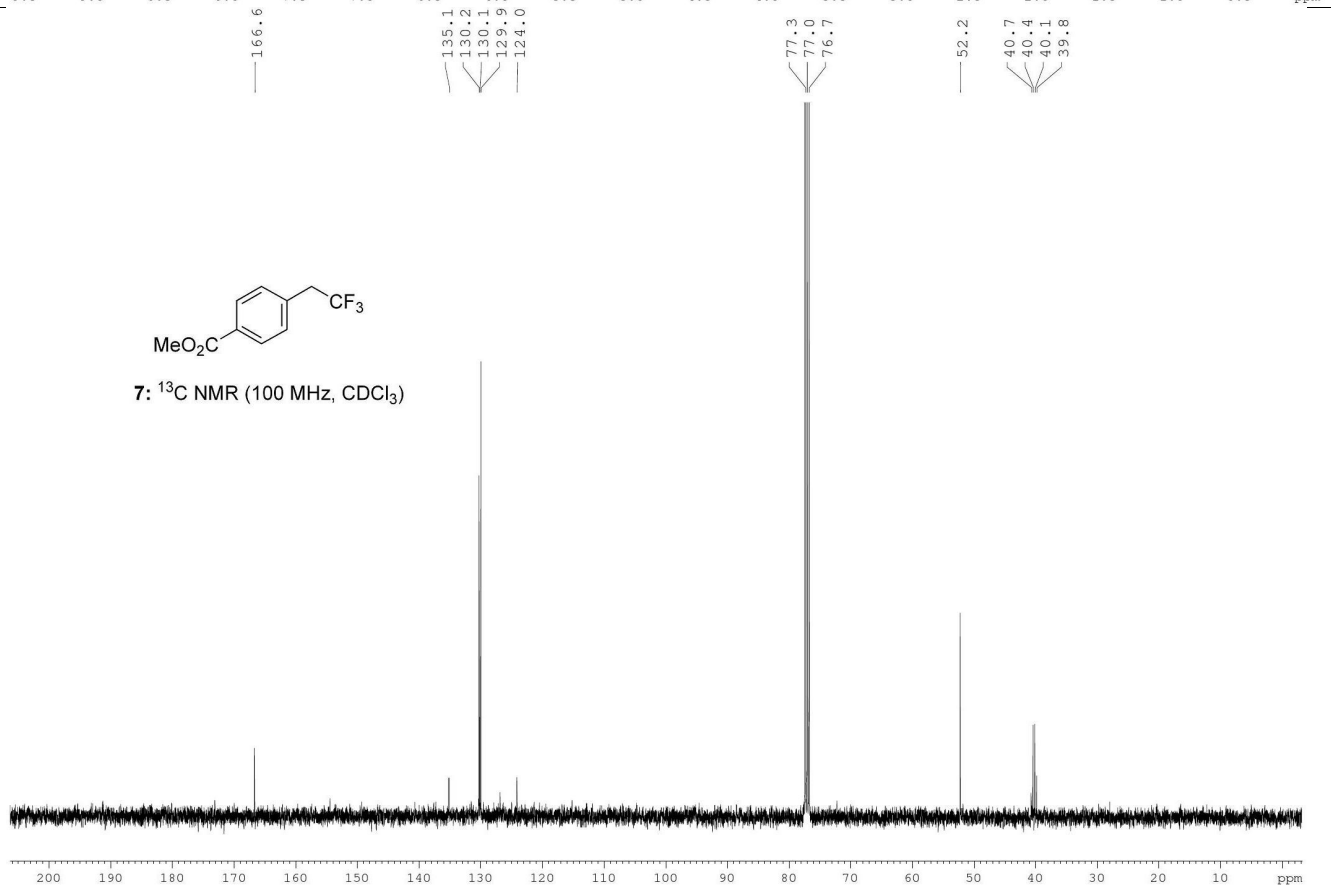

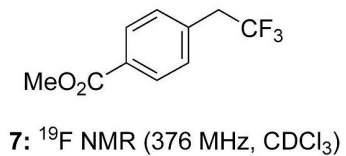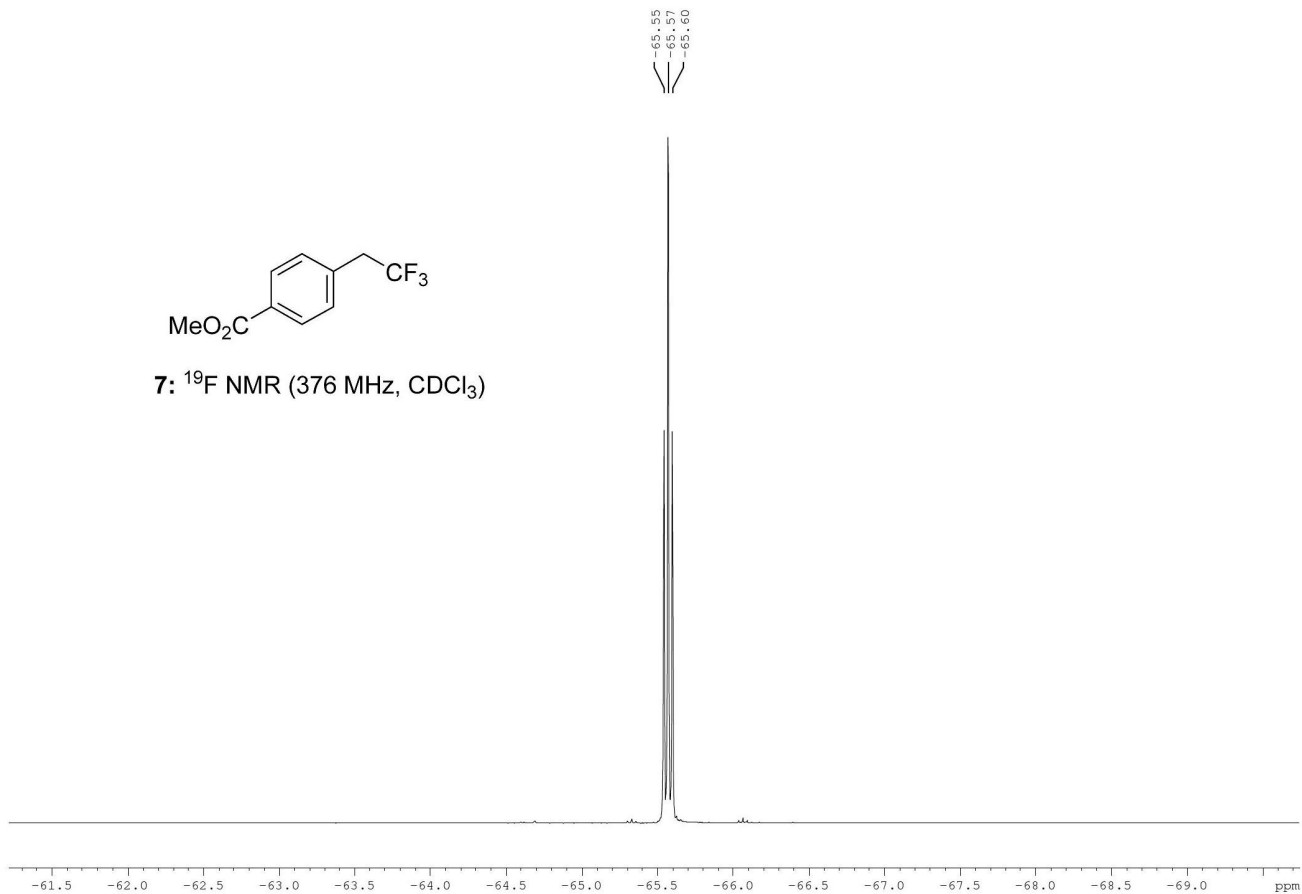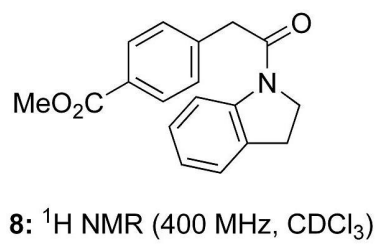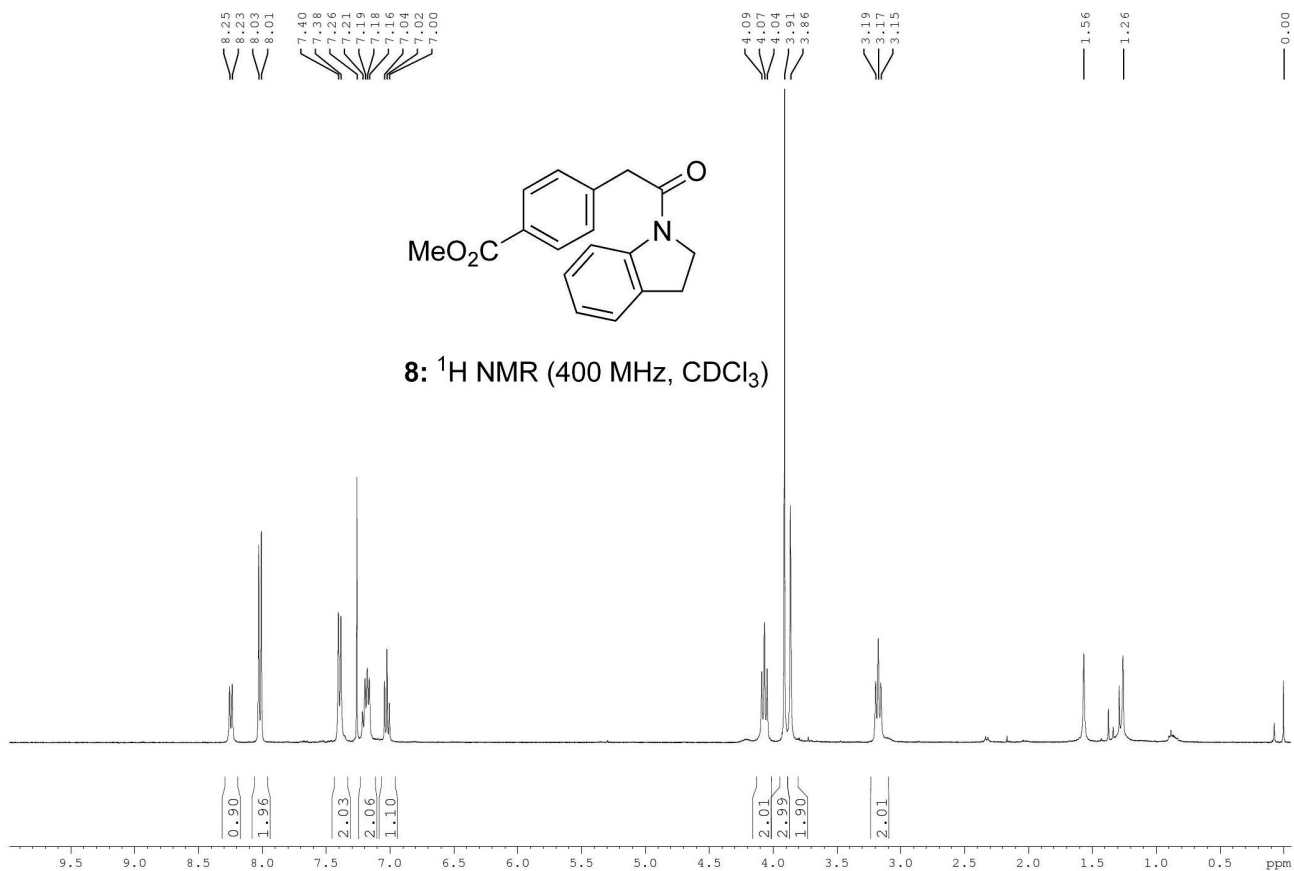

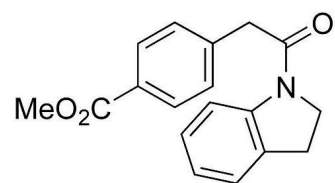

8:  $^{13}\text{C}$  NMR (100 MHz,  $\text{CDCl}_3$ )

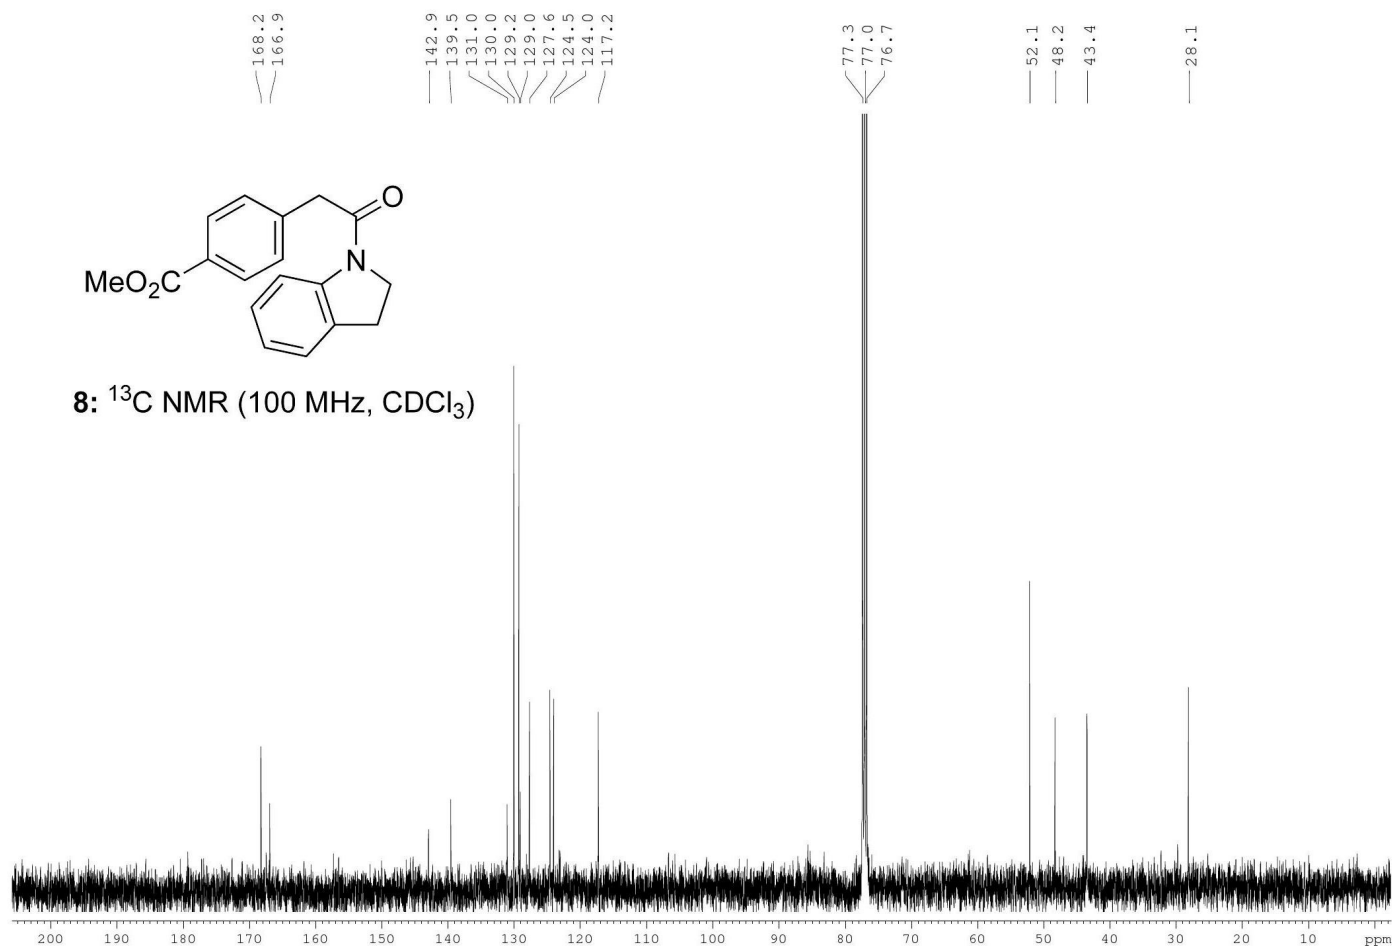

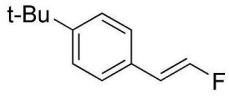

13: <sup>1</sup>H NMR (400 MHz, CDCl<sub>3</sub>)

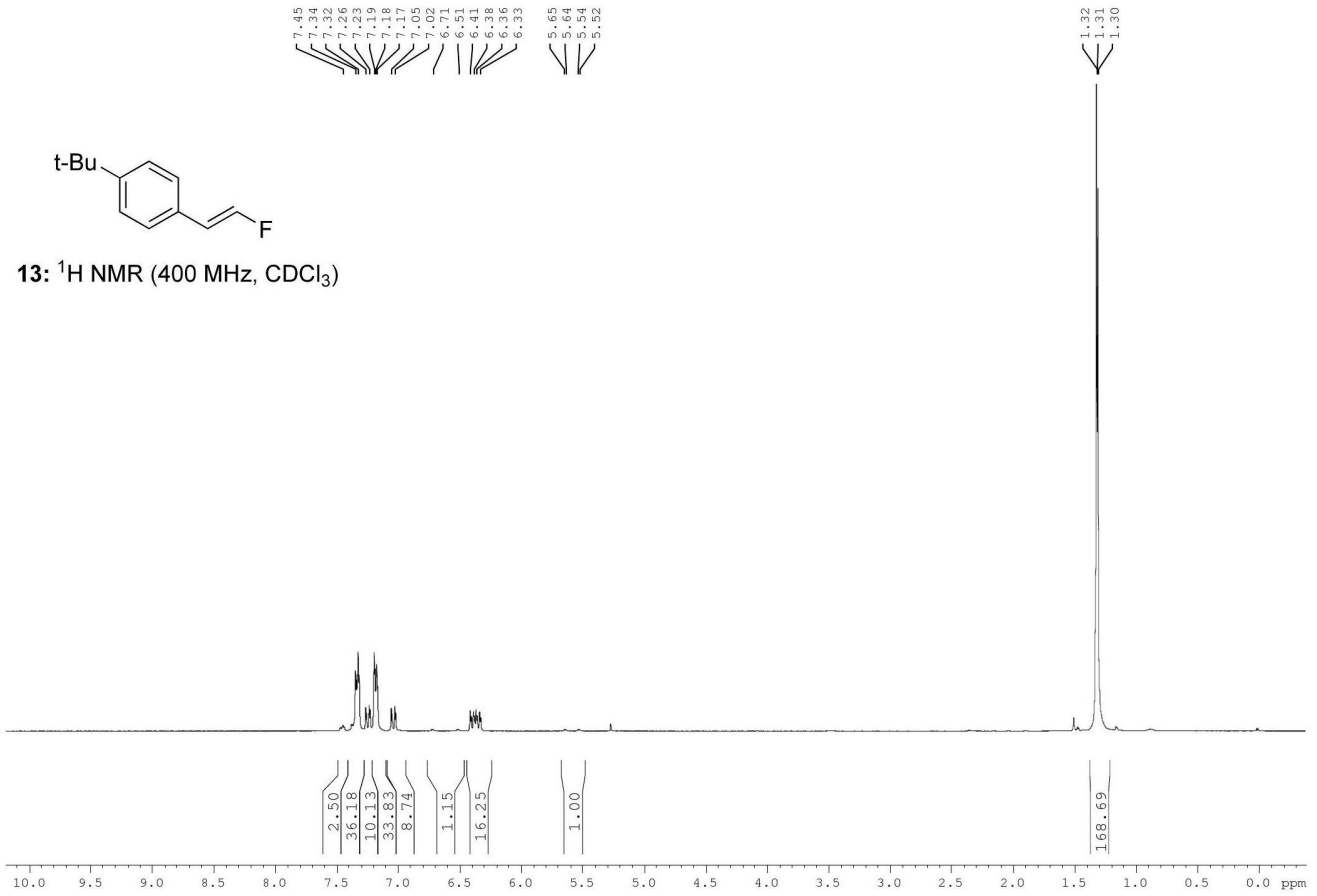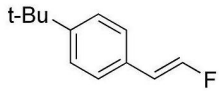

13: <sup>13</sup>C NMR (100 MHz, CDCl<sub>3</sub>)

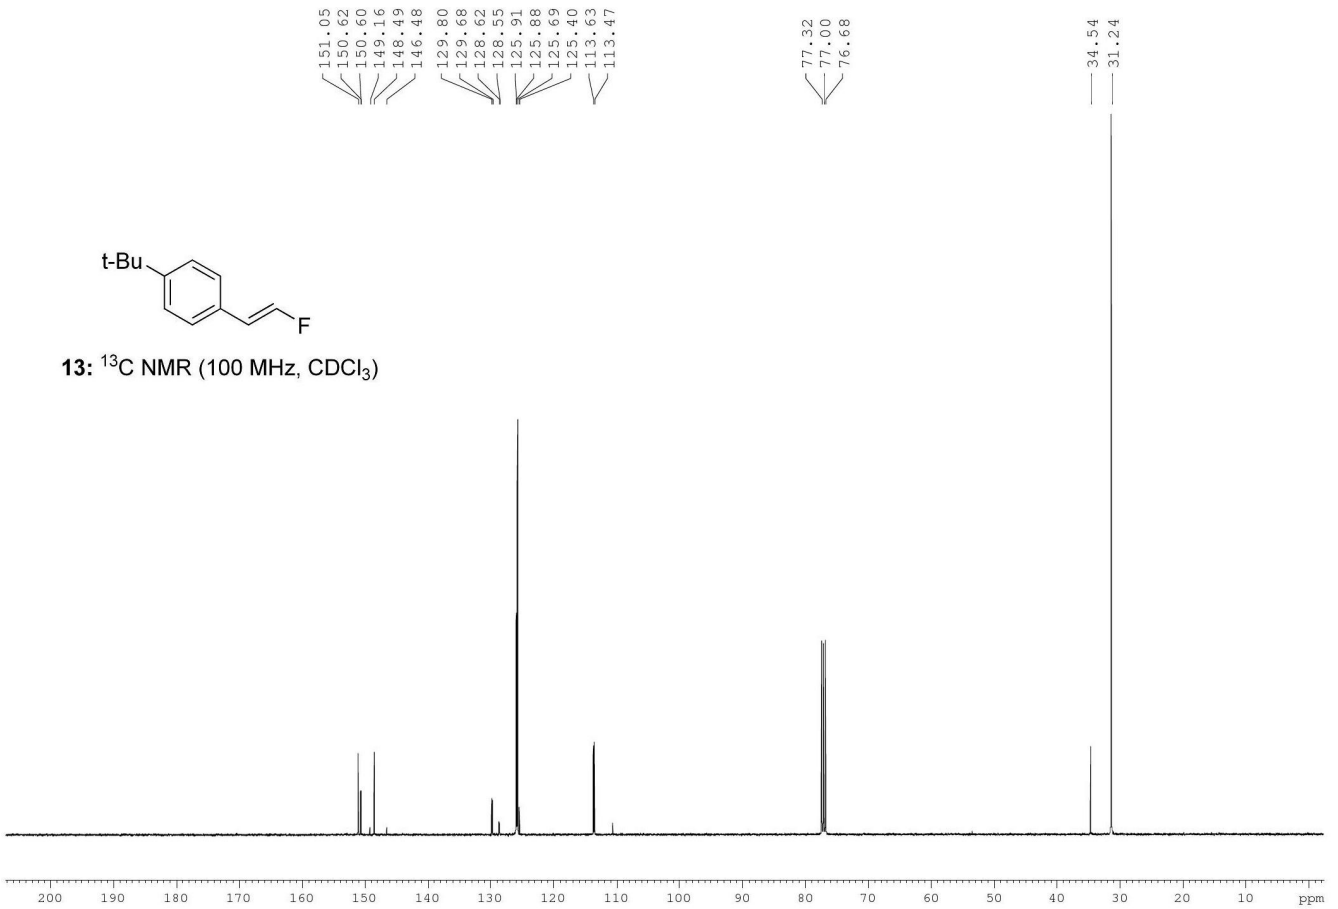

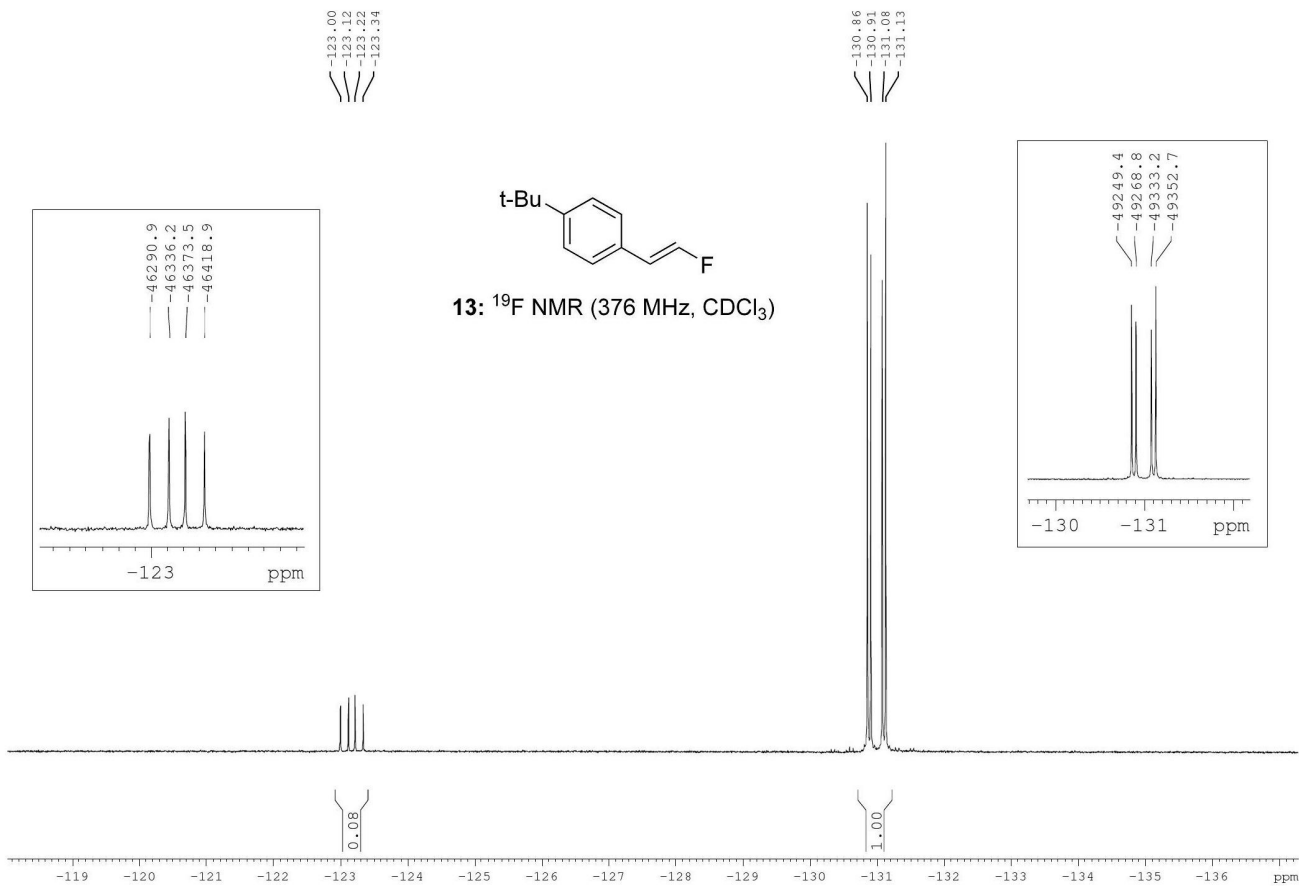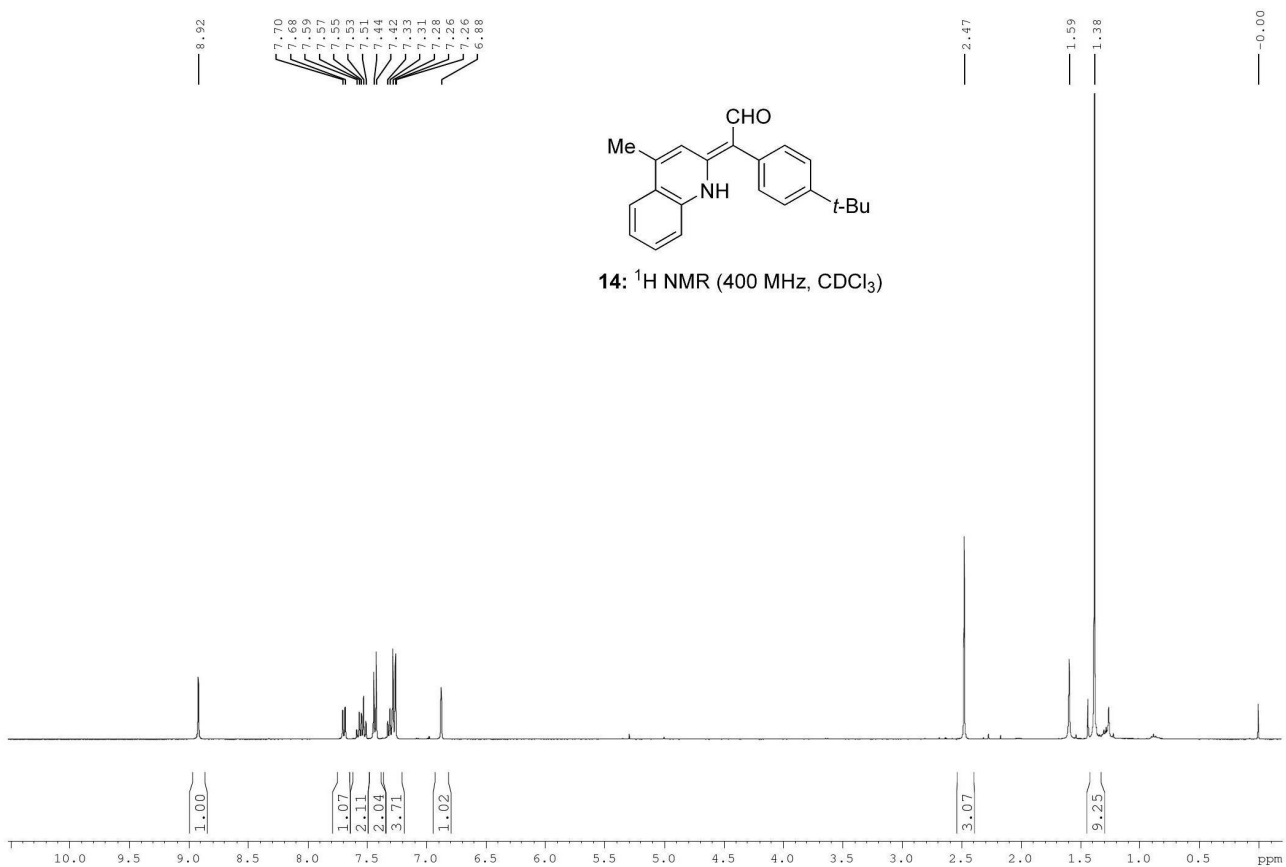



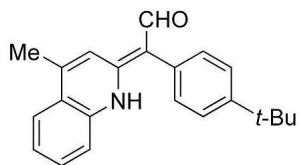

14:  $^{13}\text{C}$  NMR (100 MHz,  $\text{CDCl}_3$ )

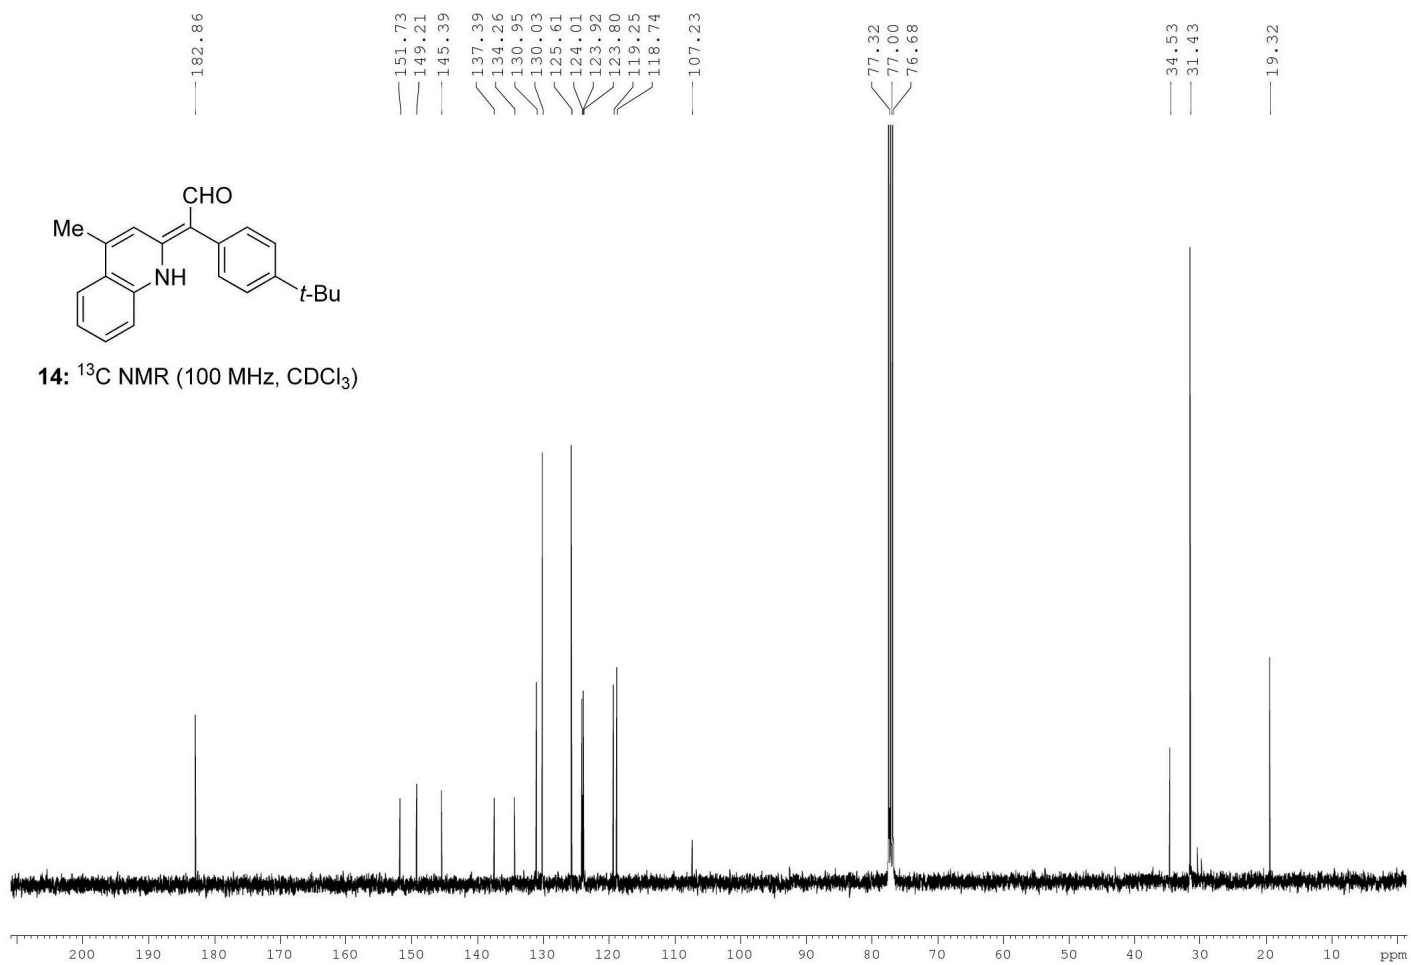

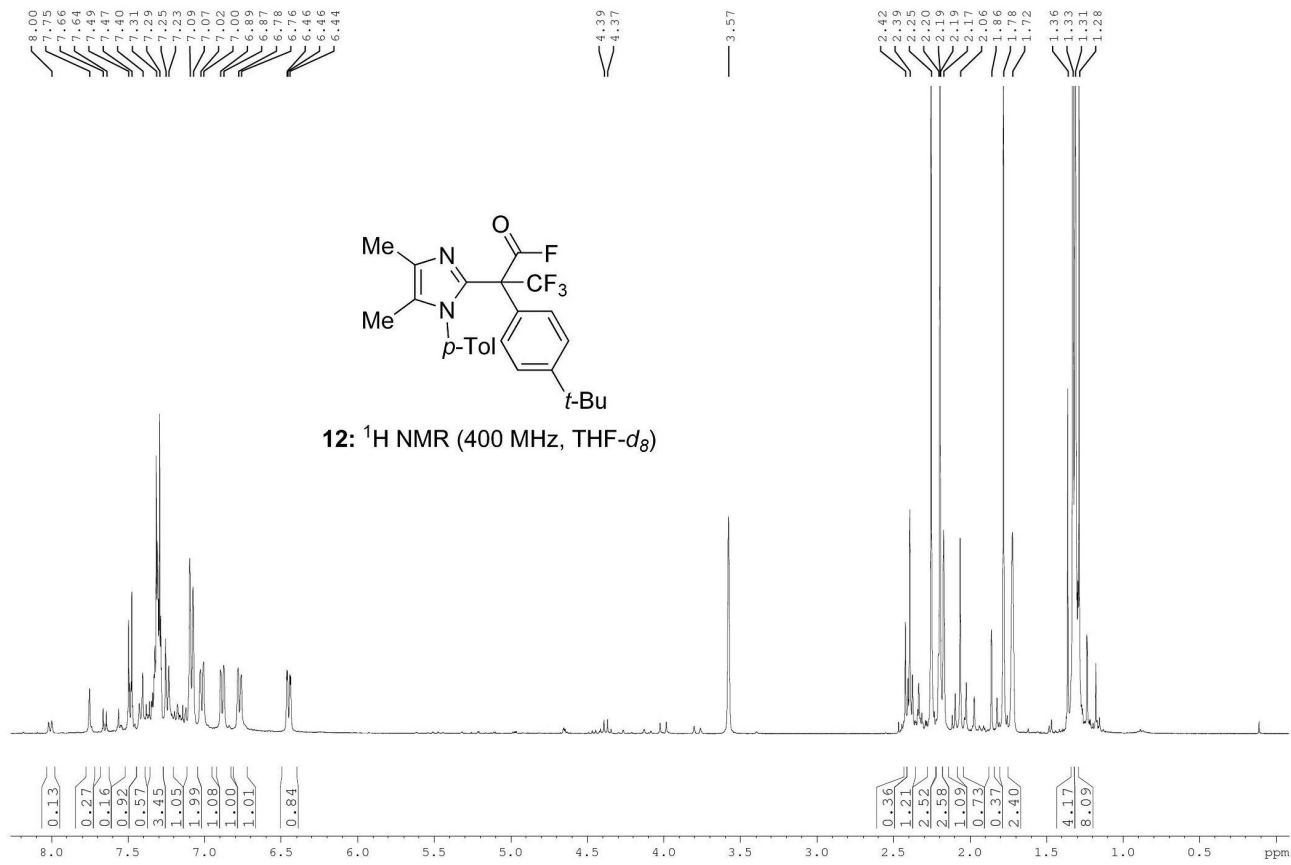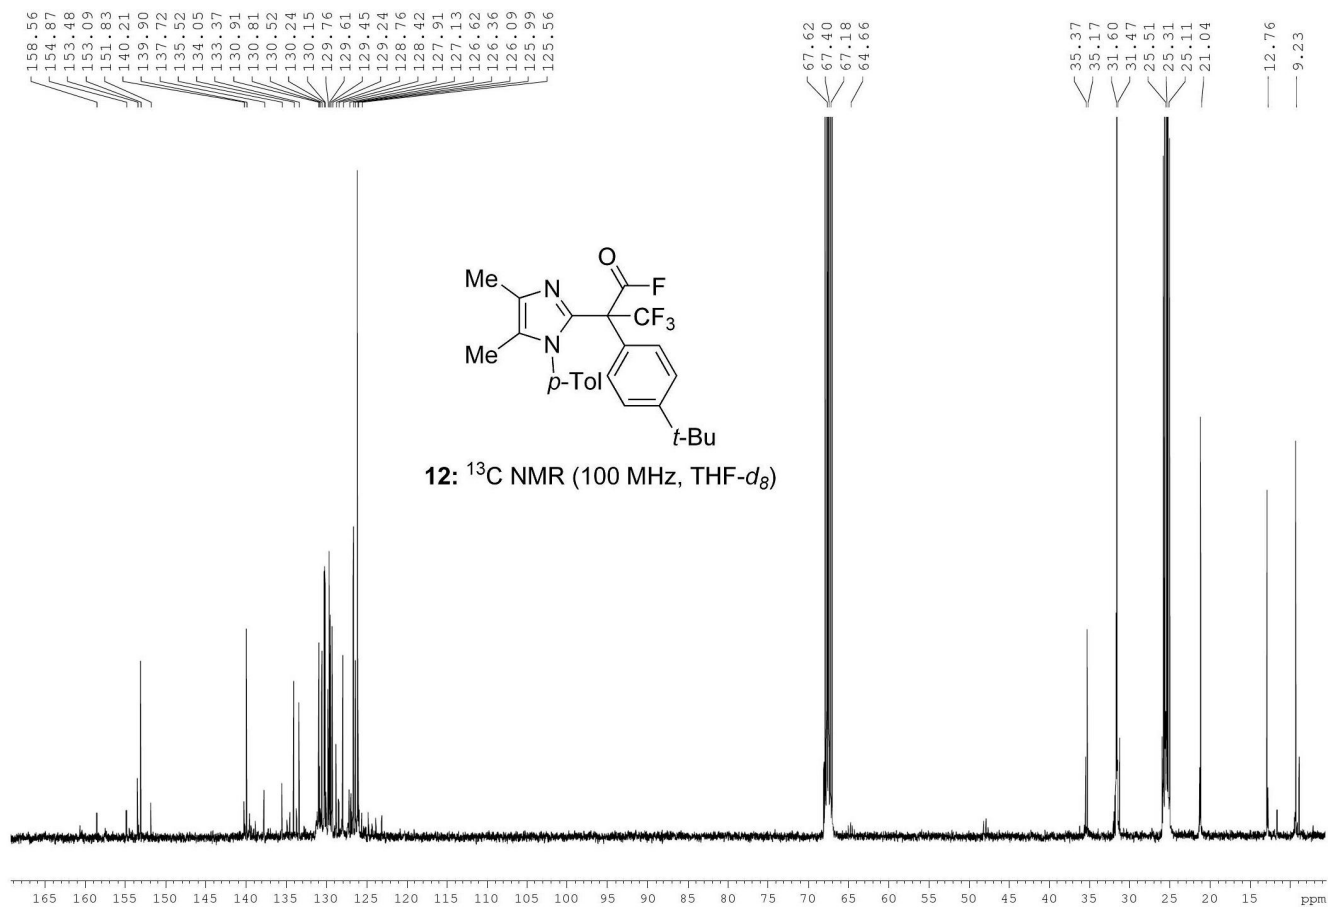

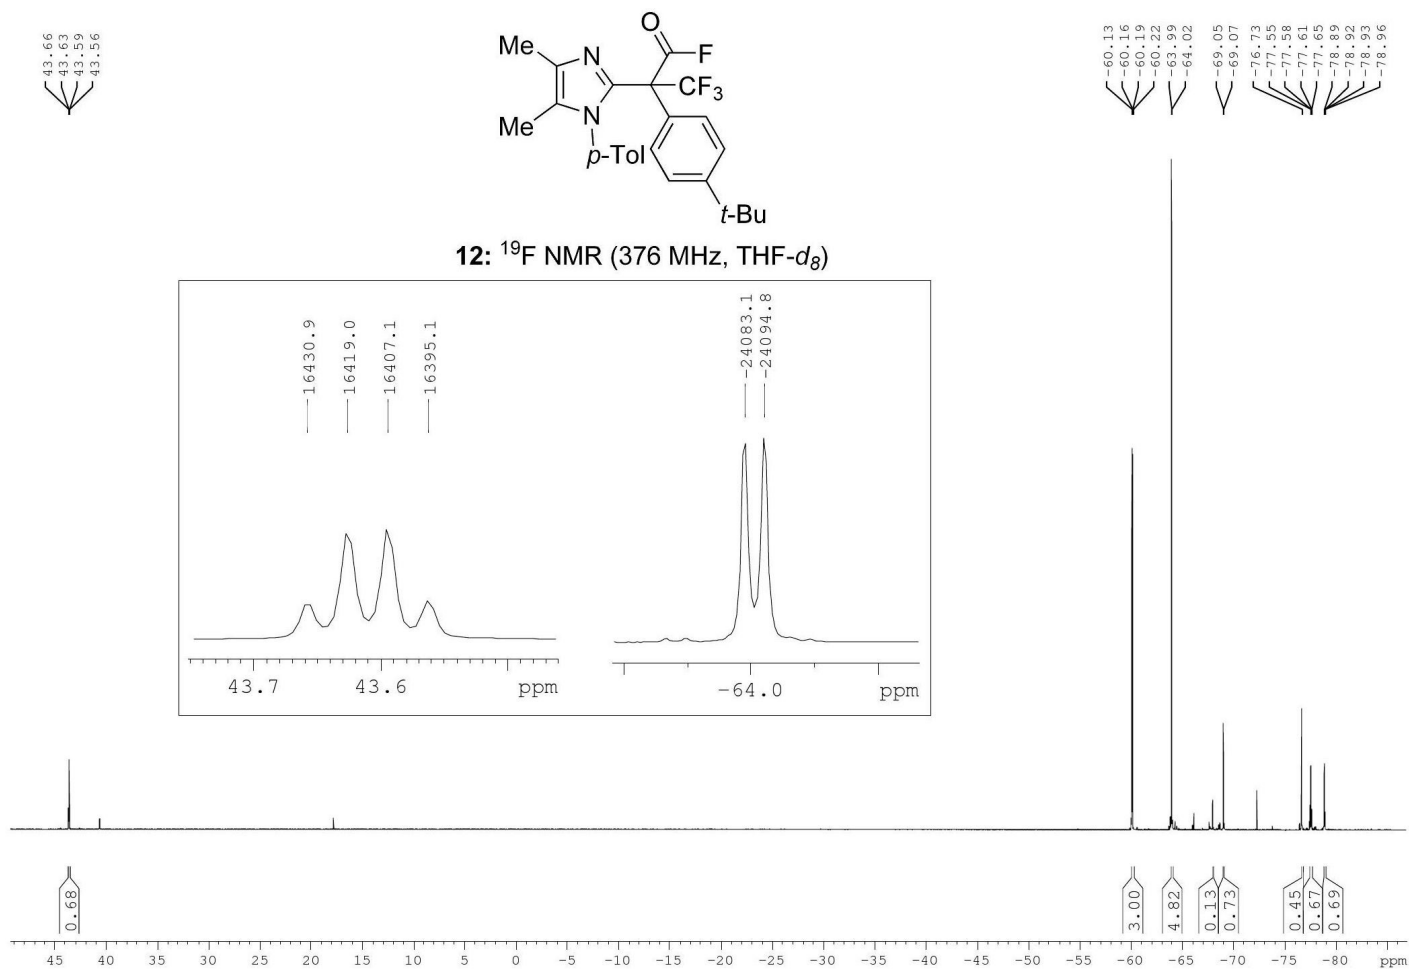

Supplement: c5ob01355k2.pdf [file c5ob01355k2.pdf]
